# Supplementary material
Source: publisher figshare collection journal article supplement (https://acs.figshare.com/ndownloader/files/24442394)

**Lewis Acid Mediated Intramolecular Trifluoromethylthiolation of  
Alkenes with Phenols: Access to SCF<sub>3</sub>-Containing Chromane and  
Dihydrobenzofuran Compounds**

Xu-Feng Song, Tong-Mei Ding, Deng Zhu, Jie Huang, Zhi-Min Chen\*

School of Chemistry and Chemical Engineering, Shanghai Key Laboratory for Molecular Engineering of Chiral Drugs and Frontiers Science Center for Transformative Molecules, Shanghai Jiao Tong University, Shanghai 200240, P. R. China

*Email: chenzhimin221@sjtu.edu.cn*

**Table of Contents**

|                                                                                    |         |
|------------------------------------------------------------------------------------|---------|
| General considerations                                                             | S2      |
| The preparation of substrates                                                      | S3-S9   |
| General procedures B for the synthesis of products <b>3</b>                        | S9-S18  |
| General procedures C for the synthesis of desired products <b>6</b>                | S18-S25 |
| 1 Mmol scale reactions and 5 mmol scale reactions                                  | S25-S26 |
| Crystal of <b>3a</b> and Spectroscopy Studies for Mechanism                        | S26-S30 |
| References                                                                         | S30-S31 |
| Copies of <sup>1</sup> H NMR, <sup>13</sup> C NMR, and <sup>19</sup> F NMR spectra | S32-S92 |

## 1 General considerations

Unless otherwise noted, all reactions were carried out under an atmosphere of argon, using over-dried or flame-dried glassware equipped with a magnetic stir bar. All chemicals were purchased from commercial suppliers and used without further purification. In addition to commercially available extra dry solvents, all solvents were purified by standard operating method. Methanol (MeOH) was purchased from commercial suppliers (*Energy Chemical*) and used without further purification. Acetone was purchased from commercial suppliers (*China National Medicines Corporation Ltd*) and used without further purification. Carbon tetrachloride (CCl<sub>4</sub>) was purchased from commercial suppliers (*Adamas-beta*) and used without further purification. Tetrahydrofuran (THF) and acetonitrile (MeCN) was purchased from commercial suppliers (*J&K Technology*) and used without further purification. Thin-layer chromatography was performed with EMD silica gel 60 F<sub>254</sub> plates eluting with solvents indicated, visualized by a 254 nm UV lamp and stained with phosphomolybdic acid (PMA). <sup>1</sup>H NMR, <sup>13</sup>C NMR and <sup>19</sup>F NMR spectra were obtained on Bruker AM-400 and Bruker AM-500. Chemical shifts (δ) were quoted in ppm relative to tetramethylsilane or deuterated solvent as internal standard (CDCl<sub>3</sub>: 7.26 ppm for <sup>1</sup>H NMR; CDCl<sub>3</sub>: 77.16 ppm for <sup>13</sup>C NMR), multiplicities are as indicated: s = singlet, d = doublet, t = triplet, q = quartet, m = multiplet. High-resolution mass spectral analysis (HRMS) data was measured on a Bruker impact II (Q-TOF) mass spectrum by means of the ESI technique. High-resolution gas-chromatography analysis (HRGC) data was measured on an Agilent Technologies 7250 GCQTOF mass spectrum by means of the EI technique. Crystallographic data were obtained from a Bruker D8 VENTURE diffractometer. Melting points were measured on a melting point apparatus and were uncorrected.

## 2. The preparation of substrates

2.1 The substrates **1a**<sup>1</sup>, **1b**<sup>2</sup>, **1c-1e**<sup>1</sup>, **1f**<sup>2</sup>, **1g**<sup>1</sup>, **1h**<sup>2</sup>, **1i-1m**<sup>1</sup>, **1n**<sup>2</sup>, **1o**<sup>3</sup>, **5h**<sup>4</sup>, **5l**<sup>4</sup>, **5m**<sup>5</sup>, **5n**<sup>6</sup> and **5o**<sup>6</sup> were known compounds.

Our analytical data (<sup>1</sup>H-NMR, <sup>13</sup>C-NMR and <sup>19</sup>F-NMR) match with the literatures.<sup>1-6</sup>

**Figure S1**

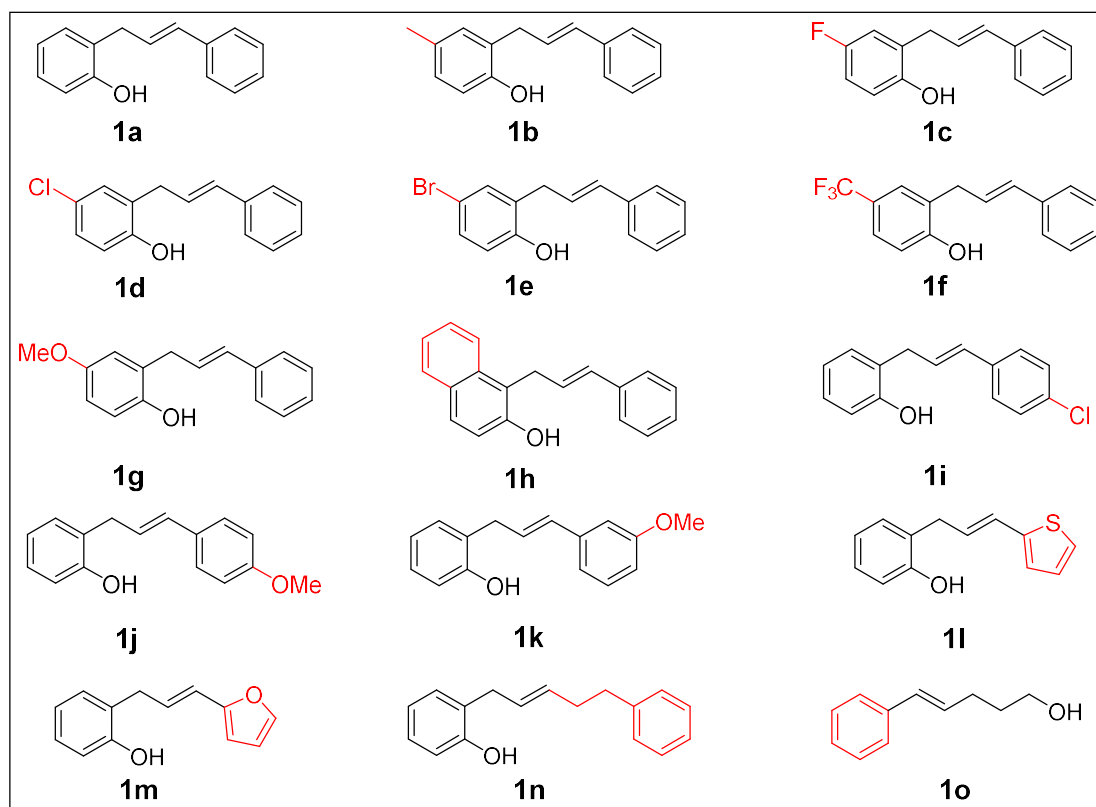

**Figure S2**

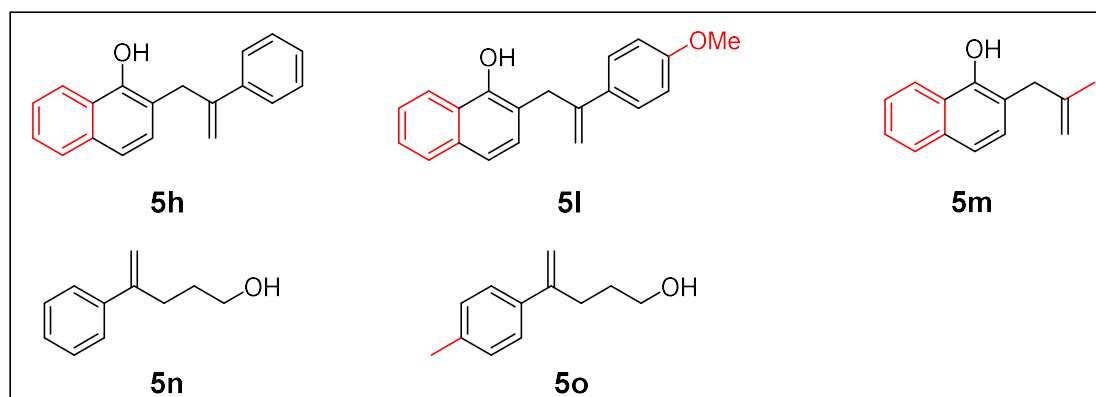

2.2 The general procedure **A** for the preparation of substrates **5a-5g** and **5i-5k**.



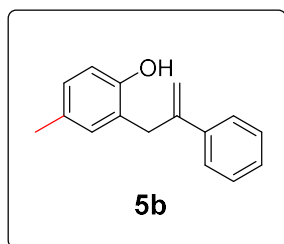

According to the general procedure **A**, at the step 3, **S1-3b** (3.77 mmol, 846.3 mg) and *N,N*-dimethylaniline (3 mL) were added. The solution was stirred at 200 °C (using heating mantle) for 5 h. Flash column chromatography (SiO<sub>2</sub>, PE:EA = 20:1, v/v) to afford **5b** as a colorless oil (253.3 mg, 30%), *R<sub>f</sub>* = 0.3 (silica gel, PE:EA = 10:1); **<sup>1</sup>H NMR** (400 MHz, CDCl<sub>3</sub>) δ 7.54 – 7.46 (m, 2H), 7.38 – 7.26 (m, 3H), 7.02 – 6.87 (m, 2H), 6.72 (d, *J* = 8.0 Hz, 1H), 5.51 (d, *J* = 1.1 Hz, 1H), 5.01 (m, 1H), 4.74 (d, *J* = 1.6 Hz, 1H), 3.80 (s, 2H), 2.24 (s, 3H); **<sup>13</sup>C NMR** (101 MHz, CDCl<sub>3</sub>) δ 151.9, 146.3, 140.7, 131.7, 130.3, 128.5, 127.9, 126.2, 125.0, 115.8, 114.1, 36.3, 20.7; **HRMS** (ESI) *m/z*: [M+Na]<sup>+</sup> calcd for C<sub>16</sub>H<sub>16</sub>NaO 247.1093; Found 247.1091.

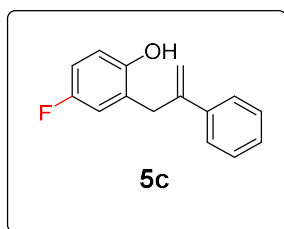

According to the general procedure **A**, at the step 3, **S1-3c** (6.99 mmol, 1.60 g) and *N,N*-dimethylaniline (5 mL) were added. The solution was stirred at 200 °C (using heating mantle) for 5.5 h. Flash column chromatography (SiO<sub>2</sub>, PE:EA = 20:1, v/v) to afford **5c** as a colorless oil (852.8 mg, 56%), *R<sub>f</sub>* = 0.3 (silica gel, PE:EA = 10:1); **<sup>1</sup>H NMR** (400 MHz, CDCl<sub>3</sub>) δ 7.62 – 7.40 (m, 2H), 7.37 – 7.25 (m, 3H), 6.87 (dd, *J* = 9.0, 3.0 Hz, 1H), 6.80 (td, *J* = 8.2, 3.0 Hz, 1H), 6.74 (dd, *J* = 8.8, 4.8 Hz, 1H), 5.55 (q, *J* = 1.0 Hz, 1H), 5.06 (q, *J* = 1.4 Hz, 1H), 4.97 (s, 1H), 3.82 (s, 2H); **<sup>13</sup>C NMR** (101 MHz, CDCl<sub>3</sub>) δ 157.3 (d, *J* = 238.9 Hz), 150.0 (d, *J* = 2.2 Hz), 145.6, 140.2, 128.6, 128.0, 127.1 (d, *J* = 7.3 Hz), 126.1, 117.2 (d, *J* = 23.3 Hz), 116.7 (d, *J* = 8.3 Hz), 114.6, 114.1 (d, *J* = 23.2 Hz), 36.1 (d, *J* = 1.2 Hz); **<sup>19</sup>F NMR** (376 MHz, CDCl<sub>3</sub>) δ -123.78; **HRMS** (ESI) *m/z*: [M+Na]<sup>+</sup> calcd for C<sub>15</sub>H<sub>13</sub>FNao 251.0843; Found 251.0845.

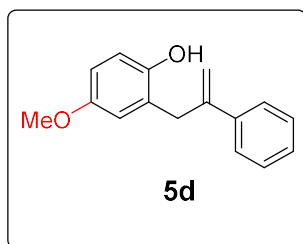

According to the general procedure **A**, at the step 3, **S1-3d** (5.91 mmol, 1.42 g) and *N,N*-dimethylaniline (5 mL) were added. The solution was stirred at 200 °C (using heating mantle) for 5 h. Flash column chromatography (SiO<sub>2</sub>, PE:EA = 20:1, v/v) to afford **5d** as a colorless oil. (696.8 mg, 49%), *R<sub>f</sub>*=0.3 (silica gel, PE:EA = 10:1); **<sup>1</sup>H NMR** (400 MHz, CDCl<sub>3</sub>) δ 7.53 – 7.42 (m, 2H), 7.36 – 7.18 (m, 3H), 6.70 (dd, *J* = 5.9, 2.8 Hz, 2H), 6.63 (dd, *J* = 8.7, 3.0 Hz, 1H), 5.49 (d, *J* = 1.2 Hz, 1H), 5.08 (s, 1H), 5.00 (q, *J* = 1.4 Hz, 1H), 3.78 (s, 2H), 3.68 (s, 3H); **<sup>13</sup>C NMR** (101 MHz, CDCl<sub>3</sub>) δ 153.7, 148.0, 146.0, 140.6, 128.4, 127.8, 126.6, 126.1, 116.6, 116.5, 114.2, 112.8, 55.8, 36.2; **HRMS** (ESI) *m/z*: [M+Na]<sup>+</sup> calcd for C<sub>16</sub>H<sub>16</sub>NaO<sub>2</sub> 263.1043; Found 263.1044.

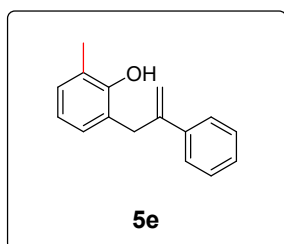

According to the general procedure **A**, at the step 3, **S1-3e** (2.23 mmol, 499.4 mg) and *N,N*-dimethylaniline (3 mL) were added. The solution was stirred at 200 °C (using heating mantle) for 5 h. Flash column chromatography (SiO<sub>2</sub>, PE:EA = 20:1, v/v) to afford **5e** as a colorless oil. (125.3 mg, 25%), *R<sub>f</sub>*=0.3 (silica gel, PE:EA = 10:1); **<sup>1</sup>H NMR** (400 MHz, CDCl<sub>3</sub>) δ 7.57 – 7.44 (m, 2H), 7.38 – 7.25 (m, 3H), 7.02 (t, *J* = 8.2 Hz, 2H), 6.79 (t, *J* = 7.5 Hz, 1H), 5.53 (d, *J* = 1.2 Hz, 1H), 5.05 (t, *J* = 1.5 Hz, 1H), 4.95 (s, 1H), 3.85 (s, 2H), 2.26 (s, 3H); **<sup>13</sup>C NMR** (101 MHz, CDCl<sub>3</sub>) δ 152.6, 146.2, 140.6, 129.5, 128.9, 128.5, 127.9, 126.2, 124.6, 124.2, 120.6, 114.3, 36.7, 16.1; **HRMS** (ESI) *m/z*: [M+Na]<sup>+</sup> calcd for C<sub>16</sub>H<sub>16</sub>NaO: 247.1093; Found 247.1094.

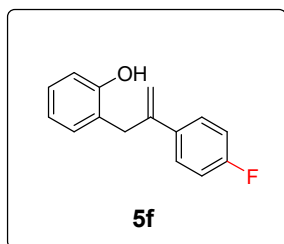

According to the general procedure **A**, at the step 3, **S1-3f** (14.08 mmol, 3.21 g) and *N,N*-dimethylaniline (5 mL) were added. The solution was stirred at 200 °C (using heating mantle) for 5 h. Flash column chromatography (SiO<sub>2</sub>, PE:EA = 20:1, v/v) to afford **5f** as a white solid. (1.04 g, 32%), *R<sub>f</sub>*=0.3 (silica gel, PE:EA = 10:1); **<sup>1</sup>H NMR** (400 MHz, CDCl<sub>3</sub>) δ 7.52 – 7.39 (m, 2H), 7.13 (m, 2H), 7.07 – 6.96 (m, 2H), 6.89 (td, *J* = 7.4, 1.2 Hz, 1H), 6.81 (dd, *J* = 8.4, 1.3 Hz, 1H), 5.47 (d, *J* = 1.1 Hz, 1H), 5.13 – 4.97 (m, 2H), 3.83 (s, 2H); **<sup>13</sup>C NMR** (101 MHz, CDCl<sub>3</sub>) δ 162.5 (d, *J* = 247.6 Hz), 154.0, 145.3, 136.6 (d, *J* = 3.3 Hz), 131.0 (d, *J* = 3.8 Hz), 128.1 (d, *J* = 1.8 Hz), 127.8 (d, *J* = 8.1 Hz), 125.1, 121.1, 115.9 (d, *J* = 7.0 Hz), 115.3 (d, *J* = 21.2 Hz), 114.2, 36.2; **<sup>19</sup>F NMR** (376 MHz, CDCl<sub>3</sub>) δ -114.63; **HRMS** (ESI) *m/z*: [M+Na]<sup>+</sup> calcd for C<sub>15</sub>H<sub>13</sub>FNao 251.0843; Found 251.0847.

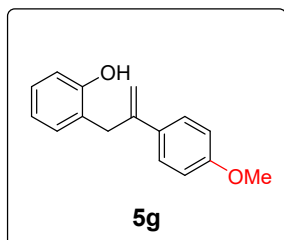

According to the general procedure **A**, at the step 3, **S1-3g** (11.87 mmol, 2.85 g) and *N,N*-dimethylaniline (5 mL) were added. The solution was stirred at 200 °C (using heating mantle) for 5 h. Flash column chromatography (SiO<sub>2</sub>, PE:EA = 20:1, v/v) to afford **5g** as a white solid. (825 mg, 29%), *R<sub>f</sub>*=0.3 (silica gel, PE:EA = 10:1); **<sup>1</sup>H NMR** (400 MHz, CDCl<sub>3</sub>) δ 7.53 – 7.35 (m, 2H), 7.22 – 7.02 (m, 2H), 6.92 – 6.83 (m, 3H), 6.81 (dd, *J* = 8.0, 1.2 Hz, 1H), 5.46 (s, 1H), 5.13 (s, 1H), 4.98 (d, *J* = 1.4 Hz, 1H), 3.83 (s, 2H), 3.80 (s, 3H); **<sup>13</sup>C NMR** (101 MHz, CDCl<sub>3</sub>) δ 159.4, 154.3, 145.4, 132.9, 131.1, 128.0, 127.3, 125.3, 121.0, 116.0, 113.8, 112.6, 55.4, 36.4; **HRMS** (ESI) *m/z*: [M+Na]<sup>+</sup> calcd for C<sub>16</sub>H<sub>16</sub>NaO<sub>2</sub> 263.1043; Found 263.1042.

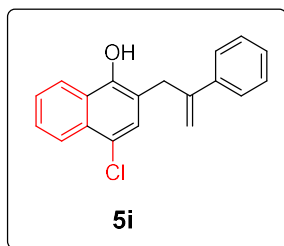

According to the general procedure **A**, at the step 3, **S1-3i** (1.54 mmol, 455.1 mg) and decahydronaphthalene (3 mL) were added. The solution was stirred at 185 °C (using heating mantle) for 2.5 h. Flash column chromatography (SiO<sub>2</sub>, PE:EA = 20:1, v/v) to afford **5i** as a colorless oil. (91.3 mg, 20%), *R<sub>f</sub>*=0.2 (silica gel, PE:EA = 10:1); <sup>1</sup>H NMR (400 MHz, CDCl<sub>3</sub>) δ 8.21 (m, 2H), 7.62 – 7.49 (m, 4H), 7.41 – 7.29 (m, 4H), 5.65 – 5.55 (m, 2H), 5.16 (d, *J* = 1.3 Hz, 1H), 3.97 (s, 2H); <sup>13</sup>C NMR (101 MHz, CDCl<sub>3</sub>) δ 149.0, 145.6, 139.9, 130.7, 128.7, 128.6, 128.3, 127.0, 126.2, 126.1, 124.4, 123.4, 122.1, 118.5, 114.9, 37.1; HRMS (ESI) *m/z*: [M+Na]<sup>+</sup> calcd for C<sub>19</sub>H<sub>15</sub>ClNaO 317.0704; Found 317.0703.

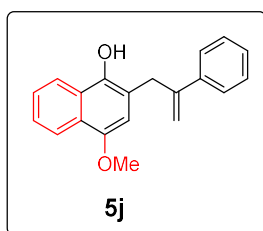

According to the general procedure **A**, at the step 3, **S1-3j** (2.79 mmol, 809 mg) and decahydronaphthalene (3 mL) were added. The solution was stirred at 185 °C (using heating mantle) for 2.5 h. Flash column chromatography (SiO<sub>2</sub>, PE:EA = 20:1, v/v) to afford **5j** as a white solid. (463 mg, 57%) *R<sub>f</sub>*=0.2 (silica gel, PE:EA = 10:1); <sup>1</sup>H NMR (400 MHz, CDCl<sub>3</sub>) δ 8.20 (d, *J* = 8.2 Hz, 1H), 8.12 (d, *J* = 8.2 Hz, 1H), 7.68 – 7.41 (m, 4H), 7.33 (m, 3H), 6.61 (s, 1H), 5.55 (s, 1H), 5.11 (s, 1H), 5.06 (s, 1H), 3.98 (s, 2H), 3.93 (s, 3H); <sup>13</sup>C NMR (101 MHz, CDCl<sub>3</sub>) δ 149.8, 146.1, 143.1, 140.5, 128.6, 128.1, 126.2, 126.1, 126.1, 125.6, 125.3, 122.0, 121.3, 118.1, 114.3, 106.9, 55.9, 37.4; HRMS (ESI) *m/z*: [M+Na]<sup>+</sup> calcd for C<sub>20</sub>H<sub>18</sub>NaO<sub>2</sub> 313.1199; Found 313.1199.



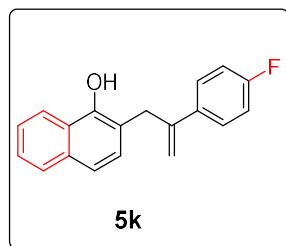

According to the general procedure **A**, at the step 3, **S1-3k** (3.12 mmol, 869 mg) and decahydronaphthalene (3 mL) were added. The solution was stirred at 185 °C (using heating mantle) for 2.5 h. Flash column chromatography (SiO<sub>2</sub>, PE:EA = 20:1, v/v) to afford **5k** as a white solid. (521 mg, 60%), *R<sub>f</sub>*=0.2 (silica gel, PE:EA = 10:1); <sup>1</sup>H NMR (400 MHz, CDCl<sub>3</sub>) δ 8.17 (m, 1H), 7.85 – 7.76 (m, 1H), 7.58 – 7.45 (m, 4H), 7.43 (d, *J* = 8.3 Hz, 1H), 7.28 (d, *J* = 0.9 Hz, 1H), 7.02 (m, 2H), 5.57 (s, 1H), 5.53 (d, *J* = 1.1 Hz, 1H), 5.16 (d, *J* = 1.3 Hz, 1H), 4.00 (s, 2H); <sup>13</sup>C NMR (101 MHz, CDCl<sub>3</sub>) δ 162.7 (d, *J* = 248.3 Hz), 149.7, 145.2, 136.3 (d, *J* = 3.4 Hz), 133.9, 128.9, 127.9 (d, *J* = 8.1 Hz), 127.7, 126.0, 125.5, 124.9, 121.4, 120.7, 117.9, 115.4 (d, *J* = 21.2 Hz), 114.5, 37.4; <sup>19</sup>F NMR (376 MHz, CDCl<sub>3</sub>) δ -114.19; HRMS (ESI) *m/z*: [M+Na]<sup>+</sup> calcd for C<sub>19</sub>H<sub>15</sub>FNao 301.0999; Found 301.1001.

### 3. General procedures B for the synthesis of desired products 3

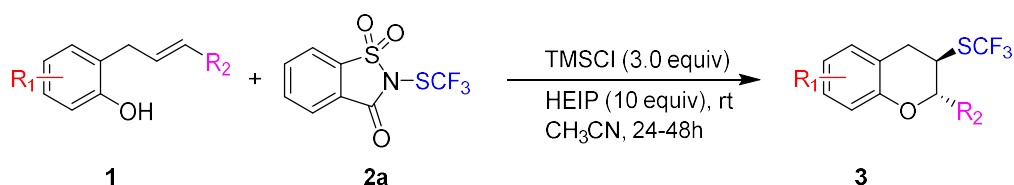

At room temperature, **1** (0.1 mmol) and **2a** (0.13 mmol) were added into an over-dried 10 mL flask equipped with a stir bar. Seal the flask with a septum. Anhydrous CH<sub>3</sub>CN (1 mL) was added via a syringe, and then TMSCl (38.0 μL, 0.3 mmol) and HFIP (105.0 μL, 1.0 mmol) were added by using syringes respectively and stirred for 24-48 hours. After the reaction was completed (monitored by TLC), the solvent was removed under reduce pressure, the crude product was purified by silica gel flash column chromatography to obtain products **3**.

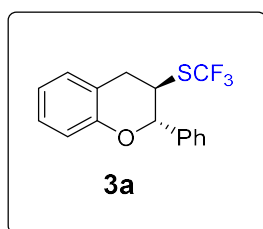

According to the general procedure **B**, the reaction time is 24 h, flash column chromatography (SiO<sub>2</sub>, PE) to afford **3a** as a white solid (23.1 mg, 74%), *R<sub>f</sub>*=0.4 (silica gel, PE); **Mp** : 84.5 ~ 86.5 °C; **<sup>1</sup>H NMR** (400 MHz, CDCl<sub>3</sub>) δ 7.46 – 7.30 (m, 5H), 7.25 – 7.17 (m, 1H), 7.07 (d, *J* = 8.1 Hz, 1H), 7.03 – 6.91 (m, 2H), 5.29 (d, *J* = 6.0 Hz, 1H), 3.97 (q, *J* = 6.0 Hz, 1H), 3.22 (dd, *J* = 16.7, 5.0 Hz, 1H), 3.07 (dd, *J* = 16.7, 6.8 Hz, 1H); **<sup>13</sup>C NMR** (101 MHz, CDCl<sub>3</sub>) δ 153.6, 138.8, 131.0 (q, *J* = 308.0 Hz), 129.7, 128.9, 128.8, 128.6, 126.3, 121.4, 119.0, 116.9, 76.8, 43.5 (d, *J* = 1.7 Hz), 31.0; **<sup>19</sup>F NMR** (376 MHz, CDCl<sub>3</sub>) δ -39.01; **HRMS** (ESI) *m/z*: [M+Na]<sup>+</sup> calcd for C<sub>16</sub>H<sub>13</sub>F<sub>3</sub>NaOS 333.0531; Found 333.0530.

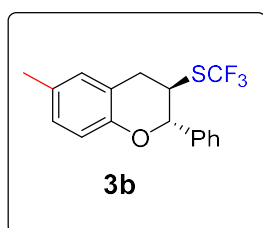

According to the general procedure **B**, the reaction time is 24 h, flash column chromatography (SiO<sub>2</sub>, PE) to afford **3b** as a colorless oil (21.9 mg, 68%), *R<sub>f</sub>*=0.5 (silica gel, PE); **<sup>1</sup>H NMR** (400 MHz, CDCl<sub>3</sub>) δ 7.47 – 7.28 (m, 5H), 7.09 (dd, *J* = 7.1, 1.8 Hz, 1H), 6.95 – 6.74 (m, 2H), 5.36 (d, *J* = 5.7 Hz, 1H), 3.95 (q, *J* = 5.7 Hz, 1H), 3.18 (dd, *J* = 16.7, 4.9 Hz, 1H), 3.04 (dd, *J* = 16.7, 6.4 Hz, 1H), 2.28 (s, 3H); **<sup>13</sup>C NMR** (101 MHz, CDCl<sub>3</sub>) δ 151.6, 139.2, 131.1 (q, *J* = 308.2 Hz), 129.7, 128.8, 128.6, 127.3, 126.1, 120.8, 118.3, 79.8, 43.6 (d, *J* = 1.6 Hz), 30.9, 16.2; **<sup>19</sup>F NMR** (376 MHz, CDCl<sub>3</sub>) δ -39.14; **HRMS** (ESI) *m/z*: [M+Na]<sup>+</sup> calcd for C<sub>17</sub>H<sub>15</sub>F<sub>3</sub>NaOS 347.0688; Found 347.0692.

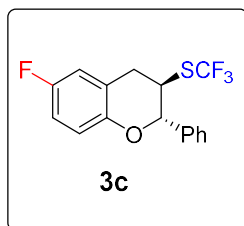

According to the general procedure **B**, the reaction time is 24 h, flash column chromatography (SiO<sub>2</sub>, PE) to afford **3c** as a white solid (22.6 mg, 69%), *R<sub>f</sub>*=0.5 (silica gel, PE); <sup>1</sup>H NMR (400 MHz, CDCl<sub>3</sub>) δ 7.45 – 7.34 (m, 3H), 7.32 (dd, *J* = 7.6, 1.9 Hz, 2H), 6.92 (dd, *J* = 7.1, 2.3 Hz, 2H), 6.77 (dd, *J* = 8.1, 2.3 Hz, 1H), 5.26 (d, *J* = 5.9 Hz, 1H), 3.95 (q, *J* = 5.9 Hz, 1H), 3.18 (dd, *J* = 17.0, 5.1 Hz, 1H), 3.04 (dd, *J* = 16.9, 6.6 Hz, 1H); <sup>13</sup>C NMR (101 MHz, CDCl<sub>3</sub>) δ 157.3 (d, *J* = 240.5 Hz), 149.5 (d, *J* = 2.1 Hz), 138.5, 133.4 (q, *J* = 308.2 Hz), 129.0, 128.9, 126.2, 120.1 (d, *J* = 8.2 Hz), 117.9 (d, *J* = 8.2 Hz), 115.6 (d, *J* = 23.2 Hz), 115.5 (d, *J* = 23.4 Hz), 79.7, 43.1 (d, *J* = 1.9 Hz), 31.1; <sup>19</sup>F NMR (376 MHz, CDCl<sub>3</sub>) δ -39.04, -122.78; HRMS (ESI) *m/z*: [M+Na]<sup>+</sup> calcd for C<sub>16</sub>H<sub>12</sub>F<sub>4</sub>NaOS 351.0437; Found 351.0438.

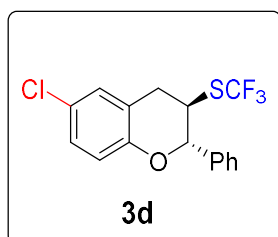

According to the general procedure **B**, the reaction time is 24 h, flash column chromatography (SiO<sub>2</sub>, PE) to afford **3d** as a white solid (25.3 mg, 73%), *R<sub>f</sub>*=0.5 (silica gel, PE); <sup>1</sup>H NMR (400 MHz, CDCl<sub>3</sub>) δ 7.45 – 7.33 (m, 3H), 7.30 (dd, *J* = 7.5, 1.9 Hz, 2H), 7.17 (dd, *J* = 8.7, 2.5 Hz, 1H), 7.05 (d, *J* = 2.5 Hz, 1H), 6.92 (d, *J* = 8.7 Hz, 1H), 5.30 (d, *J* = 5.6 Hz, 1H), 3.94 (q, *J* = 5.7 Hz, 1H), 3.15 (dd, *J* = 16.9, 5.0 Hz, 1H), 3.01 (dd, *J* = 16.9, 6.4 Hz, 1H); <sup>13</sup>C NMR (101 MHz, CDCl<sub>3</sub>) δ 152.1, 138.4, 130.9 (q, *J* = 308.2 Hz), 129.3, 129.0, 128.9, 128.7, 126.2, 126.1, 120.5, 118.2, 79.8, 42.9 (d, *J* = 1.6 Hz), 30.6; <sup>19</sup>F NMR (376 MHz, CDCl<sub>3</sub>) δ -39.06; HRMS (ESI) *m/z*: [M+Na]<sup>+</sup> calcd for C<sub>16</sub>H<sub>12</sub>ClF<sub>3</sub>NaOS 367.0142, Found 367.0140.

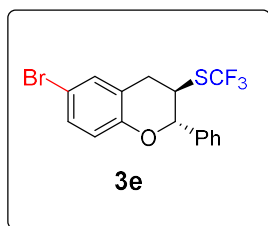

According to the general procedure **B**, the reaction time is 24 h, flash column chromatography (SiO<sub>2</sub>, PE) to afford **3e** as a white solid (23.9 mg, 61%), *R<sub>f</sub>*=0.5 (silica gel, PE); <sup>1</sup>H NMR (400 MHz, CDCl<sub>3</sub>) δ 7.46 – 7.33 (m, 3H), 7.30 (td, *J* = 6.0, 2.7 Hz, 3H), 7.19 (d, *J* = 2.3 Hz, 1H), 6.87 (d, *J* = 8.7 Hz, 1H), 5.30 (d, *J* = 5.6 Hz, 1H), 3.93 (q, *J* = 5.6 Hz, 1H), 3.15 (dd, *J* = 16.9, 5.0 Hz, 1H), 3.00 (dd, *J* = 16.9, 6.3 Hz, 1H); <sup>13</sup>C NMR (101 MHz, CDCl<sub>3</sub>) δ 152.7, 138.4, 132.2, 131.6, 130.9 (q, *J* = 308.2 Hz), 129.0, 128.9, 126.1, 121.1, 118.7, 113.5, 79.8, 42.9 (d, *J* = 1.7 Hz), 30.5; <sup>19</sup>F NMR (376 MHz, CDCl<sub>3</sub>) δ -39.08; HRGC (EI) *m/z*: calcd for C<sub>16</sub>H<sub>12</sub>BrF<sub>3</sub>OS 387.9739; Found 387.9744.

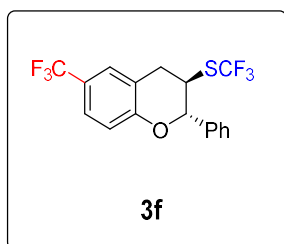

According to the general procedure **B**, the reaction time is 48 h, flash column chromatography (SiO<sub>2</sub>, PE) to afford **3f** as a white solid (22.7 mg, 60%), *R<sub>f</sub>*=0.5 (silica gel, PE); <sup>1</sup>H NMR (400 MHz, CDCl<sub>3</sub>) δ 7.47 (dd, *J* = 8.6, 2.2 Hz, 1H), 7.43 – 7.36 (m, 3H), 7.34 (d, *J* = 2.1 Hz, 1H), 7.29 (dd, *J* = 7.5, 2.1 Hz, 2H), 7.06 (d, *J* = 8.6 Hz, 1H), 5.36 (d, *J* = 5.6 Hz, 1H), 3.97 (q, *J* = 5.6 Hz, 1H), 3.21 (dd, *J* = 16.9, 4.9 Hz, 1H), 3.07 (dd, *J* = 16.9, 6.4 Hz, 1H). <sup>13</sup>C NMR (101 MHz, CDCl<sub>3</sub>) δ 156.1, 138.1, 130.8 (q, *J* = 308.2 Hz), 129.1, 129.0, 127.2 (q, *J* = 3.8 Hz), 126.1, 125.9 (q, *J* = 3.7 Hz), 124.3 (q, *J* = 272.3 Hz), 123.7 (d, *J* = 32.6 Hz), 119.3, 117.3, 80.1, 42.8 (d, *J* = 1.8 Hz), 30.5; <sup>19</sup>F NMR (376 MHz, CDCl<sub>3</sub>) δ -39.07, -61.65; HRGC (EI) *m/z*: calcd for C<sub>17</sub>H<sub>12</sub>F<sub>6</sub>OS 378.0508; Found 378.0512.

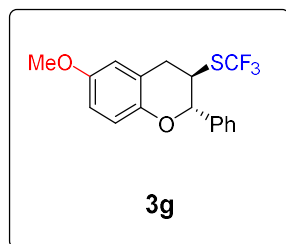

According to the general procedure **B**, the reaction time is 48 h, flash column chromatography (SiO<sub>2</sub>, PE) to afford **3g** as a white solid (26.5 mg, 78%), *R<sub>f</sub>*=0.3 (silica gel, PE); <sup>1</sup>H NMR (400 MHz, CDCl<sub>3</sub>) δ 7.41 – 7.29 (m, 5H), 6.91 (d, *J* = 8.9 Hz, 1H), 6.79 (dd, *J* = 8.9, 3.0 Hz, 1H), 6.58 (d, *J* = 3.0 Hz, 1H), 5.24 (d, *J* = 5.9 Hz, 1H), 3.94 (q, *J* = 6.0 Hz, 1H), 3.77 (s, 3H), 3.18 (dd, *J* = 16.8, 5.1 Hz, 1H), 3.03 (dd, *J* = 16.8, 6.6 Hz, 1H); <sup>13</sup>C NMR (101 MHz, CDCl<sub>3</sub>) δ 154.1, 147.5, 138.9, 131.0 (q, *J* = 308.0 Hz), 128.9, 128.7, 126.3, 119.5, 117.6, 114.8, 113.9, 79.6, 55.8, 43.5 (d, *J* = 1.7 Hz), 31.3; <sup>19</sup>F NMR (376 MHz, CDCl<sub>3</sub>) δ -39.04; HRMS (ESI) *m/z*: [M+Na]<sup>+</sup> calcd for C<sub>17</sub>H<sub>15</sub>F<sub>3</sub>NaO<sub>2</sub>S 363.0637; Found 363.0640.

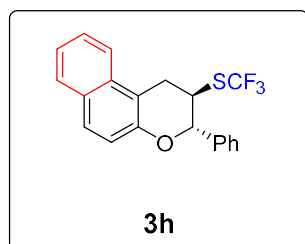

According to the general procedure **B**, the reaction time is 24 h, flash column chromatography (SiO<sub>2</sub>, PE) to afford **3h** as a white solid (24.3 mg, 67%), *R<sub>f</sub>*=0.5 (silica gel, PE); <sup>1</sup>H NMR (400 MHz, CDCl<sub>3</sub>) δ 7.83 (dd, *J* = 8.2, 1.2 Hz, 1H), 7.75 (dd, *J* = 8.7, 4.5 Hz, 2H), 7.53 (ddd, *J* = 8.4, 6.8, 1.3 Hz, 1H), 7.47 – 7.30 (m, 6H), 7.22 (d, *J* = 9.0 Hz, 1H), 5.35 (d, *J* = 6.2 Hz, 1H), 4.12 (q, *J* = 6.1 Hz, 1H), 3.44 (dd, *J* = 6.2, 2.7 Hz, 2H); <sup>13</sup>C NMR (101 MHz, CDCl<sub>3</sub>) δ 151.3, 138.4, 132.6, 131.1 (q, *J* = 308.0 Hz), 129.5, 129.1, 128.9, 128.8, 128.8, 127.0, 126.4, 124.0, 121.8, 118.6, 111.1, 79.6, 43.5 (d, *J* = 1.7 Hz), 28.1; <sup>19</sup>F NMR (376 MHz, CDCl<sub>3</sub>) δ -39.01; HRMS (ESI) *m/z*: [M+Na]<sup>+</sup> calcd for C<sub>20</sub>H<sub>15</sub>F<sub>3</sub>NaOS 383.0688; Found 383.0687.

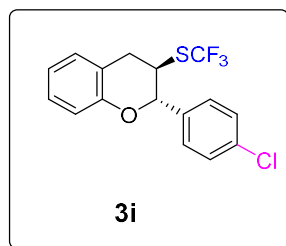

According to the general procedure **B**, the reaction time is 24 h, flash column chromatography (SiO<sub>2</sub>, PE) to afford **3i** as a white solid (23.2 mg, 67%), *R<sub>f</sub>*=0.5 (silica gel, PE); **<sup>1</sup>H NMR** (400 MHz, CDCl<sub>3</sub>) δ 7.43 – 7.32 (m, 2H), 7.31 – 7.26 (m, 2H), 7.25 – 7.17 (m, 1H), 7.06 (dt, *J* = 7.8, 1.2 Hz, 1H), 6.95 (t, *J* = 7.3 Hz, 2H), 5.21 (d, *J* = 6.4 Hz, 1H), 3.88 (td, *J* = 6.9, 5.2 Hz, 1H), 3.20 (dd, *J* = 16.7, 5.1 Hz, 1H), 3.07 (dd, *J* = 16.7, 7.2 Hz, 1H); **<sup>13</sup>C NMR** (101 MHz, CDCl<sub>3</sub>) δ 153.4, 137.2, 134.7, 130.8 (q, *J* = 308.2), 129.7, 129.1, 128.7, 127.9, 121.6, 119.0, 116.9, 79.3, 43.4 (d, *J* = 1.8 Hz), 31.3; **<sup>19</sup>F NMR** (376 MHz, CDCl<sub>3</sub>) δ -39.00; **HRMS** (ESI) *m/z*: [M+Na]<sup>+</sup> calcd for C<sub>16</sub>H<sub>12</sub>ClF<sub>3</sub>NaOS 367.0142; Found 367.0146.

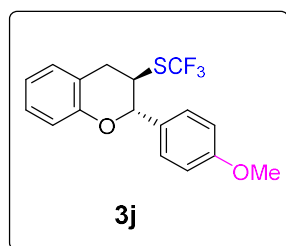

According to the general procedure **B**, the reaction time is 24 h, flash column chromatography (SiO<sub>2</sub>, PE) to afford **3j** as a white solid (30.0 mg, 88%), *R<sub>f</sub>*=0.3 (silica gel, PE); **<sup>1</sup>H NMR** (400 MHz, CDCl<sub>3</sub>) δ 7.32 – 7.25 (m, 2H), 7.21 (ddd, *J* = 8.4, 7.3, 1.7 Hz, 1H), 7.08 (dd, *J* = 7.5, 1.6 Hz, 1H), 7.00 – 6.89 (m, 4H), 5.18 (d, *J* = 6.7 Hz, 1H), 3.93 (td, *J* = 7.2, 5.1 Hz, 1H), 3.83 (s, 3H), 3.26 (dd, *J* = 16.6, 5.0 Hz, 1H), 3.11 (dd, *J* = 16.6, 7.5 Hz, 1H); **<sup>13</sup>C NMR** (101 MHz, CDCl<sub>3</sub>) δ 160.0, 153.8, 130.8 (q, *J* = 308.2 Hz), 130.7, 129.6, 128.5, 127.8, 121.4, 119.2, 116.9, 114.3, 79.5, 55.4, 43.8 (q, *J* = 1.5 Hz), 31.7; **<sup>19</sup>F NMR** (376 MHz, CDCl<sub>3</sub>) δ -38.77; **HRMS** (ESI) *m/z*: [M+Na]<sup>+</sup> calcd for C<sub>17</sub>H<sub>15</sub>F<sub>3</sub>NaO<sub>2</sub>S 363.0637; Found 363.0634.

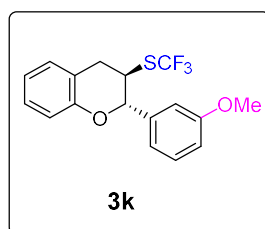

According to the general procedure **B**, the reaction time is 24 h, flash column chromatography (SiO<sub>2</sub>, PE) to afford **3k** as a colorless oil (27.9 mg, 82%), *R<sub>f</sub>*=0.3 (silica gel, PE); <sup>1</sup>H NMR (400 MHz, CDCl<sub>3</sub>) δ 7.31 (td, *J* = 7.5, 1.4 Hz, 1H), 7.21 (td, *J* = 7.7, 7.1, 1.6 Hz, 1H), 7.06 (dd, *J* = 7.6, 1.5 Hz, 1H), 7.02 – 6.85 (m, 5H), 5.26 (d, *J* = 5.9 Hz, 1H), 3.96 (q, *J* = 6.0 Hz, 1H), 3.79 (s, 3H), 3.21 (dd, *J* = 16.7, 5.0 Hz, 1H), 3.05 (dd, *J* = 16.7, 6.7 Hz, 1H); <sup>13</sup>C NMR (101 MHz, CDCl<sub>3</sub>) δ 160.0, 153.5, 140.3, 131.0 (q, *J* = 308.0 Hz), 130.0, 129.7, 128.6, 121.4, 119.0, 118.6, 116.8, 113.9, 112.2, 79.6, 55.4, 43.4 (d, *J* = 1.8 Hz), 31.0; <sup>19</sup>F NMR (376 MHz, CDCl<sub>3</sub>) δ -39.01; HRMS (ESI) *m/z*: [M+Na]<sup>+</sup> calcd for C<sub>17</sub>H<sub>15</sub>F<sub>3</sub>NaO<sub>2</sub>S 363.0637; Found 363.0637.

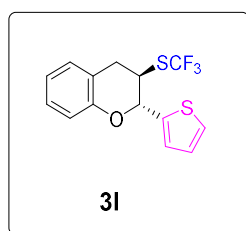

According to the general procedure **B**, the reaction time is 24 h, flash column chromatography (SiO<sub>2</sub>, PE) to afford **3l** as a white solid (24.5 mg, 77%), *R<sub>f</sub>*=0.5 (silica gel, PE); <sup>1</sup>H NMR (400 MHz, CDCl<sub>3</sub>) δ 7.32 (dd, *J* = 5.0, 1.3 Hz, 1H), 7.24 – 7.15 (m, 1H), 7.10 – 7.02 (m, 2H), 7.02 – 6.89 (m, 3H), 5.53 (d, *J* = 5.9 Hz, 1H), 3.96 (q, *J* = 6.1 Hz, 1H), 3.36 (dd, *J* = 16.9, 5.2 Hz, 1H), 3.11 (dd, *J* = 16.9, 6.4 Hz, 1H); <sup>13</sup>C NMR (101 MHz, CDCl<sub>3</sub>) δ 152.9, 141.5, 130.9 (q, *J* = 308.2 Hz), 129.7, 128.5, 127.0, 126.1, 126.0, 121.8, 118.7, 117.2, 76.1, 44.1 (q, *J* = 1.7 Hz), 31.1; <sup>19</sup>F NMR (376 MHz, CDCl<sub>3</sub>) δ -38.93; HRMS (ESI) *m/z*: [M+Na]<sup>+</sup> calcd for C<sub>14</sub>H<sub>11</sub>F<sub>3</sub>NaOS<sub>2</sub> 339.0096; Found 339.0093.

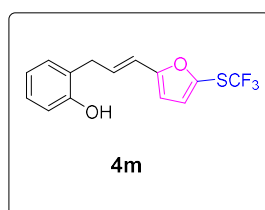

According to the general procedure **B**, the reaction time is 24 h, flash column chromatography (SiO<sub>2</sub>, PE:EA=30:1, v/v) to afford **4m** as a colorless oil (23.6 mg, 79%), *R<sub>f</sub>*=0.4 (silica gel, PE:DCM=3:1, v/v); <sup>1</sup>H NMR (400 MHz, CDCl<sub>3</sub>) δ 7.20 – 7.11 (m, 2H), 6.92 (td, *J* = 7.4, 1.2 Hz, 1H), 6.87 – 6.77 (m, 2H), 6.54 (dt, *J* = 15.8, 6.6 Hz, 1H), 6.31 – 6.16 (m, 2H), 4.90 (s, 1H), 3.55 (dd, *J* = 6.6, 1.7 Hz, 2H); <sup>13</sup>C NMR (101 MHz, CDCl<sub>3</sub>) δ 158.7, 153.8, 133.1 (q, *J* = 3.0 Hz), 131.1, 130.8, 128.2, 128.0 (q, *J* = 313.1 Hz), 125.5, 125.2, 121.3, 119.1, 115.8, 109.1, 33.6; <sup>19</sup>F NMR (376 MHz, CDCl<sub>3</sub>) δ -43.93; HRMS (ESI) *m/z*: [M+Na]<sup>+</sup> calcd for C<sub>14</sub>H<sub>11</sub>F<sub>3</sub>NaO<sub>2</sub>S 323.0324; Found 323.0319.

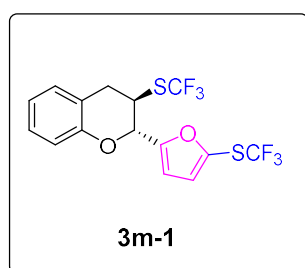

According to the general procedure **B**, the reaction time is 48 h, flash column chromatography (SiO<sub>2</sub>, PE) to afford **3m-1** as a colorless oil (16.7 mg, 42%), *R<sub>f</sub>*=0.3 (silica gel, PE); <sup>1</sup>H NMR (400 MHz, CDCl<sub>3</sub>) δ 7.22 – 7.15 (m, 1H), 7.07 – 7.02 (m, 1H), 6.98 – 6.91 (m, 2H), 6.88 (d, *J* = 3.4 Hz, 1H), 6.43 (dd, *J* = 3.4, 0.8 Hz, 1H), 5.42 – 5.20 (m, 1H), 4.12 (td, *J* = 6.3, 5.3 Hz, 1H), 3.21 (dd, *J* = 17.0, 5.3 Hz, 1H), 3.06 (dd, *J* = 16.9, 6.4 Hz, 1H); <sup>13</sup>C NMR (101 MHz, CDCl<sub>3</sub>) δ 157.0, 152.5, 135.7 (q, *J* = 3.03 Hz), 130.8 (q, *J* = 308.0 Hz), 129.8, 128.6, 128.0 (q, *J* = 313.0 Hz), 124.8, 122.0, 118.6, 117.0, 111.9, 73.8, 40.8 (d, *J* = 1.7 Hz), 31.1; <sup>19</sup>F NMR (376 MHz, CDCl<sub>3</sub>) δ -39.27, -43.62; HRMS (ESI) *m/z*: [M+Na]<sup>+</sup> calcd for C<sub>15</sub>H<sub>10</sub>F<sub>6</sub>NaO<sub>2</sub>S<sub>2</sub> 422.9919; Found 422.9917.

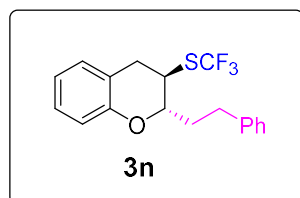

According to the general procedure **B**, the reaction time is 24 h, flash column chromatography (SiO<sub>2</sub>, PE) to afford **3n** as a colorless oil (12.5 mg, 37%), *R<sub>f</sub>*=0.5 (silica gel, PE); <sup>1</sup>H NMR (400 MHz, CDCl<sub>3</sub>) δ 7.39 – 7.27 (m, 2H), 7.25 – 7.21 (m,



3H), 7.21 – 7.14 (m, 1H), 7.06 (dd,  $J = 7.6, 1.6$  Hz, 1H), 6.99 – 6.82 (m, 2H), 4.16 (ddd,  $J = 9.5, 6.2, 3.7$  Hz, 1H), 3.59 (td,  $J = 6.7, 5.5$  Hz, 1H), 3.34 (dd,  $J = 16.9, 5.4$  Hz, 1H), 3.06 (dd,  $J = 17.0, 6.9$  Hz, 1H), 2.95 (ddd,  $J = 14.3, 9.2, 5.3$  Hz, 1H), 2.82 (ddd,  $J = 13.8, 9.1, 7.3$  Hz, 1H), 2.19 – 1.97 (m, 2H);  $^{13}\text{C}$  NMR (101 MHz,  $\text{CDCl}_3$ )  $\delta$  152.9, 141.1, 131.1 (q,  $J = 308.0$  Hz), 129.6, 128.7, 128.3, 126.3, 121.3 (d,  $J = 3.7$  Hz), 119.1, 117.3, 76.7 (d,  $J = 11.8$  Hz), 42.2 (d,  $J = 4.2$  Hz), 34.6, 31.6, 31.4;  $^{19}\text{F}$  NMR (376 MHz,  $\text{CDCl}_3$ )  $\delta$  -39.05; HRMS (ESI)  $m/z$ :  $[\text{M}+\text{Na}]^+$  calcd for  $\text{C}_{18}\text{H}_{17}\text{F}_3\text{NaOS}$  361.0844; Found 361.0845.

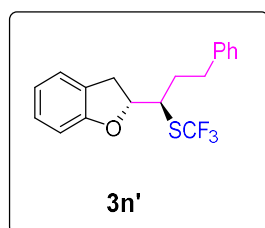

According to the general procedure **B**, the reaction time is 24 h, flash column chromatography ( $\text{SiO}_2$ , PE) to afford **3n'** as a colorless oil (14 mg, 41%),  $R_f=0.4$  (silica gel, PE);  $^1\text{H}$  NMR (400 MHz,  $\text{CDCl}_3$ )  $\delta$  7.37 – 7.28 (m, 2H), 7.23 (td,  $J = 5.2, 2.8$  Hz, 3H), 7.20 – 7.10 (m, 2H), 6.88 (td,  $J = 7.4, 1.0$  Hz, 1H), 6.80 (d,  $J = 8.0$  Hz, 1H), 5.03 – 4.88 (m, 1H), 3.44 – 3.29 (m, 2H), 3.14 – 2.95 (m, 2H), 2.78 (ddd,  $J = 13.8, 9.7, 6.9$  Hz, 1H), 2.32 – 2.16 (m, 1H), 2.04 – 1.90 (m, 1H);  $^{13}\text{C}$  NMR (101 MHz,  $\text{CDCl}_3$ )  $\delta$  159.4, 140.8, 131.0 (q,  $J = 307.8$  Hz), 128.7, 128.6, 128.4, 126.4, 125.9, 125.0, 121.0, 109.6, 84.0, 50.2, 33.9, 32.6, 32.4;  $^{19}\text{F}$  NMR (376 MHz,  $\text{CDCl}_3$ )  $\delta$  -38.31; HRMS (ESI)  $m/z$ :  $[\text{M}+\text{Na}]^+$  calcd for  $\text{C}_{18}\text{H}_{17}\text{F}_3\text{NaOS}$  361.0844; Found 361.0839.

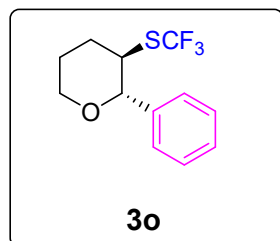

According to the general procedure **B**, the reaction time is 24 h, flash column chromatography ( $\text{SiO}_2$ , PE) to afford **3o** as a colorless oil (13.1 mg, 50%),  $R_f=0.2$  (silica gel, PE);  $^1\text{H}$  NMR (400 MHz,  $\text{CDCl}_3$ )  $\delta$  7.39 – 7.30 (m, 5H), 4.18 (d,  $J = 10.2$  Hz, 1H), 4.15 – 4.07 (m, 1H), 3.61 (td,  $J = 11.6, 2.4$  Hz, 1H), 3.33 (ddd,  $J = 11.6, 10.2, 4.0$  Hz, 1H), 2.60 – 2.42 (m, 1H), 2.00 – 1.87 (m, 2H), 1.82 – 1.74 (m, 1H);  $^{13}\text{C}$  NMR (101

MHz, CDCl<sub>3</sub>)  $\delta$  139.1, 130.7 (q,  $J$  = 308.4 Hz), 128.8, 128.6, 127.6, 83.7, 68.7, 47.5, 33.3, 27.0; **<sup>19</sup>F NMR** (376 MHz, CDCl<sub>3</sub>)  $\delta$  -38.01; **HRMS** (ESI)  $m/z$ : [M+Na]<sup>+</sup> calcd for C<sub>12</sub>H<sub>13</sub>F<sub>3</sub>NaOS 285.0531; Found 285.0531.

#### 4. General procedures C for preparing desired products 6

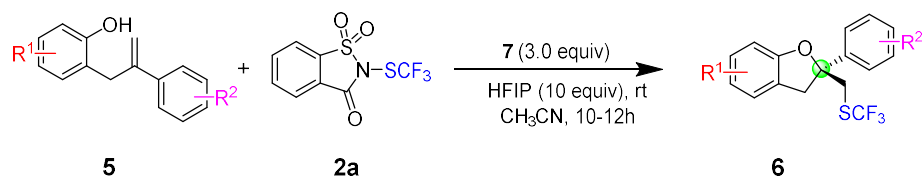

At room temperature, **5** (0.1 mmol) and **2a** (0.13 mmol) were added into an over-dried 10 mL flask equipped with a stir bar. Seal the flask with a septum. Anhydrous CH<sub>3</sub>CN (1 mL) was added via a syringe, and then **7** (38.0  $\mu$ L, 0.3 mmol) and HFIP (105.0  $\mu$ L, 1.0 mmol) were added by using syringes respectively and stirred for 10-12 hours. After the reaction was completed (monitored by TLC), the solvent was removed under reduce pressure, the crude product was purified by silica gel flash column chromatography to obtain products **6**.

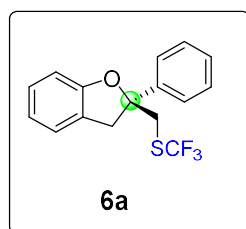

According to the general procedure **C**, the reaction time is 10 h, flash column chromatography (SiO<sub>2</sub>, PE) to afford **6a** as a colorless oil (26.4 mg, 85%),  $R_f$ =0.5 (silica gel, PE); **<sup>1</sup>H NMR** (400 MHz, CDCl<sub>3</sub>)  $\delta$  7.53 – 7.44 (m, 2H), 7.43 – 7.36 (m, 2H), 7.35 – 7.28 (m, 1H), 7.22 – 7.12 (m, 2H), 6.98 – 6.86 (m, 2H), 3.70 (d,  $J$  = 15.7 Hz, 1H), 3.57 – 3.48 (m, 3H); **<sup>13</sup>C NMR** (101 MHz, CDCl<sub>3</sub>)  $\delta$  158.4, 143.3, 131.0 (q,  $J$  = 307.2 Hz), 128.8, 128.6, 128.2, 125.6, 125.1, 125.1, 121.4, 110.0, 89.2, 42.3, 41.2 (d,  $J$  = 1.9 Hz); **<sup>19</sup>F NMR** (376 MHz, CDCl<sub>3</sub>)  $\delta$  -41.19; **HRMS** (ESI)  $m/z$ : [M+Na]<sup>+</sup> calcd for C<sub>16</sub>H<sub>13</sub>F<sub>3</sub>NaOS 333.0531; Found 333.0530.

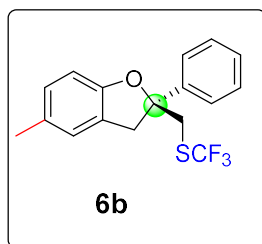

According to the general procedure **C**, the reaction time is 10 h, flash column chromatography (SiO<sub>2</sub>, PE) to afford **6b** as a colorless oil (22.9 mg, 71%), *R<sub>f</sub>*=0.5 (silica gel, PE); <sup>1</sup>H NMR (400 MHz, CDCl<sub>3</sub>) δ 7.51 – 7.43 (m, 2H), 7.42 – 7.34 (m, 2H), 7.34 – 7.27 (m, 1H), 6.97 (d, *J* = 7.4 Hz, 2H), 6.82 (d, *J* = 8.7 Hz, 1H), 3.67 (d, *J* = 15.7 Hz, 1H), 3.57 – 3.44 (m, 3H), 2.28 (s, 3H); <sup>13</sup>C NMR (126 MHz, CDCl<sub>3</sub>) δ 156.3, 143.4, 131.1 (q, *J* = 306.8 Hz), 130.8, 129.0, 128.8, 128.1, 125.6, 125.6, 125.1, 109.5, 89.2, 42.4, 41.1 (d, *J* = 2.0 Hz), 20.9; <sup>19</sup>F NMR (376 MHz, CDCl<sub>3</sub>) δ -41.21; HRMS (ESI) *m/z*: [M+Na]<sup>+</sup> calcd for C<sub>17</sub>H<sub>15</sub>F<sub>3</sub>NaOS 347.0688; Found 347.0686.

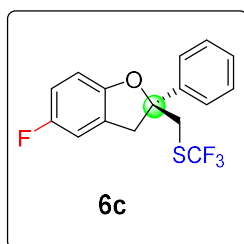

According to the general procedure **C**, the reaction time is 10 h, flash column chromatography (SiO<sub>2</sub>, PE) to afford **6c** as a colorless oil (19.7 mg, 60%), *R<sub>f</sub>*=0.6 (silica gel, PE); <sup>1</sup>H NMR (400 MHz, CDCl<sub>3</sub>) δ 7.49 – 7.43 (m, 2H), 7.43 – 7.35 (m, 2H), 7.36 – 7.29 (m, 1H), 6.94 – 6.73 (m, 3H), 3.70 (dd, *J* = 16.0, 1.0 Hz, 1H), 3.61 – 3.40 (m, 3H); <sup>13</sup>C NMR (101 MHz, CDCl<sub>3</sub>) δ 158.0 (d, *J* = 239.0 Hz), 154.4 (d, *J* = 1.61 Hz), 143.0, 130.9 (q, *J* = 307.3 Hz), 128.9, 128.3, 127.0 (d, *J* = 9.1 Hz), 125.0, 114.8 (d, *J* = 24.2 Hz), 112.2 (d, *J* = 25.0 Hz), 110.1 (d, *J* = 8.5 Hz), 89.9, 42.4 (d, *J* = 1.6 Hz), 41.1 (d, *J* = 2.0 Hz); <sup>19</sup>F NMR (376 MHz, CDCl<sub>3</sub>) δ -41.18, -123.40; HRMS (ESI) *m/z*: [M+Na]<sup>+</sup> calcd for C<sub>16</sub>H<sub>12</sub>F<sub>4</sub>NaOS 351.0437; Found 351.0439.

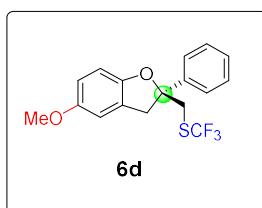

According to the general procedure **C**, the reaction time is 10 h, flash column

chromatography (SiO<sub>2</sub>, PE) to afford **6d** as a colorless oil (24.3 mg, 71%), *R<sub>f</sub>*=0.3 (silica gel, PE); **<sup>1</sup>H NMR** (400 MHz, CDCl<sub>3</sub>) δ 7.50 – 7.46 (m, 2H), 7.43 – 7.36 (m, 2H), 7.35 – 7.27 (m, 1H), 6.85 (d, *J* = 8.4 Hz, 1H), 6.80 – 6.66 (m, 2H), 3.75 (s, 3H), 3.69 (d, *J* = 15.8 Hz, 1H), 3.57 – 3.46 (m, 3H); **<sup>13</sup>C NMR** (101 MHz, CDCl<sub>3</sub>) δ 154.8, 152.5, 143.3, 131.0 (q, *J* = 307.3 Hz), 128.8, 128.1, 126.6, 125.1, 113.6, 111.2, 109.9, 89.3, 56.1, 42.7, 41.1 (d, *J* = 1.82 Hz); **<sup>19</sup>F NMR** (376 MHz, CDCl<sub>3</sub>) δ -41.19; **HRMS** (ESI) *m/z*: [M+Na]<sup>+</sup> calcd for C<sub>17</sub>H<sub>15</sub>F<sub>3</sub>NaO<sub>2</sub>S 363.0637; Found 363.0637.

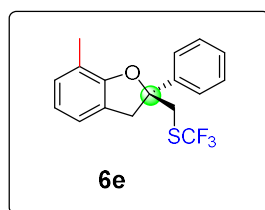

According to the general procedure C, the reaction time is 10 h, flash column chromatography (SiO<sub>2</sub>, PE) to afford **6e** as a colorless oil (26.2 mg, 81%), *R<sub>f</sub>*=0.5 (silica gel, PE); **<sup>1</sup>H NMR** (400 MHz, CDCl<sub>3</sub>) δ 7.52 – 7.45 (m, 2H), 7.44 – 7.35 (m, 2H), 7.35 – 7.28 (m, 1H), 6.99 (t, *J* = 7.2 Hz, 2H), 6.81 (t, *J* = 7.4 Hz, 1H), 3.70 (d, *J* = 15.6 Hz, 1H), 3.57 – 3.47 (m, 3H), 2.33 (s, 3H); **<sup>13</sup>C NMR** (126 MHz, CDCl<sub>3</sub>) δ 156.8, 143.5, 131.0 (q, *J* = 307.0 Hz), 129.8, 128.8, 128.1, 125.1, 124.8, 122.3, 121.2, 120.2, 88.7, 42.7, 41.3, 15.3; **<sup>19</sup>F NMR** (376 MHz, CDCl<sub>3</sub>) δ -41.12; **HRMS** (ESI) *m/z*: [M+Na]<sup>+</sup> calcd for C<sub>17</sub>H<sub>15</sub>F<sub>3</sub>NaOS 347.0688; Found 347.0687.

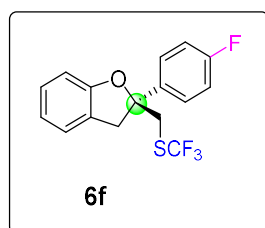

According to the general procedure C, the reaction time is 11 h, flash column chromatography (SiO<sub>2</sub>, PE) to afford **6f** as a colorless oil (22.1 mg, 67%), *R<sub>f</sub>*=0.5 (silica gel, PE); **<sup>1</sup>H NMR** (400 MHz, CDCl<sub>3</sub>) δ 7.52 – 7.39 (m, 2H), 7.24 – 7.13 (m, 2H), 7.13 – 7.00 (m, 2H), 6.97 – 6.83 (m, 2H), 3.68 (d, *J* = 15.7 Hz, 1H), 3.53 – 3.44 (m, 3H); **<sup>13</sup>C NMR** (101 MHz, CDCl<sub>3</sub>) δ 162.5 (d, *J* = 248.0 Hz), 158.2, 139.0 (d, *J* = 3.2 Hz), 130.9 (q, *J* = 307.2 Hz), 127.1, 127.0, 125.4, 125.1, 121.6, 115.7 (d, *J* = 21.7 Hz), 110.0, 88.9, 42.4, 41.1; **<sup>19</sup>F NMR** (376 MHz, CDCl<sub>3</sub>) δ -41.19, -114.20; **HRMS** (ESI) *m/z*:

$[M+Na]^+$  calcd for  $C_{16}H_{12}F_4NaOS$  351.0437; Found 351.0436.

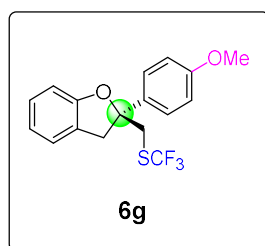

According to the general procedure **C**, the reaction time is 10 h, flash column chromatography ( $SiO_2$ , PE) to afford **6g** as a colorless oil (26.1 mg, 77%),  $R_f=0.3$  (silica gel, PE);  $^1H$  NMR (400 MHz,  $CDCl_3$ )  $\delta$  7.47 – 7.33 (m, 2H), 7.23 – 7.09 (m, 2H), 7.01 – 6.80 (m, 4H), 3.81 (s, 3H), 3.67 (d,  $J = 15.6$  Hz, 1H), 3.55 – 3.45 (m, 3H);  $^{13}C$  NMR (101 MHz,  $CDCl_3$ )  $\delta$  159.4, 158.4, 135.2, 131.0 (q,  $J = 307.2$  Hz), 128.6, 126.4, 125.7, 125.1, 121.3, 114.1, 109.9, 89.1, 55.4, 42.3, 41.2 (d,  $J = 2.0$  Hz);  $^{19}F$  NMR (376 MHz,  $CDCl_3$ )  $\delta$  -41.14; HRMS (ESI)  $m/z$ :  $[M+Na]^+$  calcd for  $C_{17}H_{15}F_3NaO_2S$  363.0637; Found 363.0639.

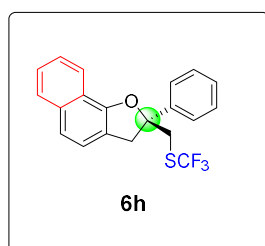

According to the general procedure **C**, the reaction time is 12 h, flash column chromatography ( $SiO_2$ , PE) to afford **6h** as a colorless oil (23.1 mg, 64%),  $R_f=0.6$  (silica gel, PE);  $^1H$  NMR (400 MHz,  $CDCl_3$ )  $\delta$  8.15 (d,  $J = 8.1$  Hz, 1H), 7.85 (d,  $J = 8.1$  Hz, 1H), 7.62 – 7.37 (m, 7H), 7.37 – 7.26 (m, 2H), 3.89 (d,  $J = 15.5$  Hz, 1H), 3.73 – 3.59 (m, 3H);  $^{13}C$  NMR (101 MHz,  $CDCl_3$ )  $\delta$  153.6, 143.6, 134.3, 131.0 (q,  $J = 307.3$  Hz), 128.8, 128.2, 128.1, 126.1, 125.8, 125.0, 122.7, 121.6, 121.3, 120.6, 118.6, 90.0, 43.4, 41.4 (d,  $J = 1.8$  Hz);  $^{19}F$  NMR (376 MHz,  $CDCl_3$ )  $\delta$  -41.00; HRMS (ESI)  $m/z$ :  $[M+Na]^+$  calcd for  $C_{20}H_{15}F_3NaOS$  383.0688; Found 383.0692.

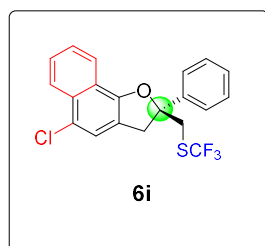

According to the general procedure **C**, the reaction time is 10 h, flash column

chromatography (SiO<sub>2</sub>, PE) to afford **6i** as a colorless oil (17.4 mg, 44%), *R<sub>f</sub>*=0.5 (silica gel, PE); <sup>1</sup>H NMR (400 MHz, CDCl<sub>3</sub>) δ 8.26 – 8.18 (m, 1H), 8.18 – 8.05 (m, 1H), 7.62 – 7.56 (m, 2H), 7.56 – 7.49 (m, 2H), 7.45 – 7.35 (m, 3H), 7.36 – 7.29 (m, 1H), 3.87 (d, *J* = 15.6 Hz, 1H), 3.68 (d, *J* = 13.1 Hz, 1H), 3.65 – 3.56 (m, 2H); <sup>13</sup>C NMR (126 MHz, CDCl<sub>3</sub>) δ 152.9, 143.2, 130.9, 130.9 (q, *J* = 306.8 Hz), 128.9, 128.4, 127.2, 126.6, 125.0, 125.0, 123.9, 122.9, 122.1, 121.3, 118.8, 90.5, 43.1, 41.3; <sup>19</sup>F NMR (376 MHz, CDCl<sub>3</sub>) δ -41.01; HRMS (ESI) *m/z*: [M+Na]<sup>+</sup> calcd for C<sub>20</sub>H<sub>14</sub>ClF<sub>3</sub>NaOS 417.0298; Found 417.0304.

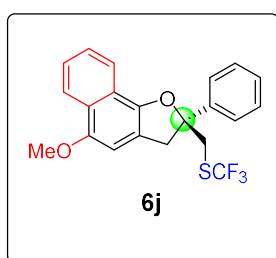

According to the general procedure C, the reaction time is 10 h, flash column chromatography (SiO<sub>2</sub>, PE) to afford **6j** as a colorless oil (26.1 mg, 67%), *R<sub>f</sub>*=0.3 (silica gel, PE); <sup>1</sup>H NMR (400 MHz, CDCl<sub>3</sub>) δ 8.24 (d, *J* = 8.5 Hz, 1H), 8.08 (d, *J* = 8.2 Hz, 1H), 7.58 – 7.55 (m, 3H), 7.49 (ddd, *J* = 8.2, 6.8, 1.3 Hz, 1H), 7.44 – 7.36 (m, 2H), 7.36 – 7.30 (m, 1H), 6.67 (s, 1H), 3.95 (s, 3H), 3.87 (d, *J* = 15.5 Hz, 1H), 3.72 – 3.53 (m, 3H); <sup>13</sup>C NMR (101 MHz, CDCl<sub>3</sub>) δ 150.8, 147.2, 143.8, 131.1 (q, *J* = 307.2 Hz), 128.8, 128.1, 126.5, 125.7, 125.4, 125.1, 122.7 (d, *J* = 5.4 Hz), 121.3, 121.1, 117.4, 101.2 (d, *J* = 10.8 Hz), 89.4, 56.1 (d, *J* = 15.4 Hz), 44.0, 41.3; <sup>19</sup>F NMR (376 MHz, CDCl<sub>3</sub>) δ -41.05; HRMS (ESI) *m/z*: [M+Na]<sup>+</sup> calcd. for C<sub>21</sub>H<sub>17</sub>F<sub>3</sub>NaO<sub>2</sub>S 413.0794; Found 413.0791.

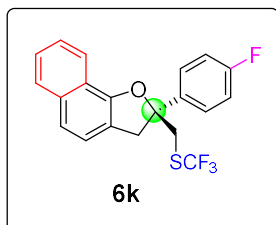

According to the general procedure C, the reaction time is 10 h, flash column chromatography (SiO<sub>2</sub>, PE) to afford **6k** as a colorless oil (26.5 mg, 70%), *R<sub>f</sub>*=0.5 (silica gel, PE); <sup>1</sup>H NMR (400 MHz, CDCl<sub>3</sub>) δ 8.10 (dd, *J* = 8.2, 1.4 Hz, 1H), 7.88 –

7.80 (m, 1H), 7.59 – 7.41 (m, 5H), 7.29 (d,  $J = 8.3$  Hz, 1H), 7.08 (t,  $J = 8.7$  Hz, 2H), 3.86 (d,  $J = 15.4$  Hz, 1H), 3.65 (d,  $J = 15.5$  Hz, 1H), 3.59 (s, 2H);  $^{13}\text{C}$  NMR (126 MHz,  $\text{CDCl}_3$ )  $\delta$  162.5 (d,  $J = 247.4$  Hz), 153.4, 139.3 (d,  $J = 3.3$  Hz), 134.3, 130.9 (q,  $J = 306.9$  Hz), 128.1, 127.0, 127.0, 126.2, 125.9, 122.6, 121.5 (d,  $J = 4.0$  Hz), 120.6, 118.4, 115.7 (d,  $J = 21.8$  Hz), 89.7, 43.5, 41.6;  $^{19}\text{F}$  NMR (376 MHz,  $\text{CDCl}_3$ )  $\delta$  -41.05, -114.18; HRMS (ESI)  $m/z$ :  $[\text{M}+\text{Na}]^+$  calcd for  $\text{C}_{20}\text{H}_{14}\text{F}_4\text{NaOS}$  401.0594; Found 401.0594.

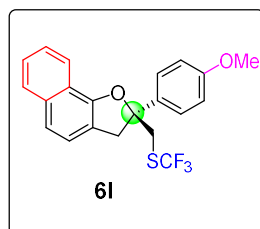

According to the general procedure C, the reaction time is 11 h, flash column chromatography ( $\text{SiO}_2$ , PE) to afford **6I** as a colorless oil (17.8 mg, 46%),  $R_f$ =0.3 (silica gel, PE);  $^1\text{H}$  NMR (400 MHz,  $\text{CDCl}_3$ )  $\delta$  8.10 (d,  $J = 8.1$  Hz, 1H), 7.82 (d,  $J = 7.6$  Hz, 1H), 7.54 – 7.39 (m, 5H), 7.29 (s, 1H), 6.96 – 6.86 (m, 2H), 3.84 (d,  $J = 15.5$  Hz, 1H), 3.80 (s, 3H), 3.65 (d,  $J = 15.5$  Hz, 1H), 3.62 – 3.52 (m, 2H);  $^{13}\text{C}$  NMR (101 MHz,  $\text{CDCl}_3$ )  $\delta$  159.4, 153.6, 135.6, 134.3, 131.0 (q,  $J = 307.3$  Hz), 128.1, 126.4, 126.0, 125.7, 122.7, 121.6, 121.2, 120.6, 118.7, 114.1, 89.9, 55.4, 43.3, 41.4 (d,  $J = 2.02$  Hz);  $^{19}\text{F}$  NMR (376 MHz,  $\text{CDCl}_3$ )  $\delta$  -41.05; HRMS (ESI)  $m/z$ :  $[\text{M}+\text{Na}]^+$  calcd for  $\text{C}_{21}\text{H}_{17}\text{F}_3\text{NaO}_2\text{S}$  413.0794; Found 413.0793.

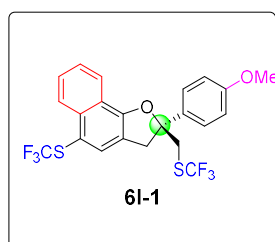

According to the general procedure C, the reaction time is 11 h, flash column chromatography ( $\text{SiO}_2$ , PE) to afford **6I-1** as a colorless oil (16.9 mg, 34%),  $R_f$ =0.4 (silica gel, PE);  $^1\text{H}$  NMR (400 MHz,  $\text{CDCl}_3$ )  $\delta$  8.50 (d,  $J = 8.4$  Hz, 1H), 8.16 (d,  $J = 7.4$  Hz, 1H), 7.79 (s, 1H), 7.67 – 7.57 (m, 2H), 7.44 (d,  $J = 8.8$  Hz, 2H), 6.98 – 6.86 (m, 2H), 3.87 (d,  $J = 15.8$  Hz, 1H), 3.80 (s, 3H), 3.70 (d,  $J = 15.6$  Hz, 1H), 3.67 – 3.55 (m, 2H);  $^{13}\text{C}$  NMR (101 MHz,  $\text{CDCl}_3$ )  $\delta$  159.7, 157.3, 136.4, 135.2, 134.8, 130.8 (q,  $J = 307.4$  Hz), 129.8 (q,  $J = 311.0$  Hz), 128.0, 126.5, 126.5, 126.3, 122.3, 121.2, 119.2,

114.3, 112.8, 91.2, 55.5, 42.7, 41.4; **<sup>19</sup>F NMR** (376 MHz, CDCl<sub>3</sub>) δ -40.96, -43.26.

**HRMS** (ESI) m/z: [M+Na]<sup>+</sup> calcd for C<sub>22</sub>H<sub>16</sub>F<sub>6</sub>NaO<sub>2</sub>S<sub>2</sub> 513.0388; Found 513.0388.

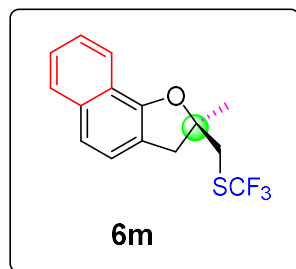

According to the general procedure **C**, the reaction time is 10 h, flash column chromatography (SiO<sub>2</sub>, PE) to afford **6m** as a colorless oil (4.0 mg, 13%), R<sub>f</sub>=0.5 (silica gel, PE); **<sup>1</sup>H NMR** (400 MHz, CDCl<sub>3</sub>) δ 8.02 – 7.87 (m, 1H), 7.85 – 7.73 (m, 1H), 7.50 – 7.37 (m, 3H), 7.30 (d, *J* = 8.2 Hz, 1H), 3.43 (d, *J* = 15.6 Hz, 1H), 3.34 (s, 2H), 3.25 (d, *J* = 15.6 Hz, 1H), 1.68 (s, 3H); **<sup>13</sup>C NMR** (101 MHz, CDCl<sub>3</sub>) δ 153.7, 134.2, 131.1 (q, *J* = 306.84 Hz), 128.0, 126.0, 125.6, 122.9, 121.6, 120.7, 120.7, 118.8, 87.4, 41.8, 39.9 (d, *J* = 1.92 Hz), 26.2; **<sup>19</sup>F NMR** (376 MHz, CDCl<sub>3</sub>) δ -41.09; **HRMS** (ESI) m/z: [M+H]<sup>+</sup> calcd for C<sub>15</sub>H<sub>14</sub>F<sub>3</sub>OS 299.0712; Found 299.0715.

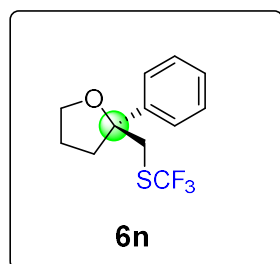

According to the general procedure **B**, the reaction time is 10 h, flash column chromatography (SiO<sub>2</sub>, PE) to afford **6n** as a colorless oil (10.7 mg, 41%), R<sub>f</sub>=0.5 (silica gel, PE); **<sup>1</sup>H NMR** (400 MHz, CDCl<sub>3</sub>) δ 7.43 – 7.32 (m, 4H), 7.31 – 7.27 (m, 1H), 4.06 – 3.99 (m, 1H), 3.95 – 3.90 (m, 1H), 3.39 (d, *J* = 12.6 Hz, 1H), 3.27 (d, *J* = 12.7 Hz, 1H), 2.42 – 2.35 (m, 1H), 2.29 – 2.23 (m, 1H), 2.11 – 1.95 (m, 1H), 1.90 – 1.79 (m, 1H); **<sup>13</sup>C NMR** (101 MHz, CDCl<sub>3</sub>) δ 144.7, 131.3 (q, *J* = 306.84 Hz), 128.6, 127.6, 125.2, 85.1, 68.7, 41.4, 37.0, 26.0; **<sup>19</sup>F NMR** (376 MHz, CDCl<sub>3</sub>) δ -41.43; **HRMS** (ESI) m/z: [M+Na]<sup>+</sup> calcd for C<sub>12</sub>H<sub>13</sub>F<sub>3</sub>NaOS 285.0531; Found 285.0531.



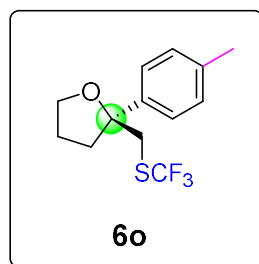

According to the general procedure **B**, the reaction time is 10 h, flash column chromatography (SiO<sub>2</sub>, PE) to afford **6o** as a colorless oil (11.7 mg, 43%), *R<sub>f</sub>*=0.4 (silica gel, PE); <sup>1</sup>H NMR (400 MHz, CDCl<sub>3</sub>) δ 7.27 (d, *J* = 2.0 Hz, 1H), 7.26 - 7.25 (m, 1H), 7.20 - 7.09 (m, 2H), 4.05 - 3.99 (m, 1H), 3.94 - 3.88 (m, 1H), 3.38 (d, *J* = 12.4 Hz, 1H), 3.26 (d, *J* = 12.4 Hz, 1H), 2.44 - 2.30 (m, 4H), 2.27 - 2.21 (m, 1H), 2.08 - 1.96 (m, 1H), 1.89 - 1.78 (m, 1H); <sup>13</sup>C NMR (101 MHz, CDCl<sub>3</sub>) δ 141.7, 137.3, 131.4 (q, *J* = 306.84 Hz), 129.3, 125.2, 85.0, 68.6, 41.5 (d, *J* = 1.72 Hz), 36.9, 26.0, 21.2; <sup>19</sup>F NMR (376 MHz, CDCl<sub>3</sub>) δ -41.42; HRMS (ESI) *m/z*: [M+Na]<sup>+</sup> calcd for C<sub>13</sub>H<sub>15</sub>F<sub>3</sub>NaOS 299.0688; Found 299.0688.

## 5. 1 Mmol scale reactions and 5 mmol scale reactions

**5.1** The procedure for the 1 mmol scale reaction for the synthesis of **3j**.

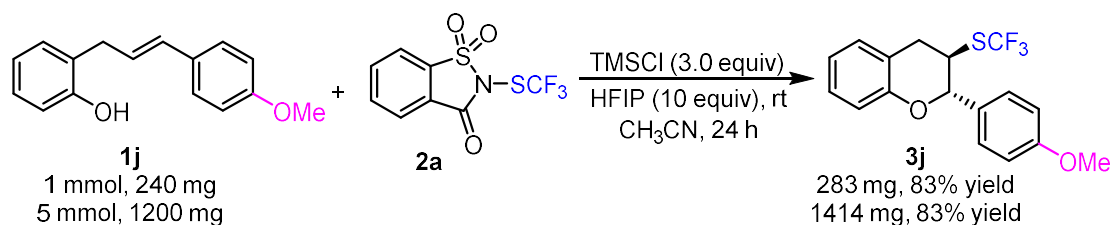

At room temperature, **1j** (240.3 mg, 1.0 mmol) and **2a** (368 mg, 1.3 mmol) were added into an over-dried 50 mL flask equipped with a stir bar. Seal the flask with a septum. Anhydrous CH<sub>3</sub>CN (10 mL) was added via a syringe, then TMSCl (380 μL, 3.0 mmol) and HFIP (1053 μL, 10 mmol) were added by using syringes respectively and stirred for 24 hours. After the reaction was completed (monitored by TLC), the crude product was purified by silica gel flash column chromatography (SiO<sub>2</sub>, PE) to afford **3j** as a white solid (283 mg, 83%), *R<sub>f</sub>*=0.5 (silica gel, PE).

The procedure of 1 gram-scale reaction (5 mmol) is the same, using **1j** (1200 mg), **2a** (1840 mg), CH<sub>3</sub>CN (50 mL), TMSCl (1.9 mL) and HFIP (5.3 mL). Product **3j** was obtained with 83% yield (1414 mg).

## 5.2 The procedure for the 1 mmol scale reaction for the synthesis of **6f**.

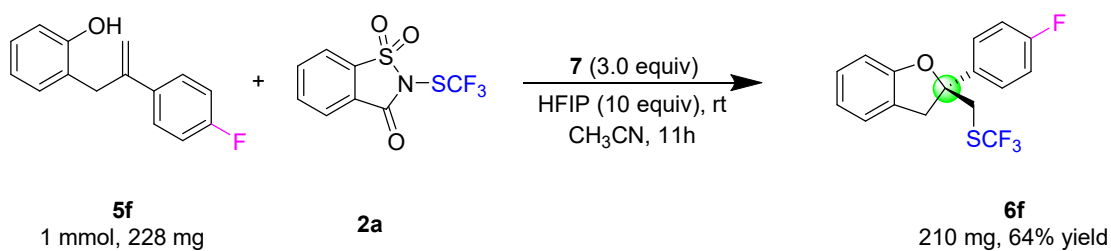

At room temperature, **5f** (228 mg, 1.0 mmol) and **2a** (368 mg, 1.3 mmol) were added into an over-dried 50 mL flask equipped with a stir bar. Seal the flask with a septum. Anhydrous CH<sub>3</sub>CN (10 mL) was added via a syringe, then **7** (335  $\mu$ L, 3.0 mmol) and HFIP (1053  $\mu$ L, 10 mmol) were added by using syringes respectively and stirred for 11 hours. After the reaction was completed (monitored by TLC), the crude product was purified by silica gel flash column chromatography (SiO<sub>2</sub>, PE) to afford **6f** as a colorless oil (210 mg, 64%),  $R_f$ =0.5 (silica gel, PE).

## 6. Crystals of **3a**.

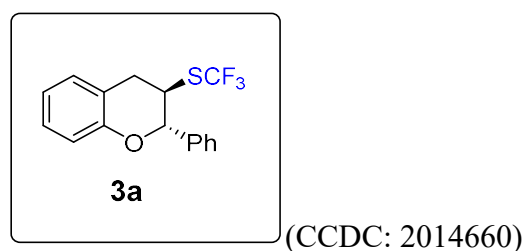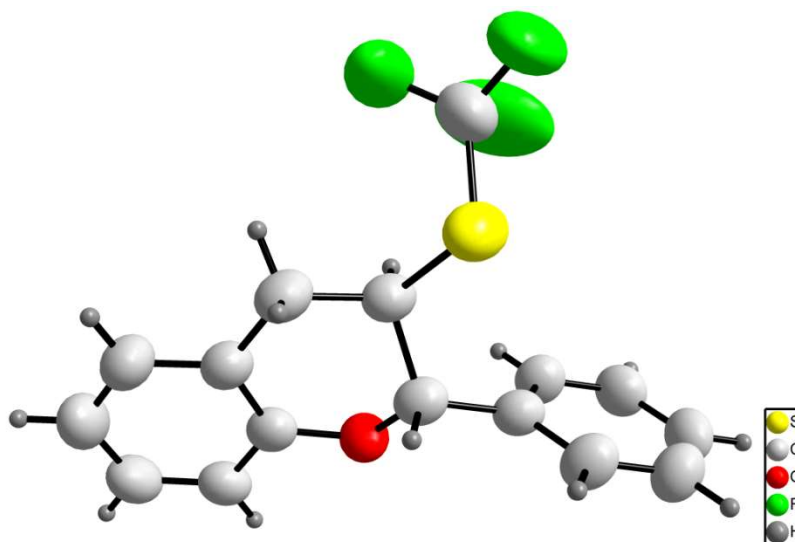

X-ray single crystal structures of **3a** with thermal ellipsoids drawn at the 50% probability level.

Procedure for the recrystallization of **3a**: To a 10 mL vial containing **3a** (20 mg), was added petroleum ether to form a clear solution. The solution was kept aside 3 days at room temperature to obtain crystals by slow evaporation. A suitable crystal was selected on a Bruker D8 VENTURE diffractometer. The crystal data was shown in Table S1:

Table S1. Crystal data and structure refinement for **3a**

|                                   |                                                                                                                       |
|-----------------------------------|-----------------------------------------------------------------------------------------------------------------------|
| Identification code               | <b>3a</b>                                                                                                             |
| Empirical formula                 | C <sub>16</sub> H <sub>13</sub> F <sub>3</sub> O S                                                                    |
| Formula weight                    | 310.32                                                                                                                |
| Temperature                       | 297(2) K                                                                                                              |
| Wavelength                        | 1.54178 Å                                                                                                             |
| Crystal system, space group       | Monoclinic, P2(1)/c                                                                                                   |
| Unit cell dimensions              | a = 11.710(2) Å    alpha = 90 deg.<br>b = 5.6555(9) Å    beta = 94.522(13) deg.<br>c = 22.119(3) Å    gamma = 90 deg. |
| Volume                            | 1460.3(4) Å <sup>3</sup>                                                                                              |
| Z, Calculated density             | 4, 1.411 Mg/m <sup>3</sup>                                                                                            |
| Absorption coefficient            | 2.250 mm <sup>-1</sup>                                                                                                |
| F(000)                            | 640                                                                                                                   |
| Crystal size                      | 0.180 x 0.160 x 0.140 mm                                                                                              |
| Theta range for data collection   | 4.009 to 68.245 deg.                                                                                                  |
| Limiting indices                  | -14 ≤ h ≤ 14, -6 ≤ k ≤ 6, -26 ≤ l ≤ 26                                                                                |
| Reflections collected / unique    | 10400 / 2641 [R(int) = 0.0440]                                                                                        |
| Completeness to theta = 67.679    | 98.8 %                                                                                                                |
| Refinement method                 | Full-matrix least-squares on F <sup>2</sup>                                                                           |
| Data / restraints / parameters    | 2641 / 0 / 190                                                                                                        |
| Goodness-of-fit on F <sup>2</sup> | 1.017                                                                                                                 |
| Final R indices [I > 2sigma(I)]   | R1 = 0.0539, wR2 = 0.1436                                                                                             |
| R indices (all data)              | R1 = 0.0676, wR2 = 0.1590                                                                                             |
| Extinction coefficient            | n/a                                                                                                                   |
| Largest diff. peak and hole       | 0.423 and -0.330 e.Å <sup>-3</sup>                                                                                    |

## 7. $^1\text{H}$ -NMR and $^{19}\text{F}$ -NMR spectroscopy studies

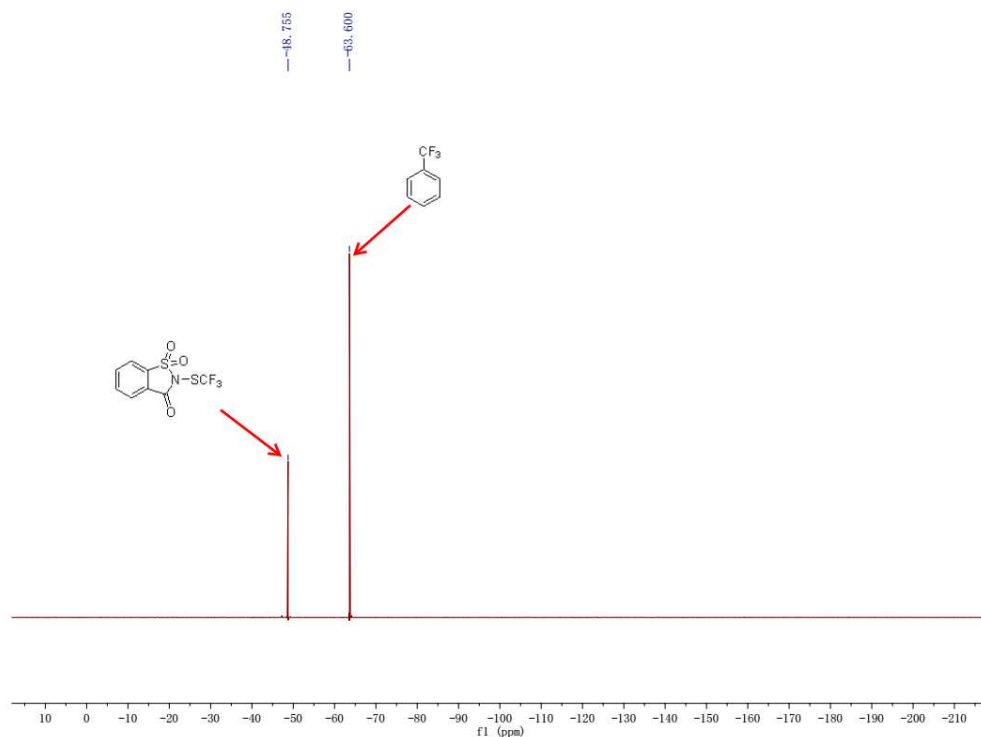

$^{19}\text{F}$  NMR of **2a** and  $\text{PhCF}_3$  in  $\text{CD}_3\text{CN}$  (376 MHz NMR)

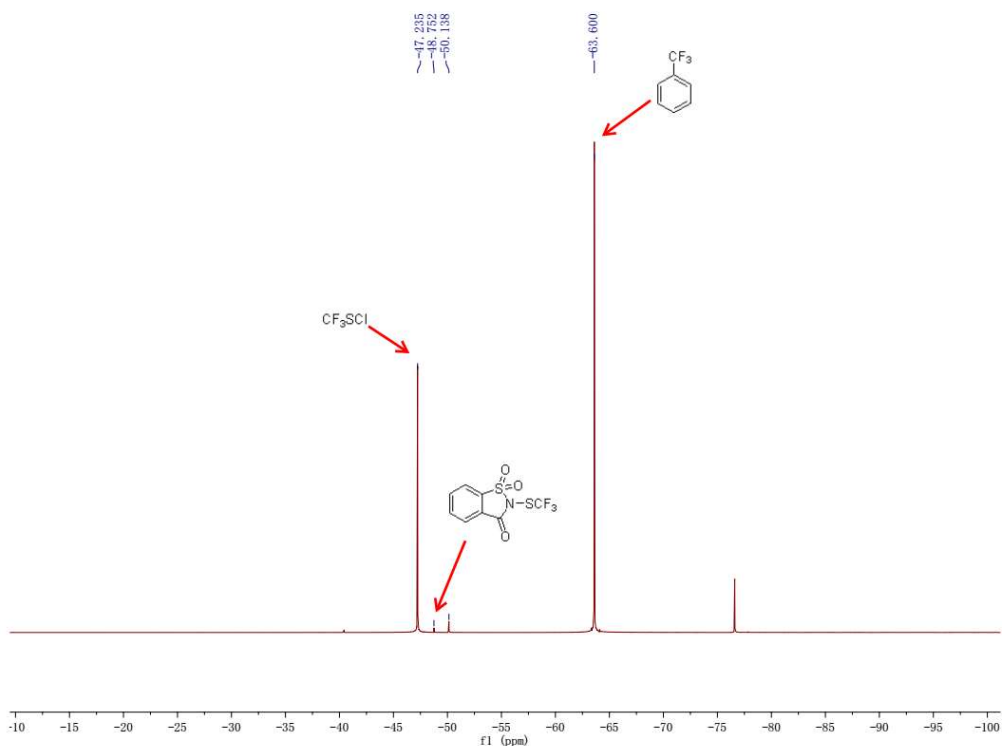

$^{19}\text{F}$  NMR of **2a**,  $\text{TMSCl}$  and  $\text{PhCF}_3$  in  $\text{CD}_3\text{CN}$  (376 MHz NMR)

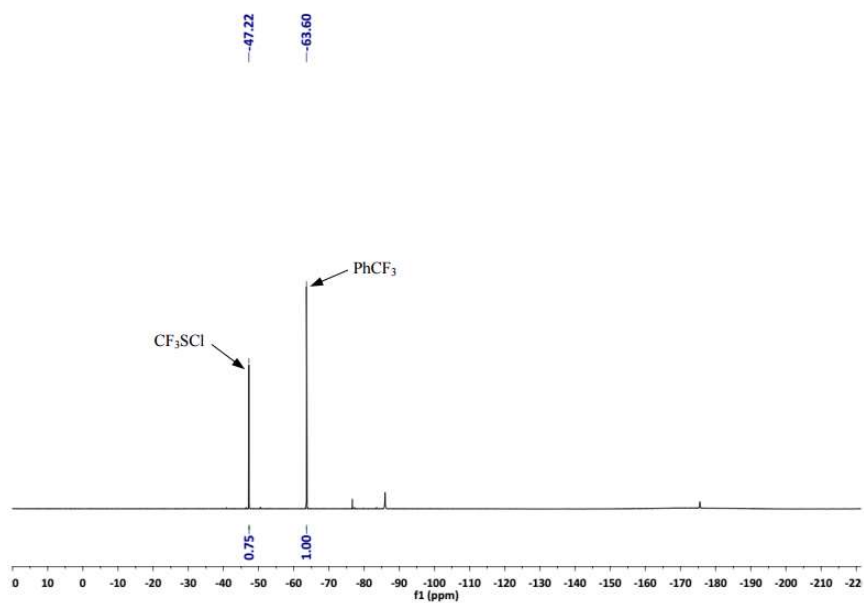

<sup>19</sup>F NMR of CF<sub>3</sub>SCl and PhCF<sub>3</sub> in reference (*Org. Chem. Front.*, **2017**, 4, 266)

According to previous work<sup>7</sup>, we can find that CF<sub>3</sub>SCl was firstly formed in the present of Shen's reagent **2a** and TMSCl.

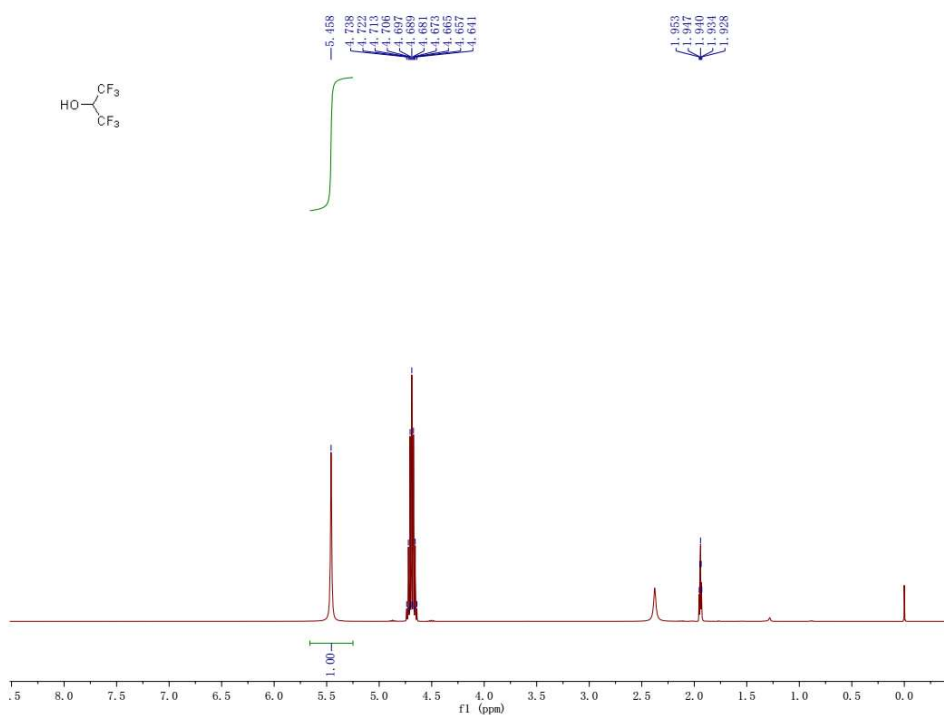

<sup>1</sup>H NMR of HFIP in CD<sub>3</sub>CN (400 MHz NMR)



Chen, L.-Y.; Chen, P.-Y.; Hsu, S. C.-N.; Lin, Ch.-N.; Wang, E.-C. *ARKIVOC* **2008**, 12, 205-217.

5. For the synthesis and analytical data of substrates **5m**: Lebrasseur, N.; Gagnepain, J.; Ozanne-Beaudenon, A.; Léger, J.-M.; Quideau, S. *J. Org. Chem* **2007**, 72, 6280–6283.

6. For the synthesis and analytical data of substrates **5n** and **5o**: Chen, L.-Y.; Chen, J.-R.; Cheng, H.-G.; Lu, L.-Q.; Xiao, W.-J. *Eur. J. Org. Chem* **2014**, 22, 4714-4719.

7. Bu, M.-J.; Lu, G.-P.; Cai, C. *Org. Chem. Front.* **2017**, 4, 266-270.

8. Yang, X.-G.; Zheng, K.; Zhang, C. *Org. Lett.* **2020**, 22, 2026.





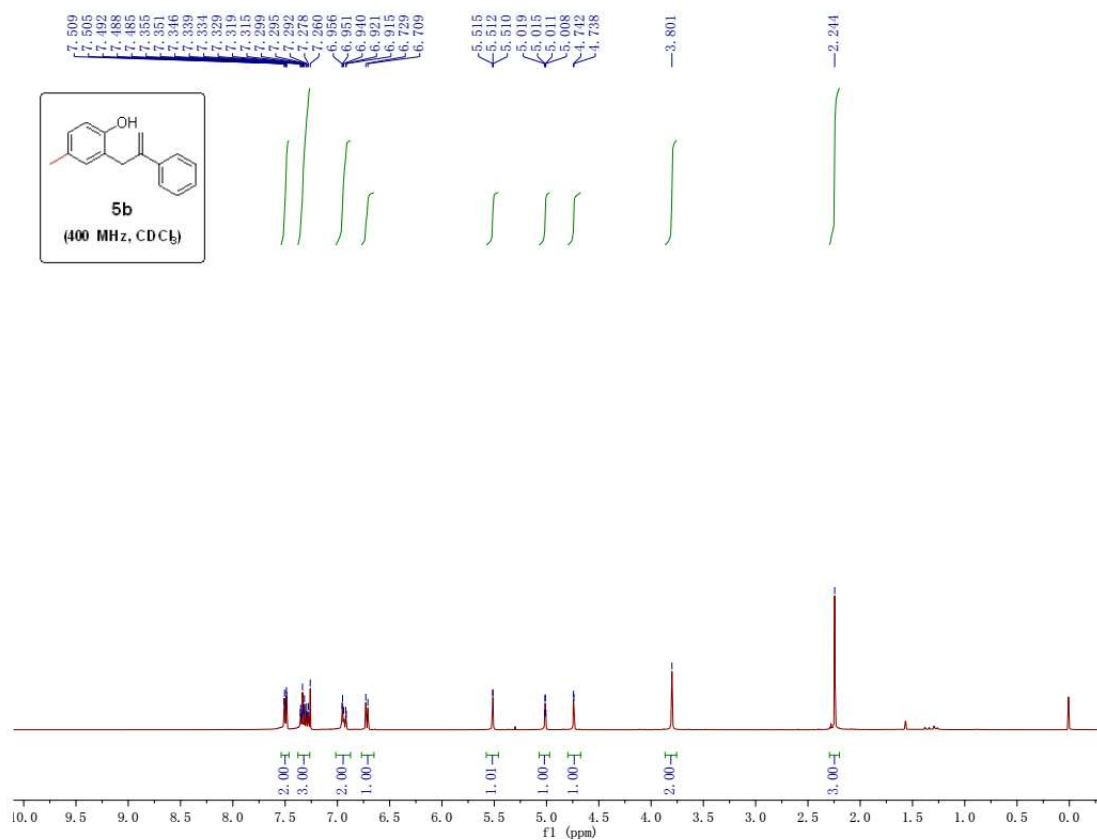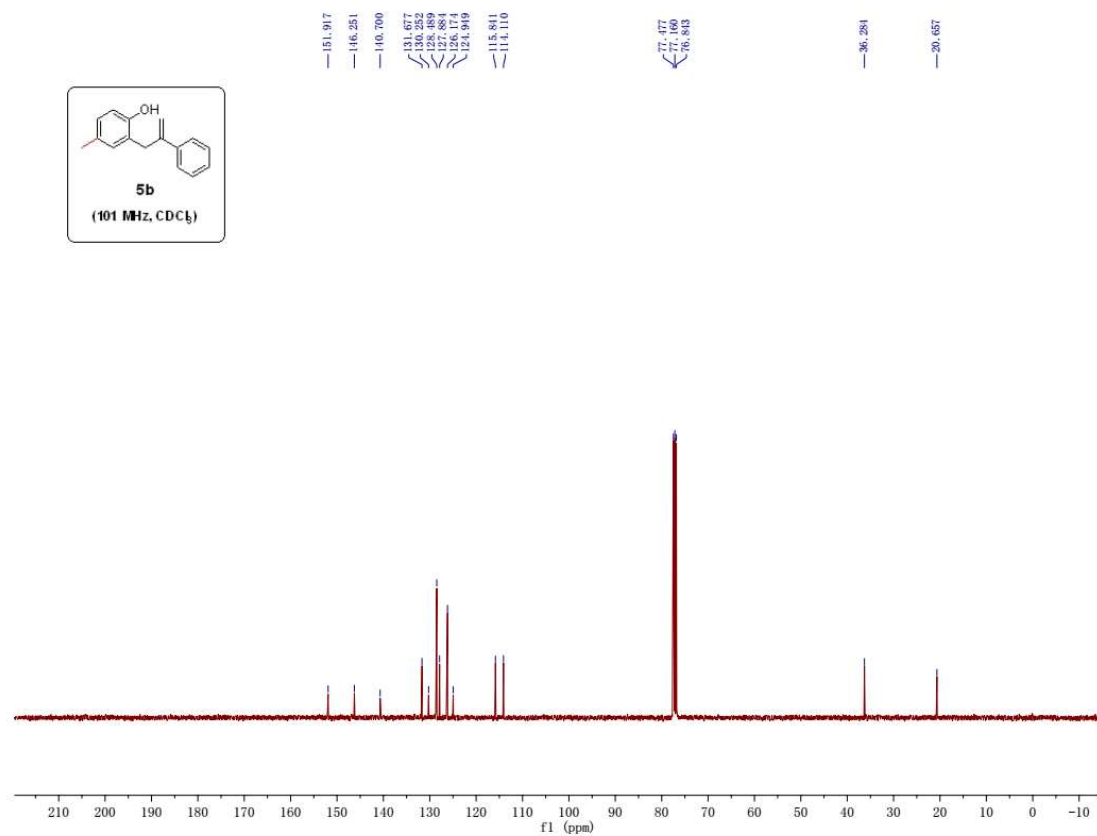



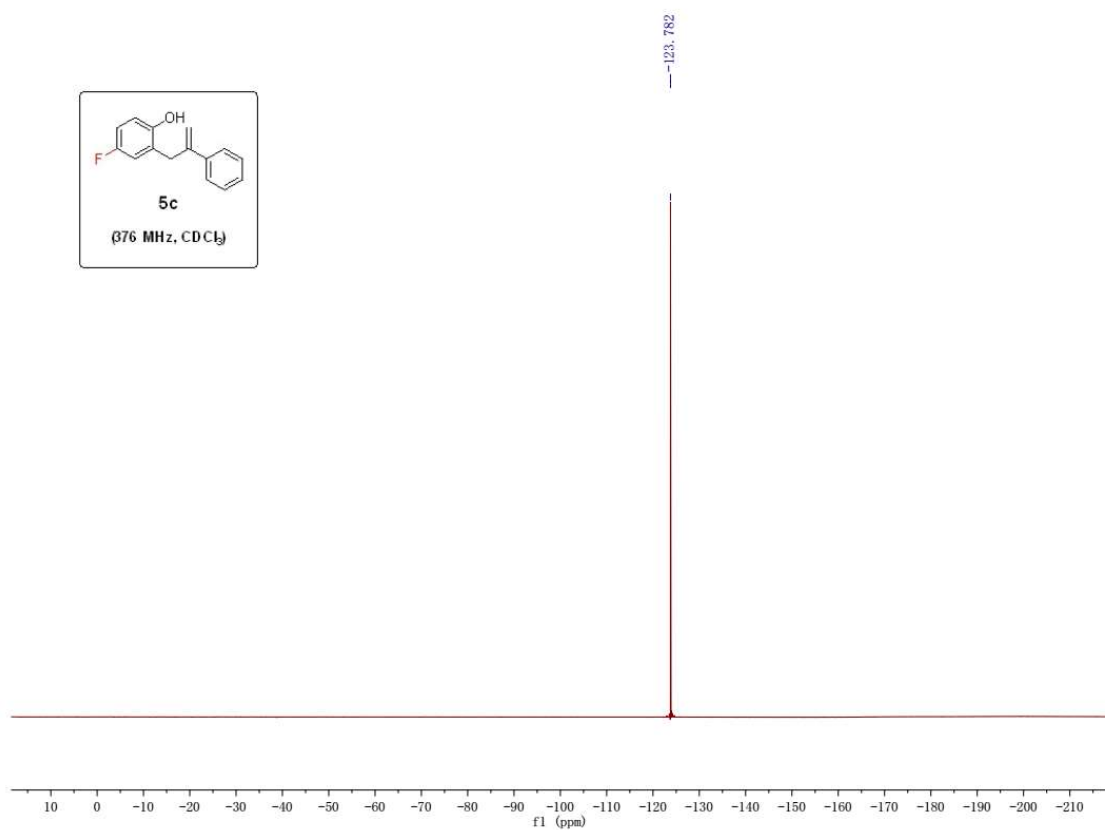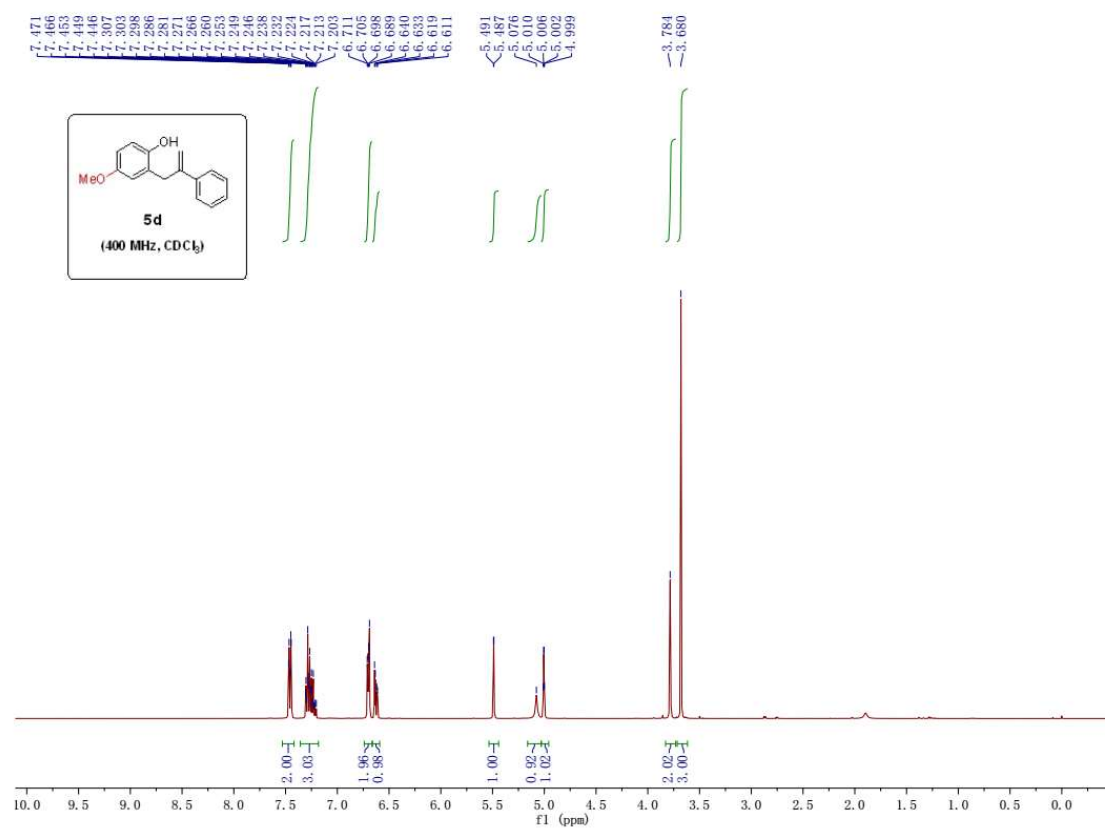

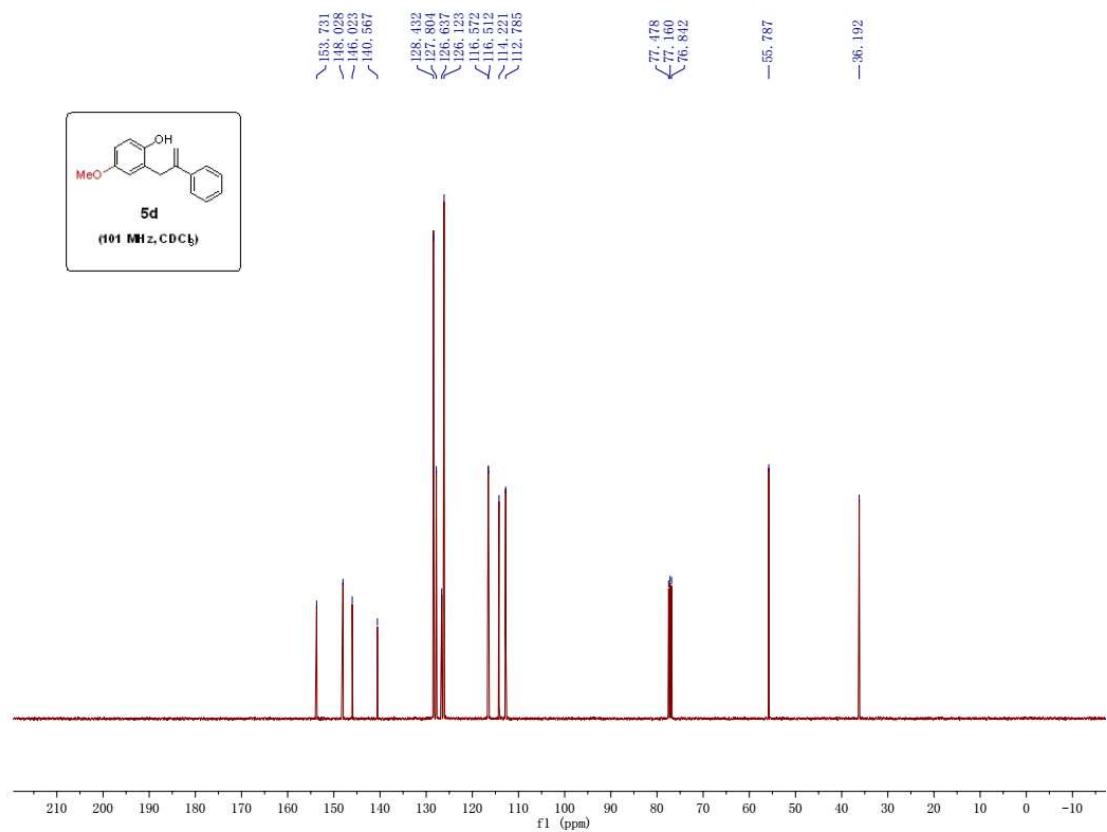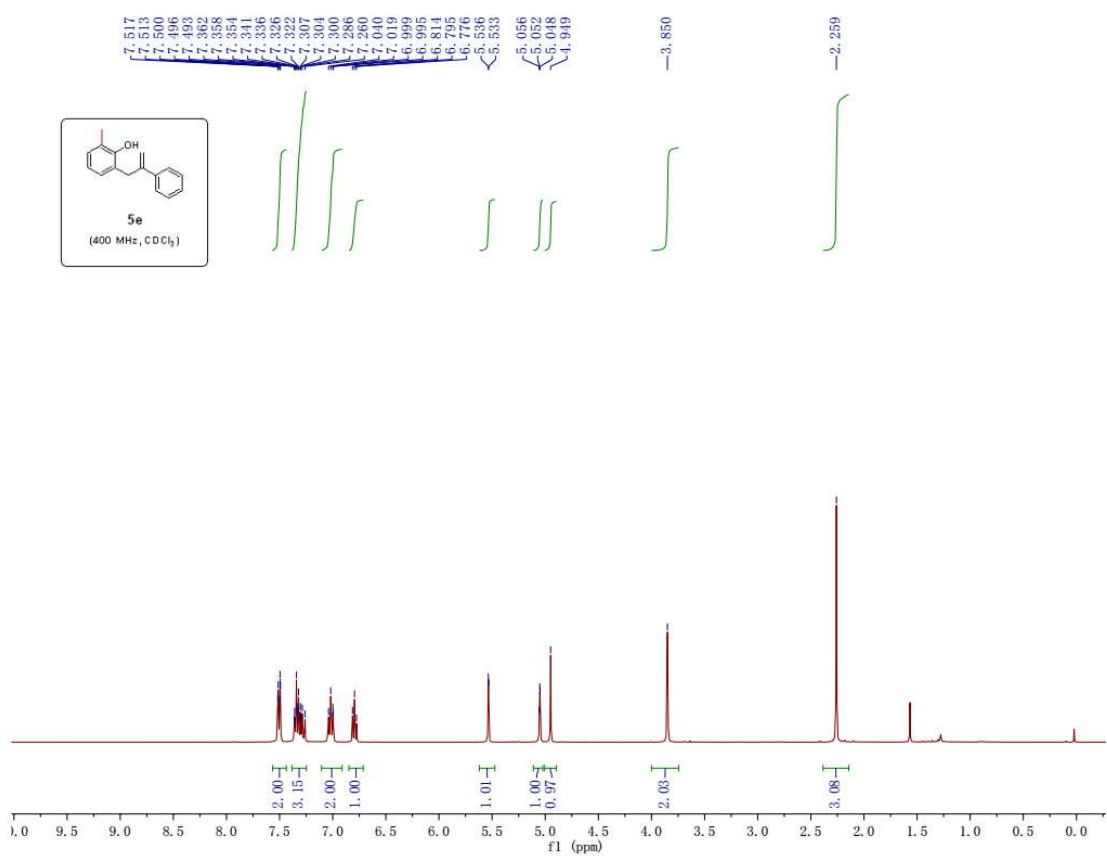

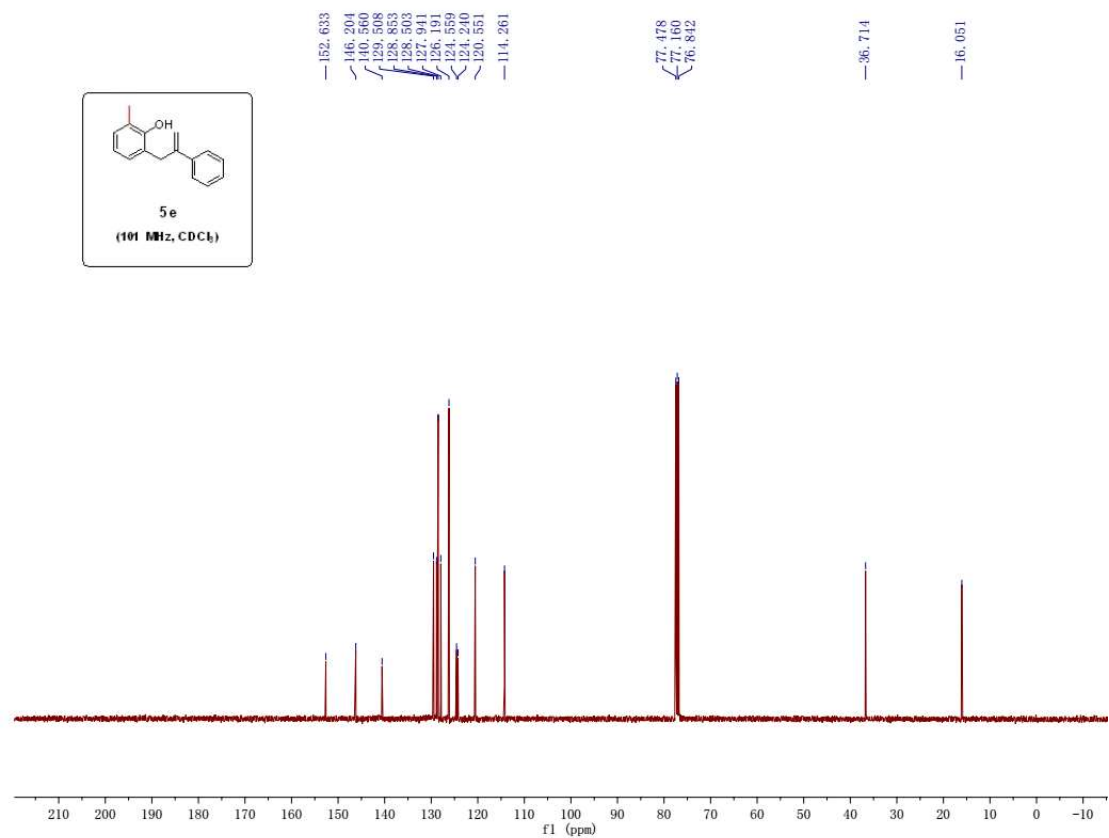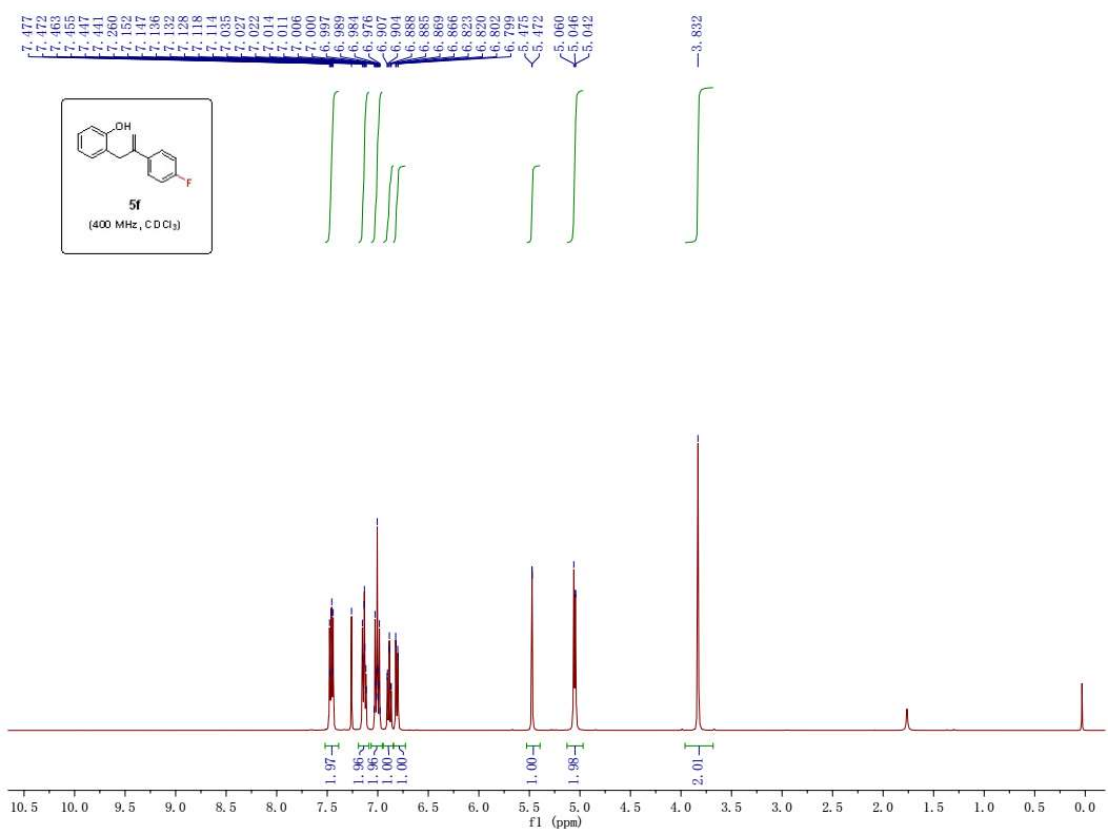

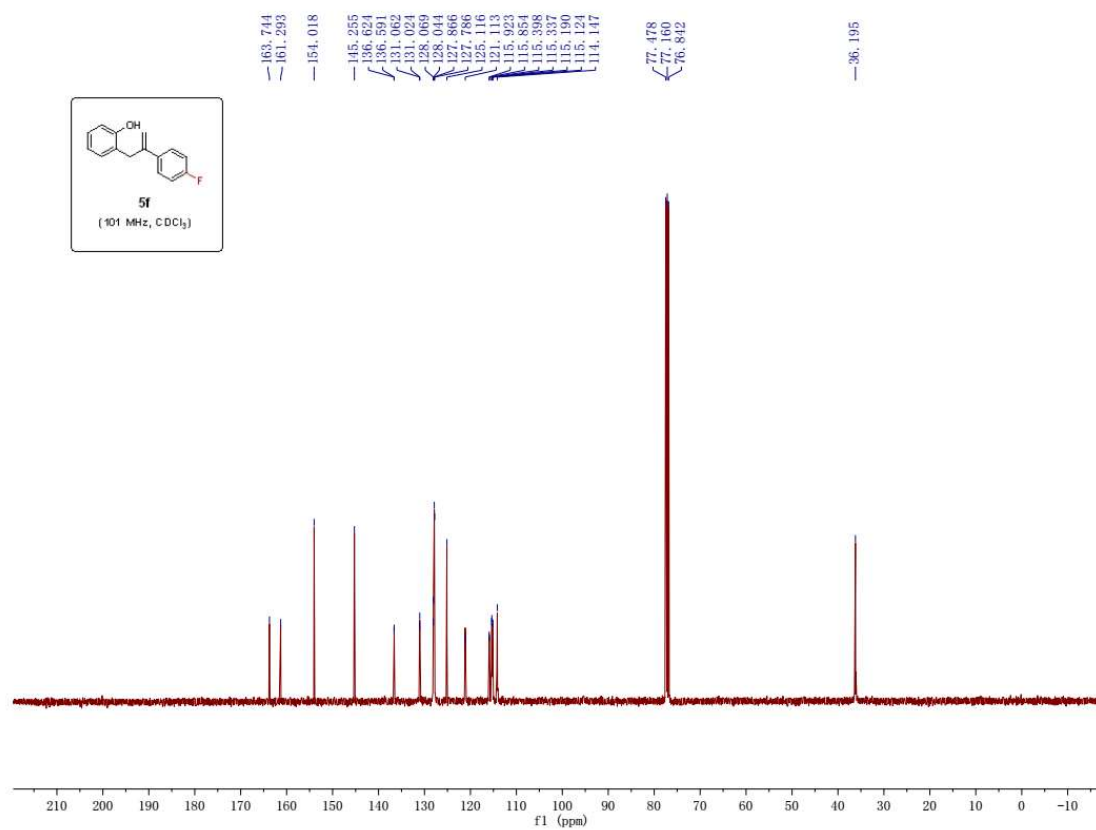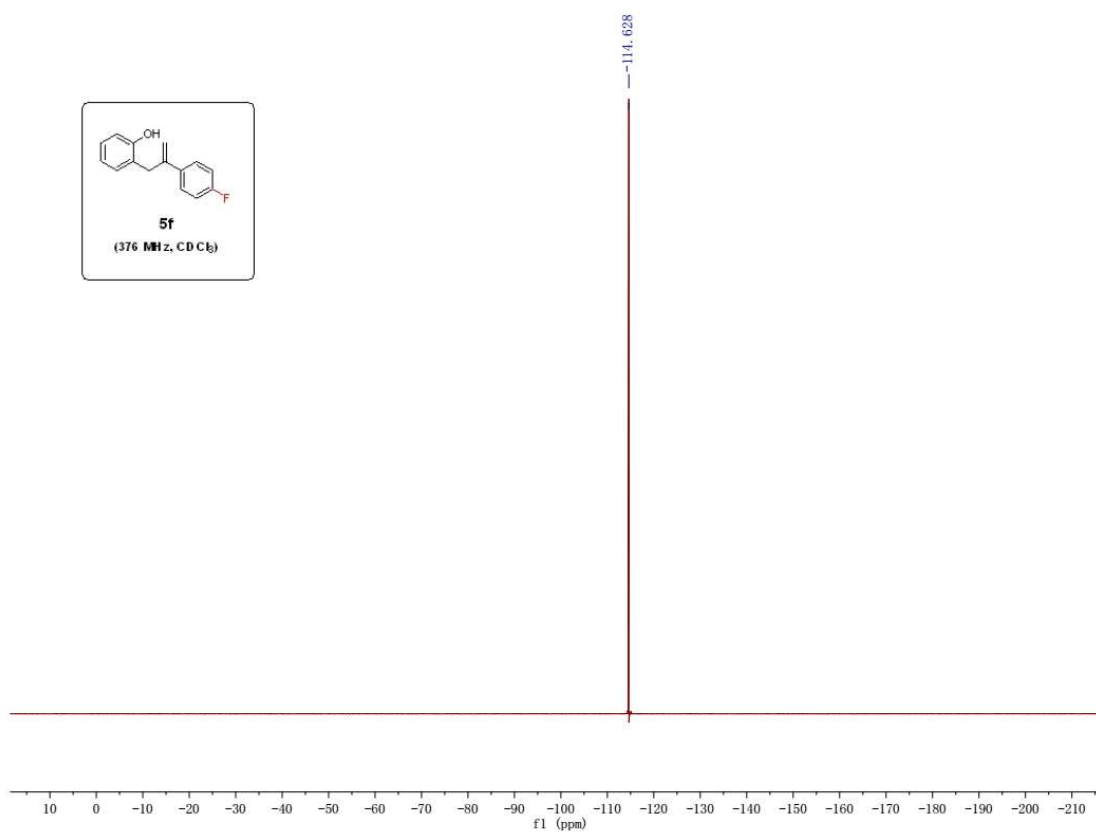

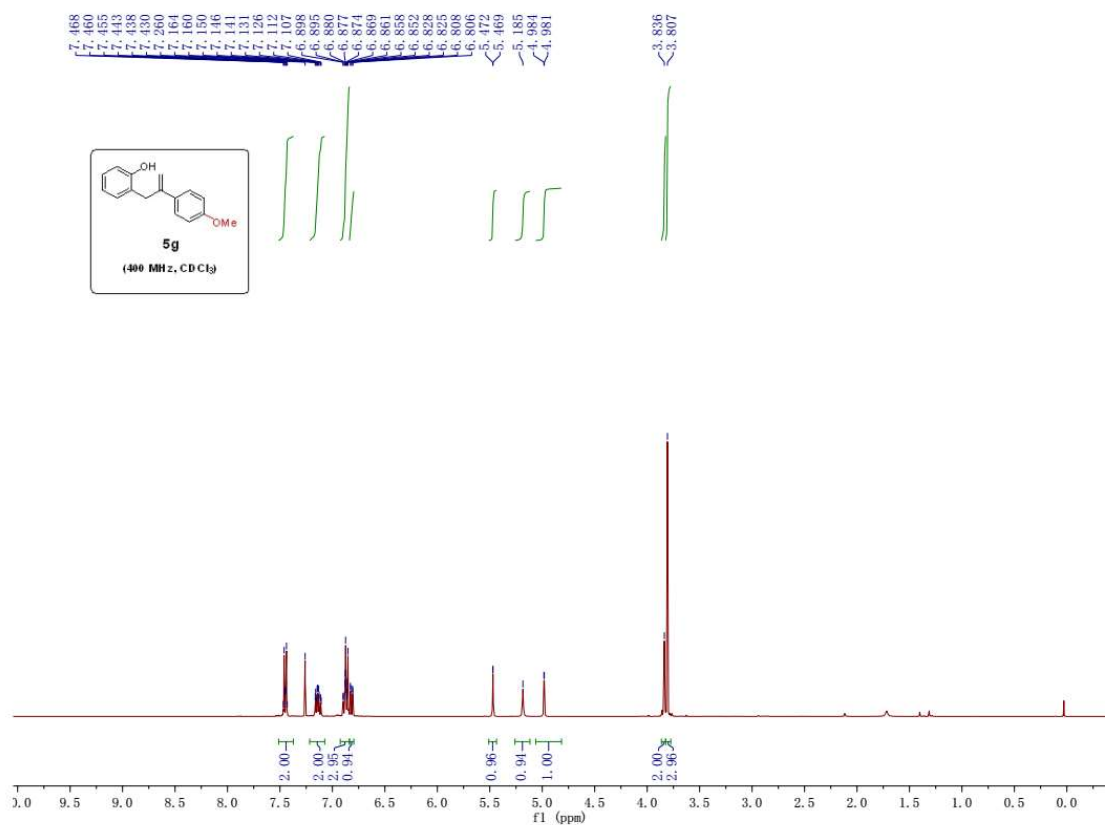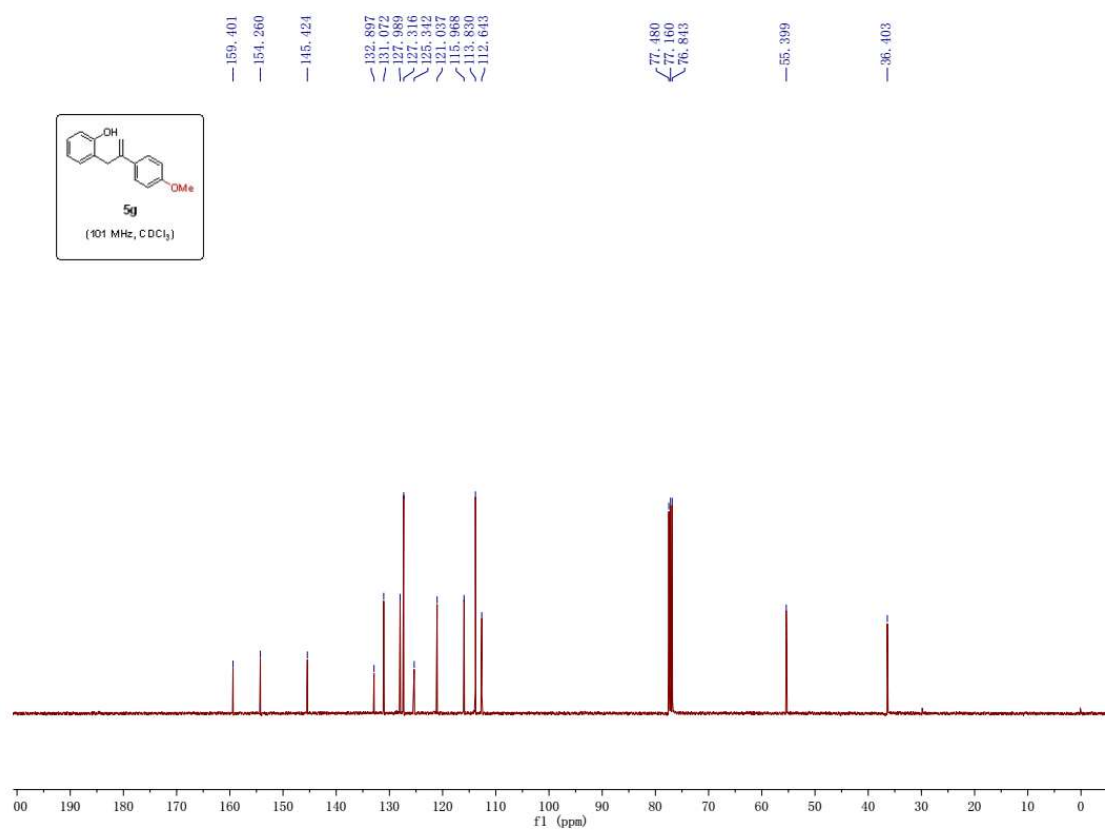

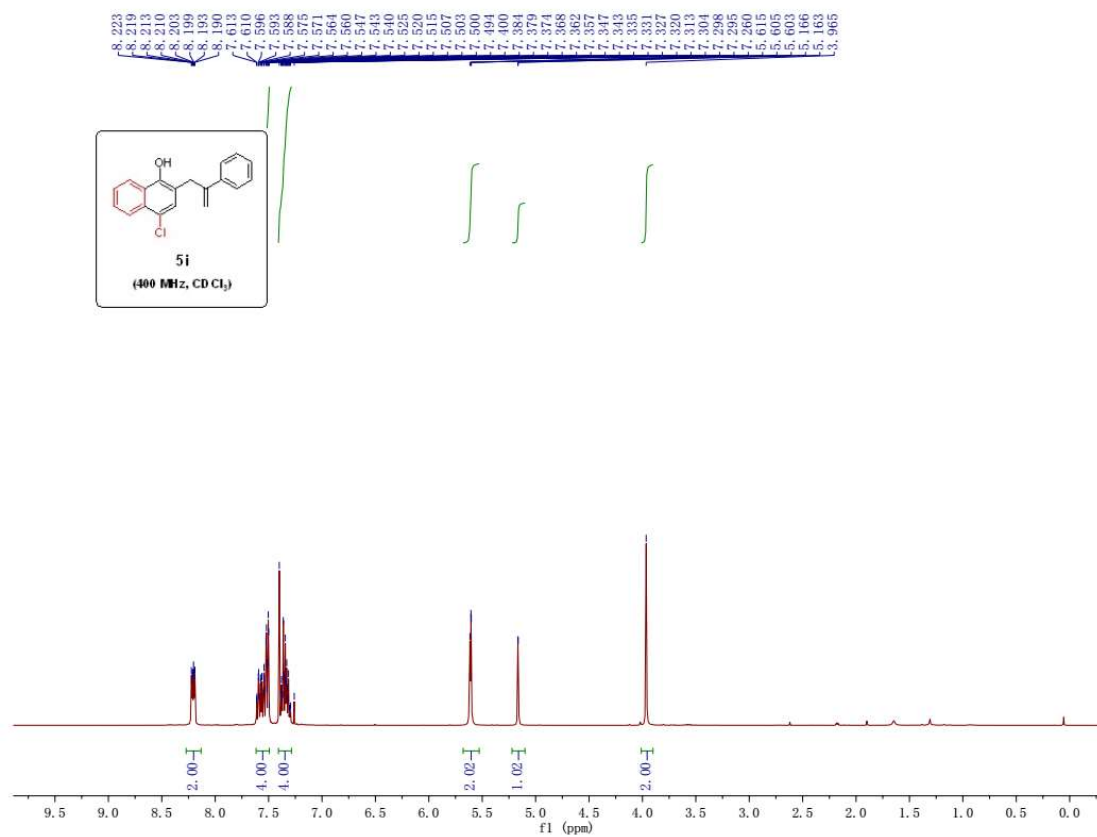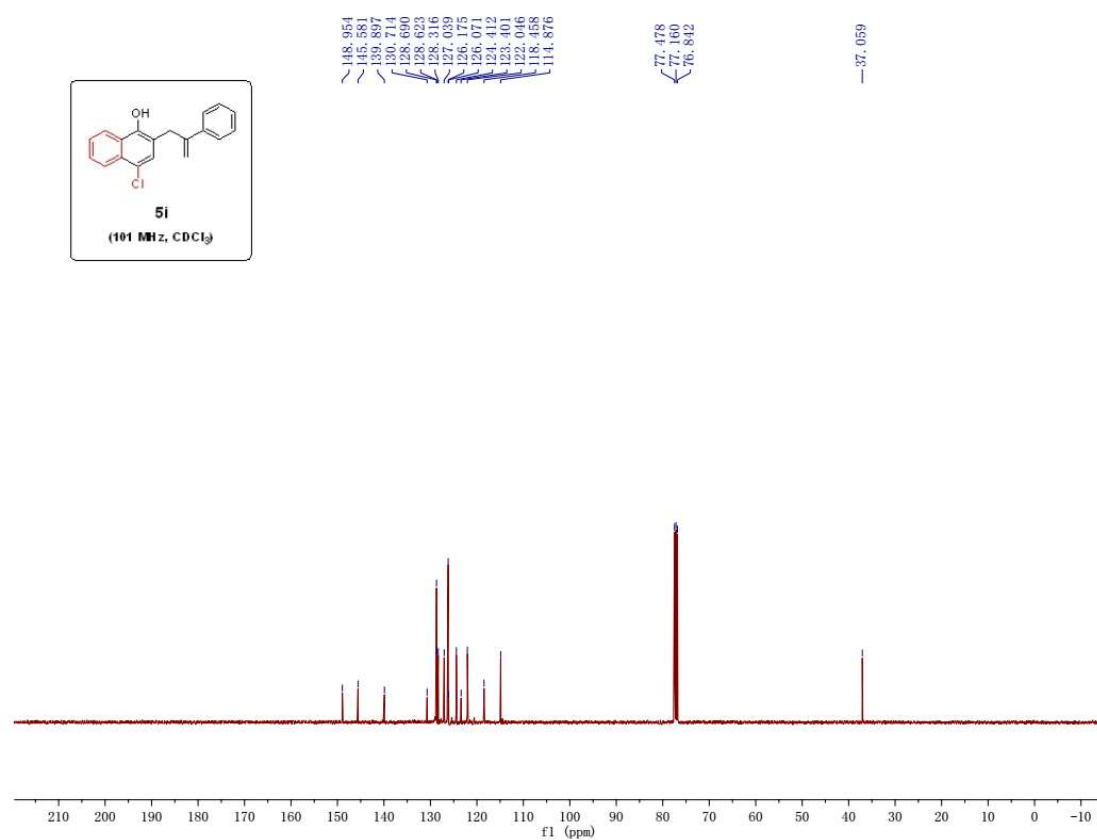



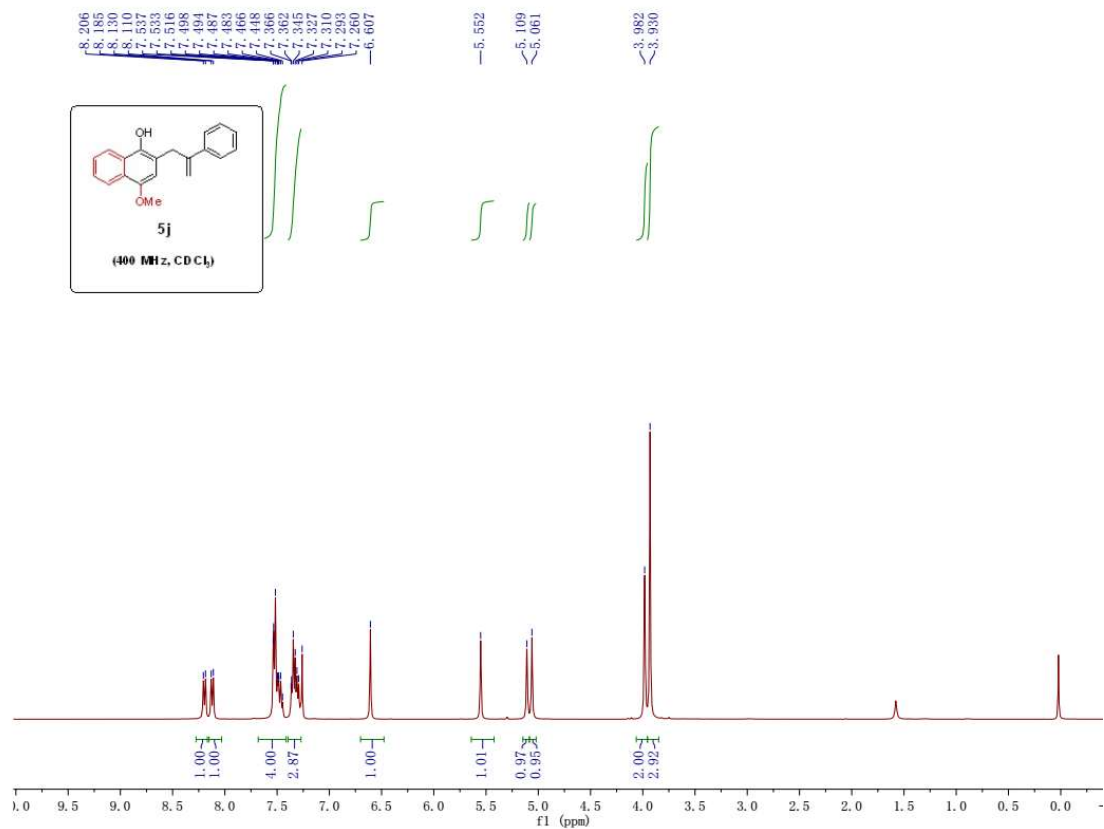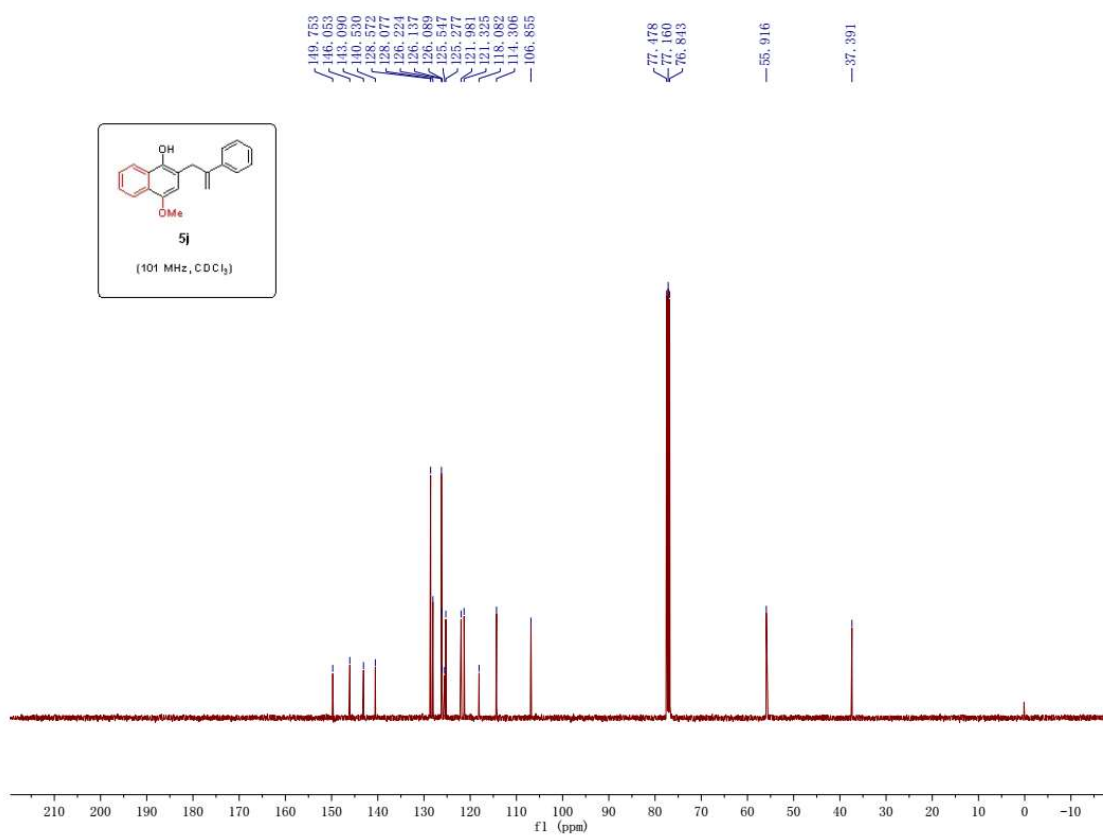

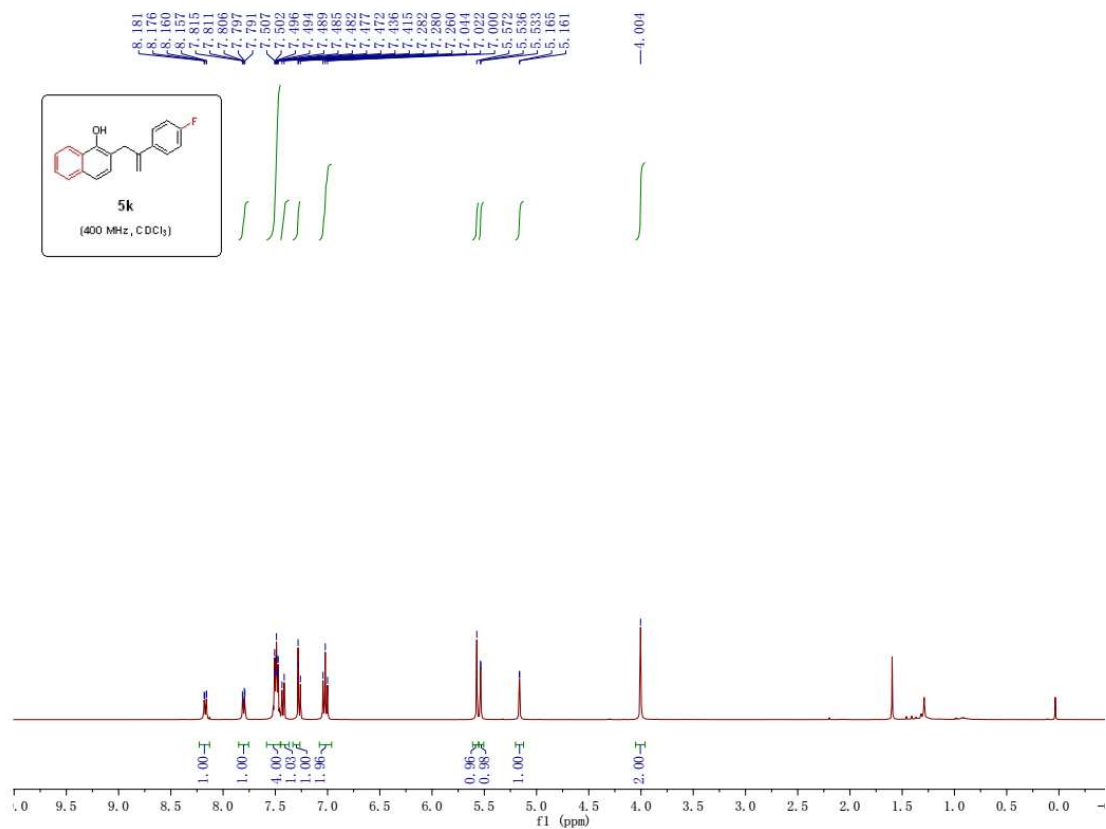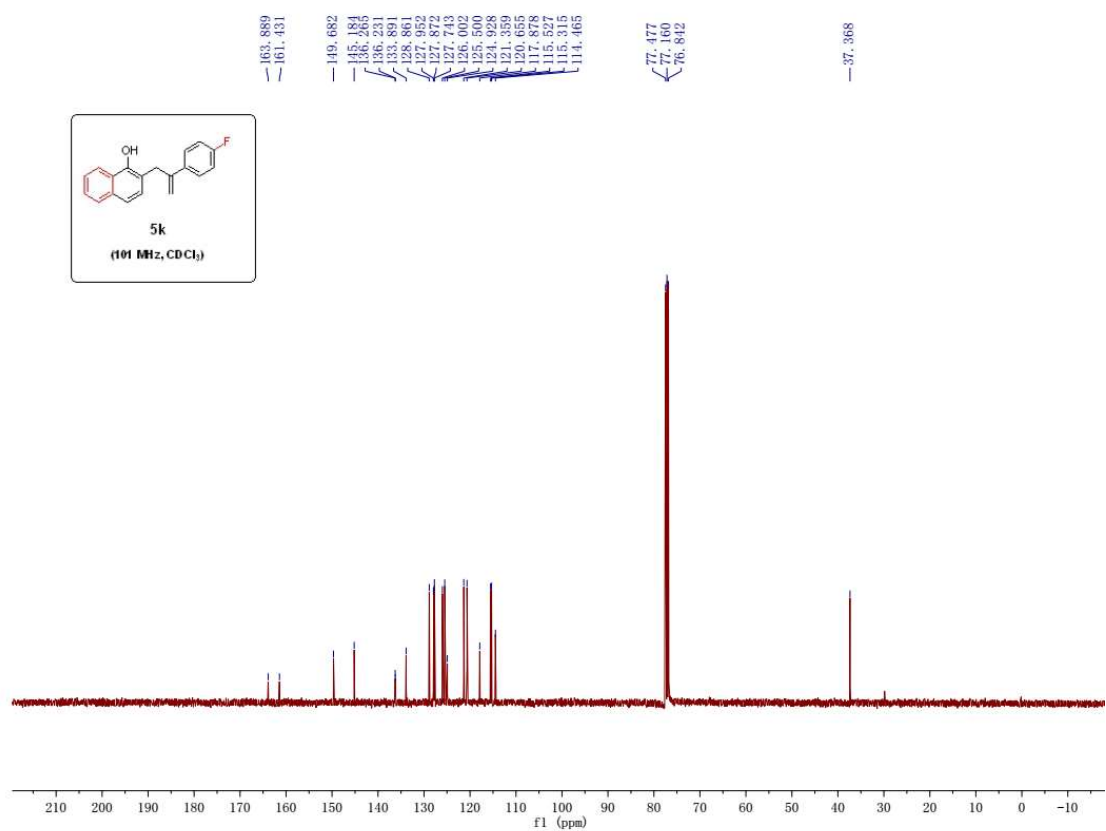

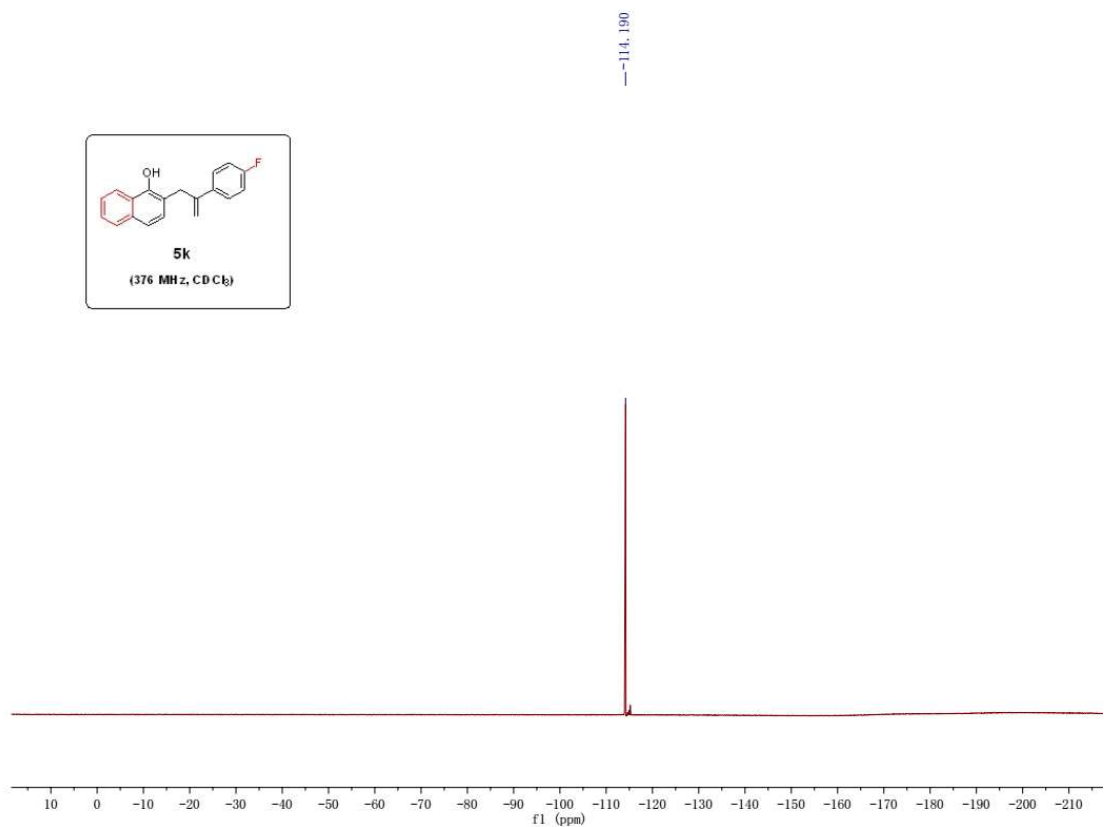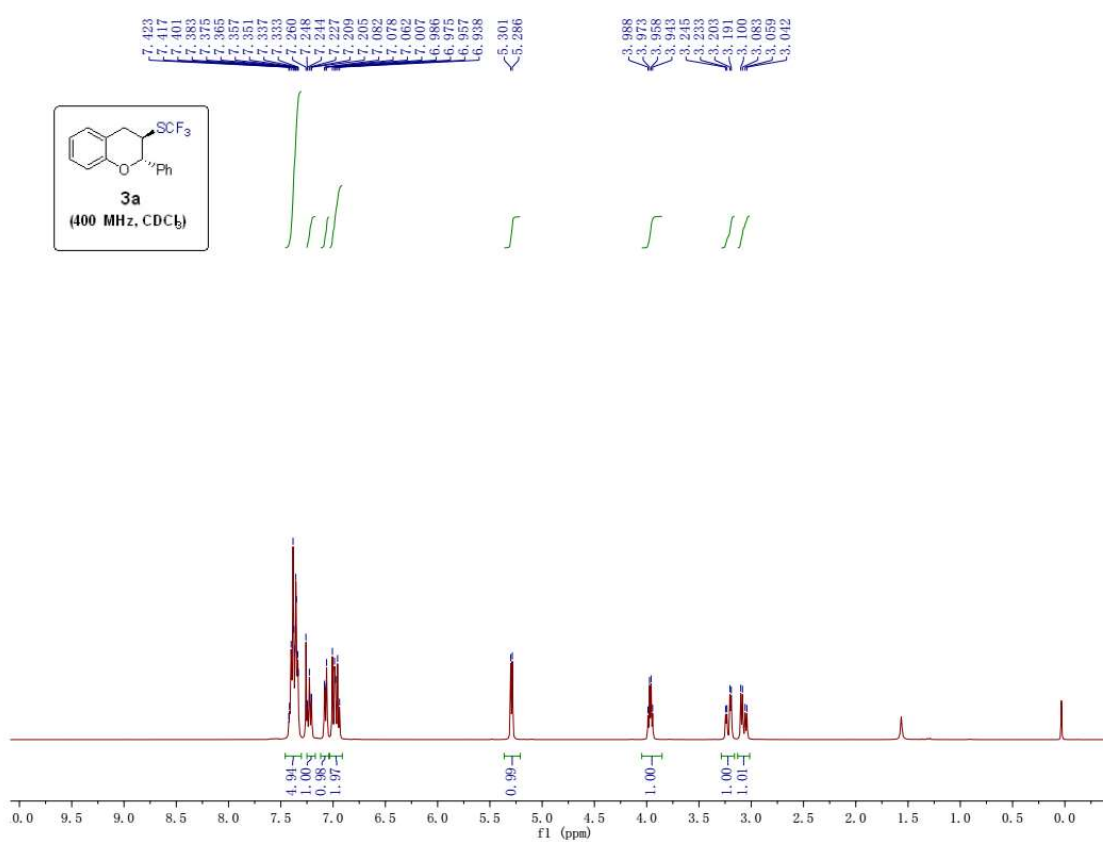

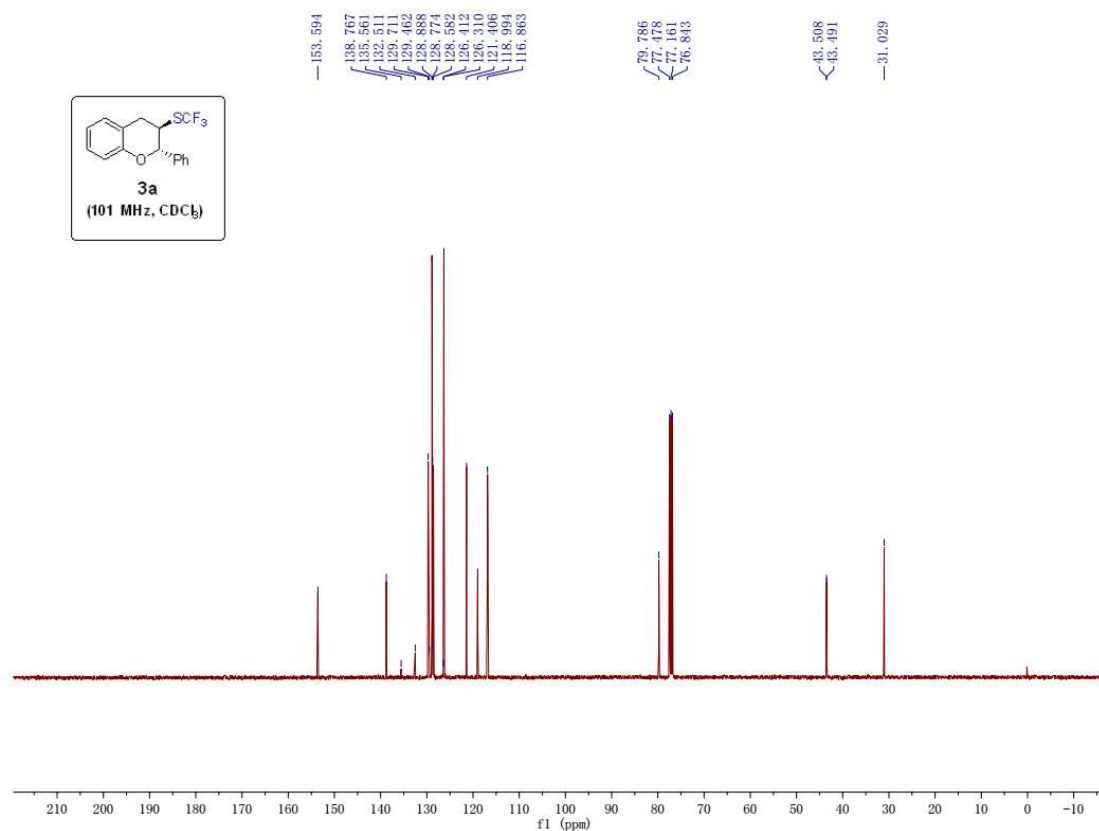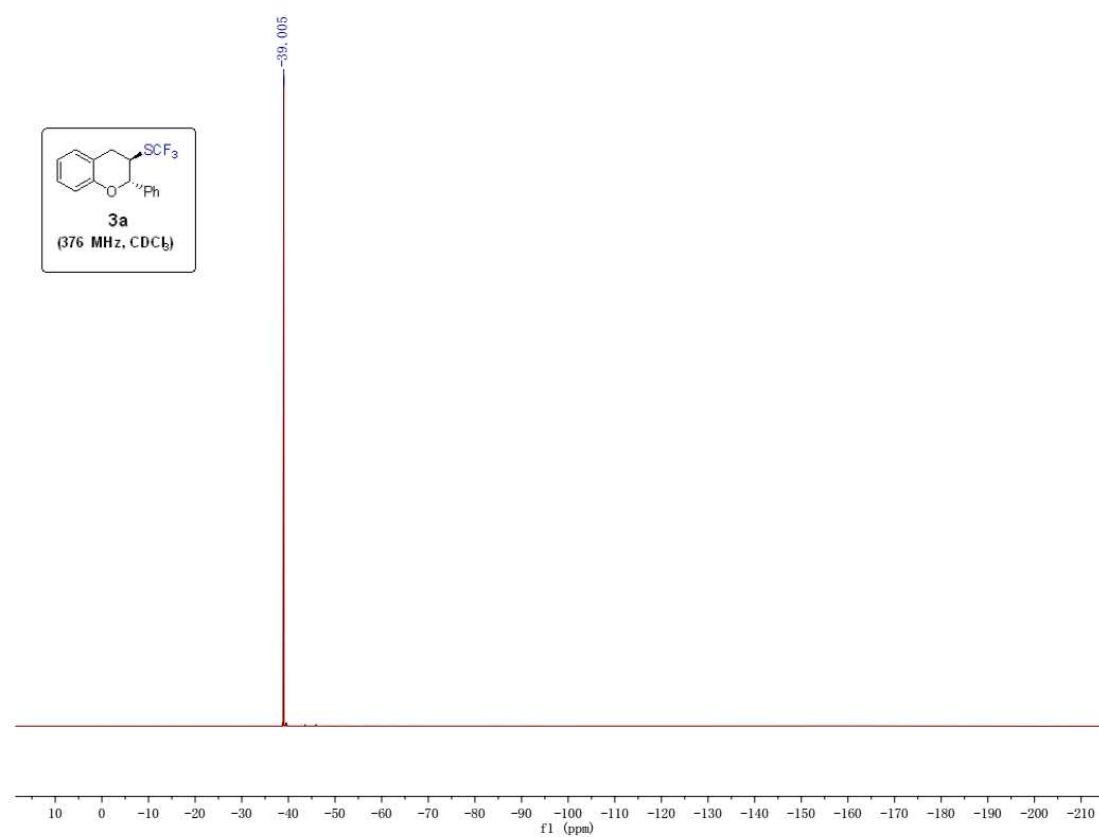

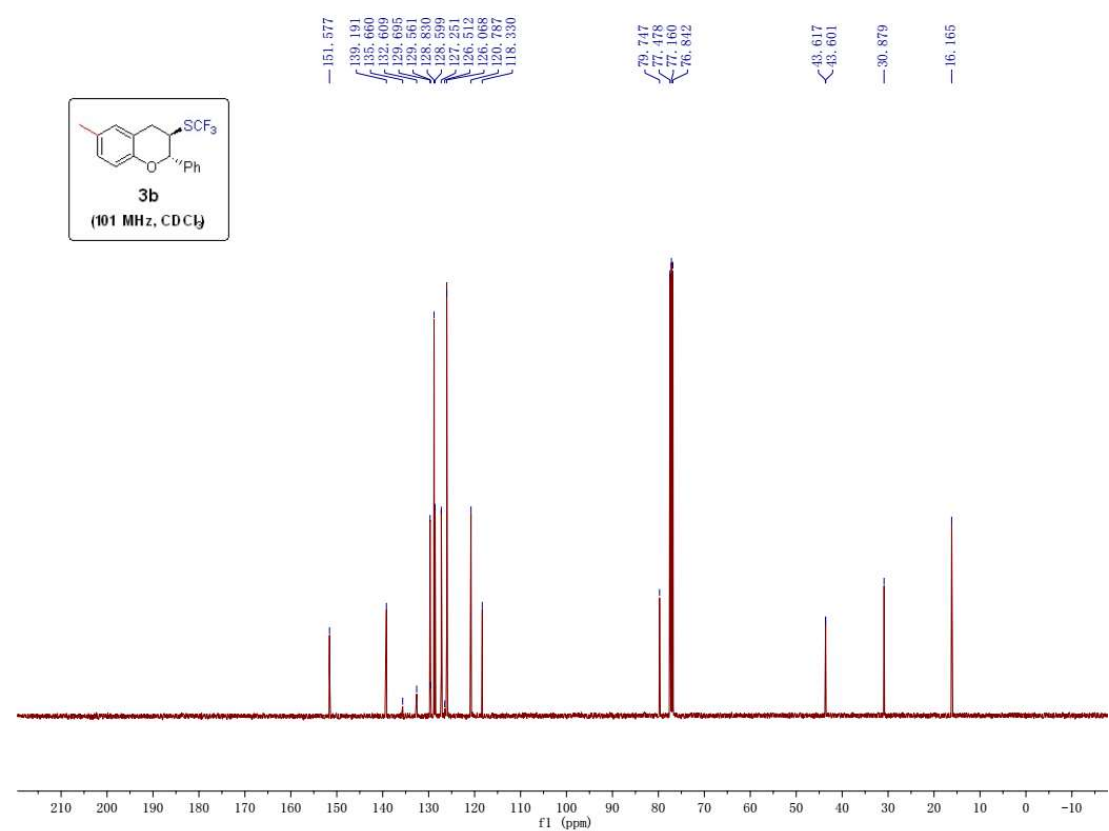

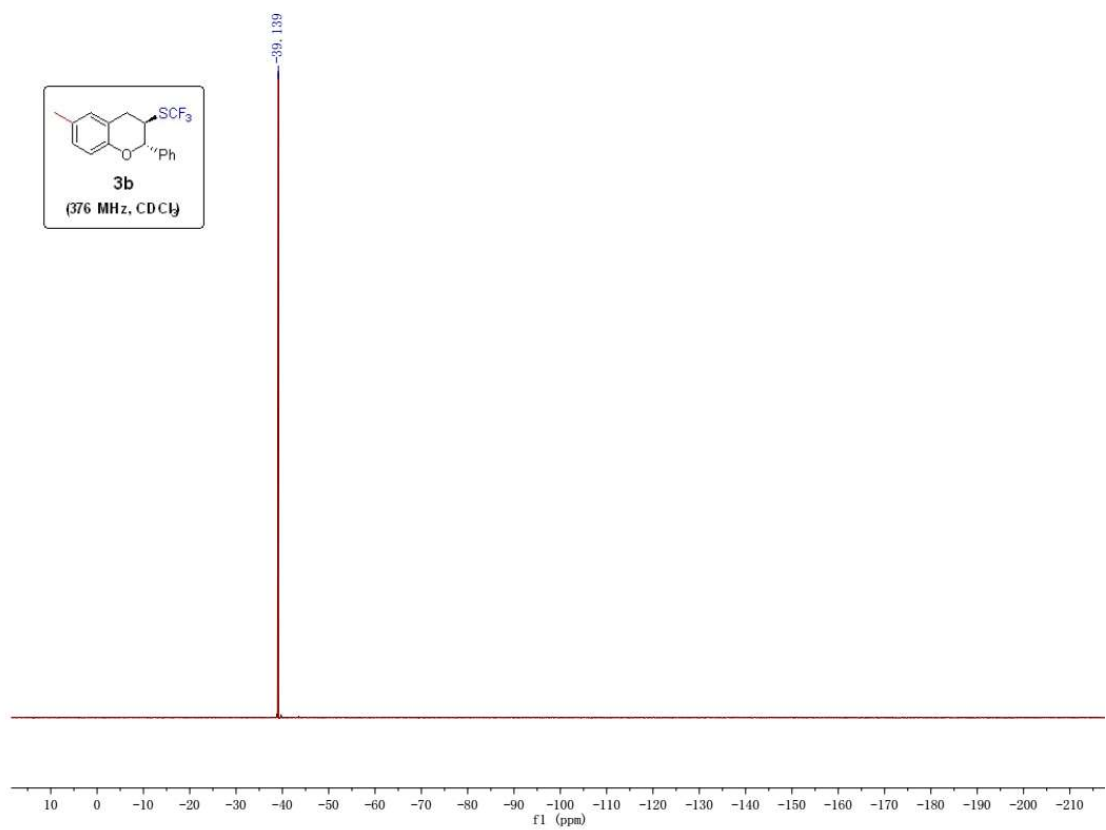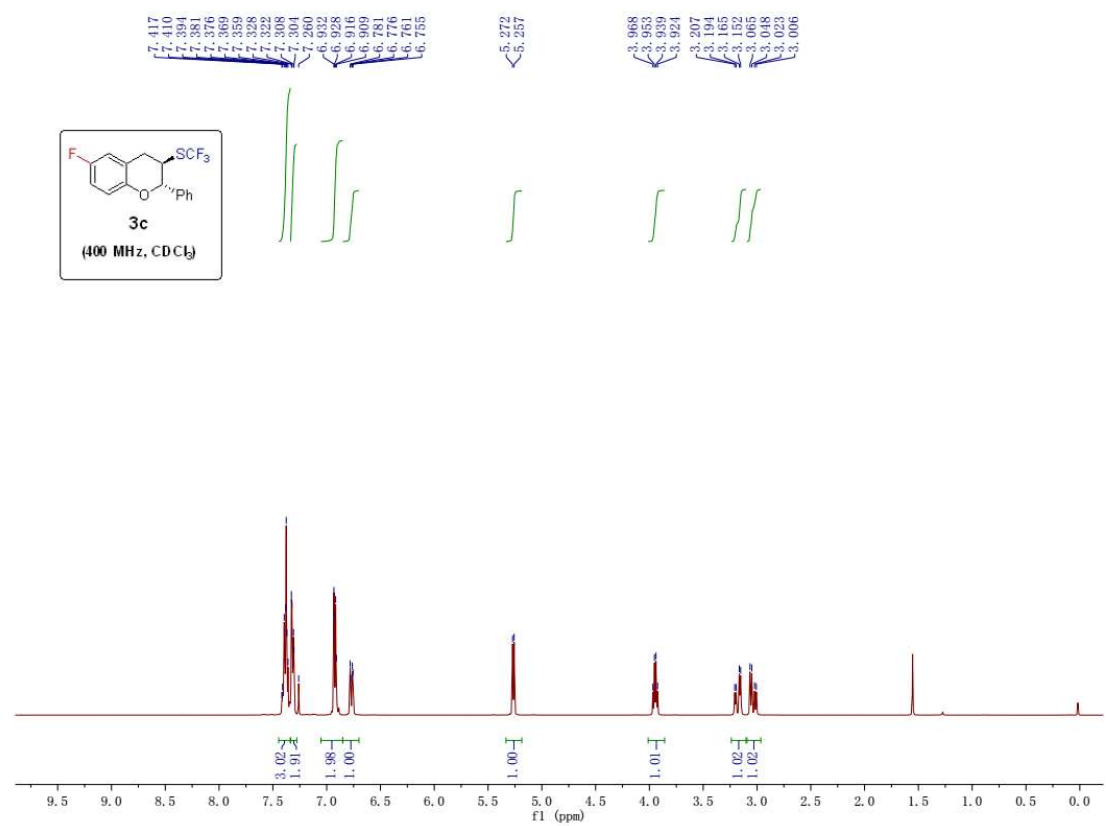

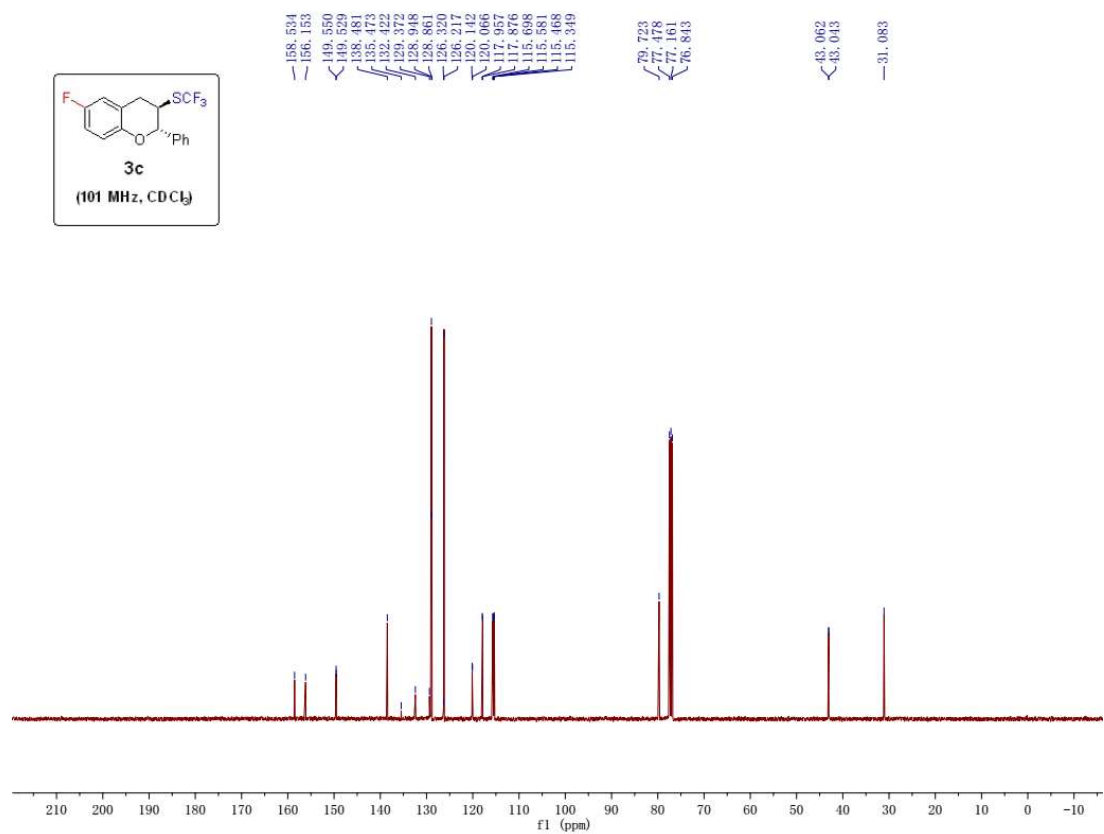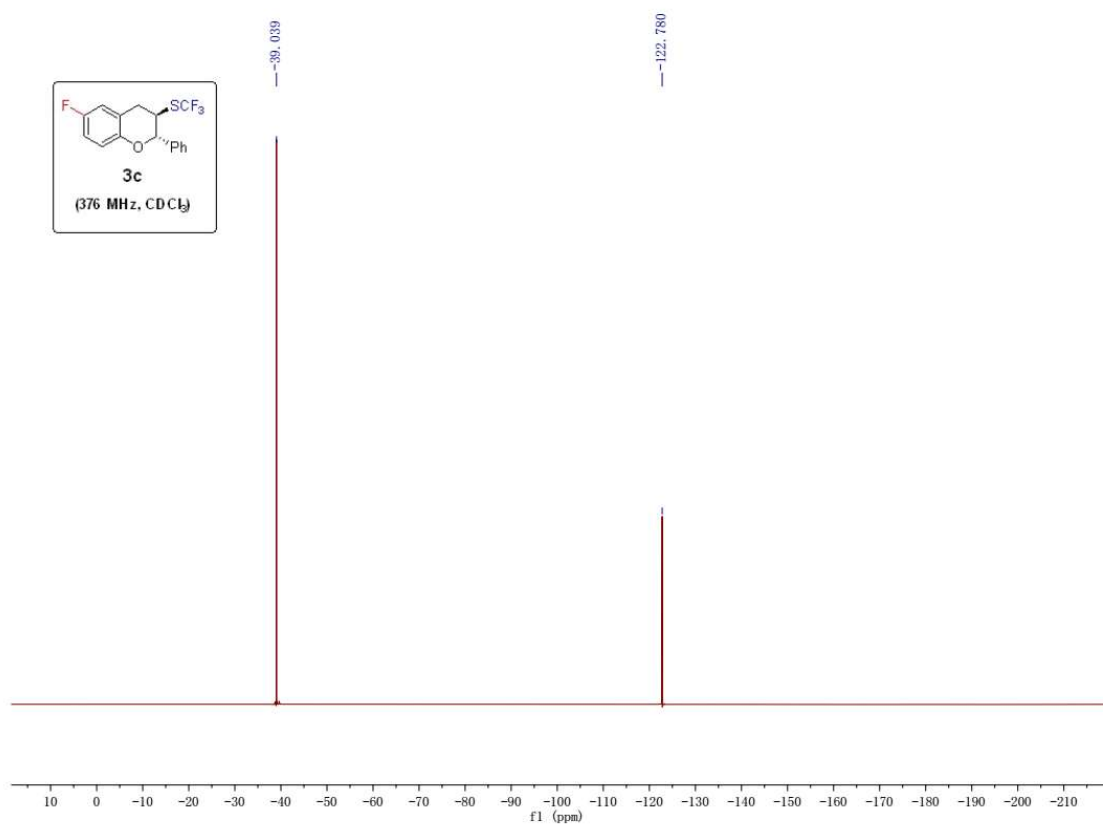

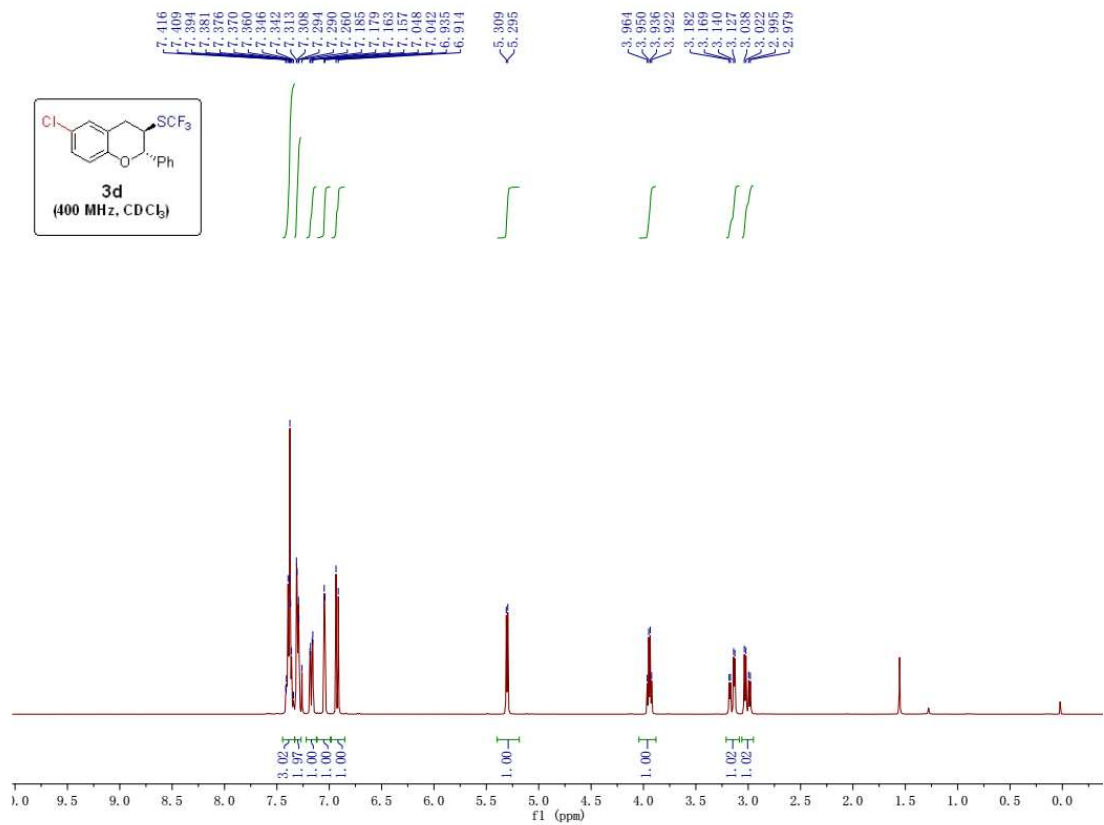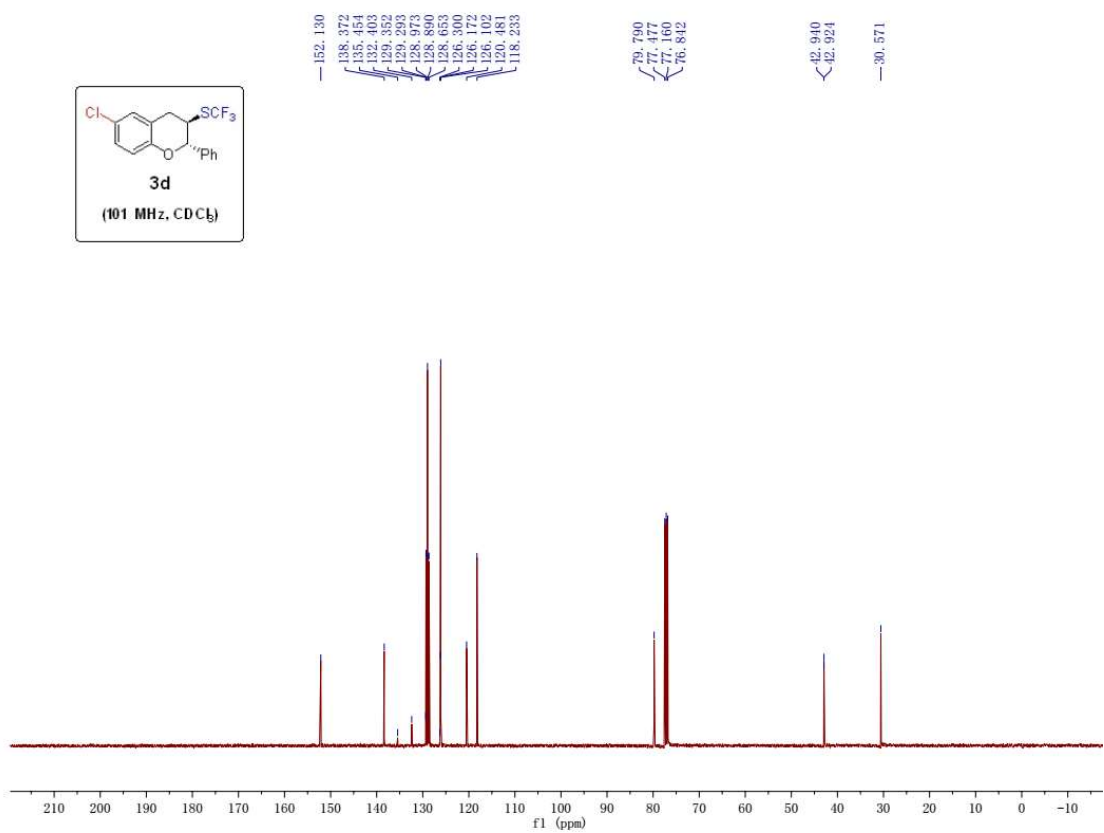



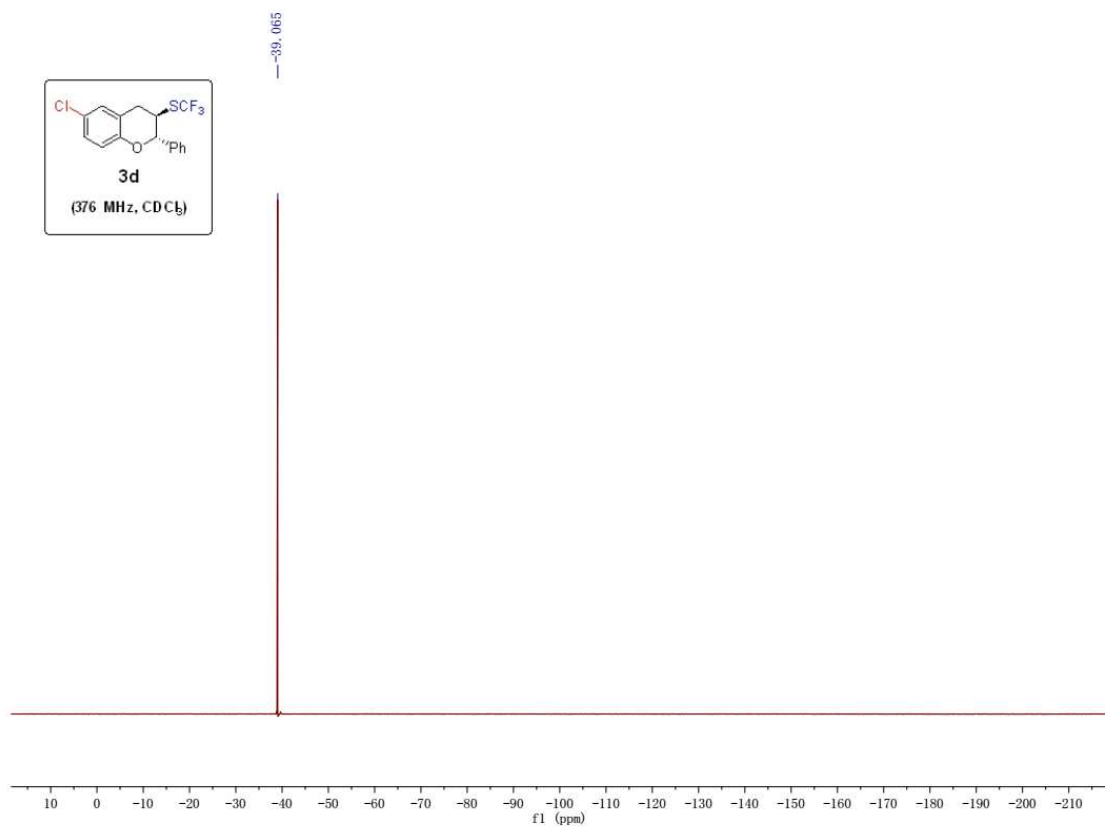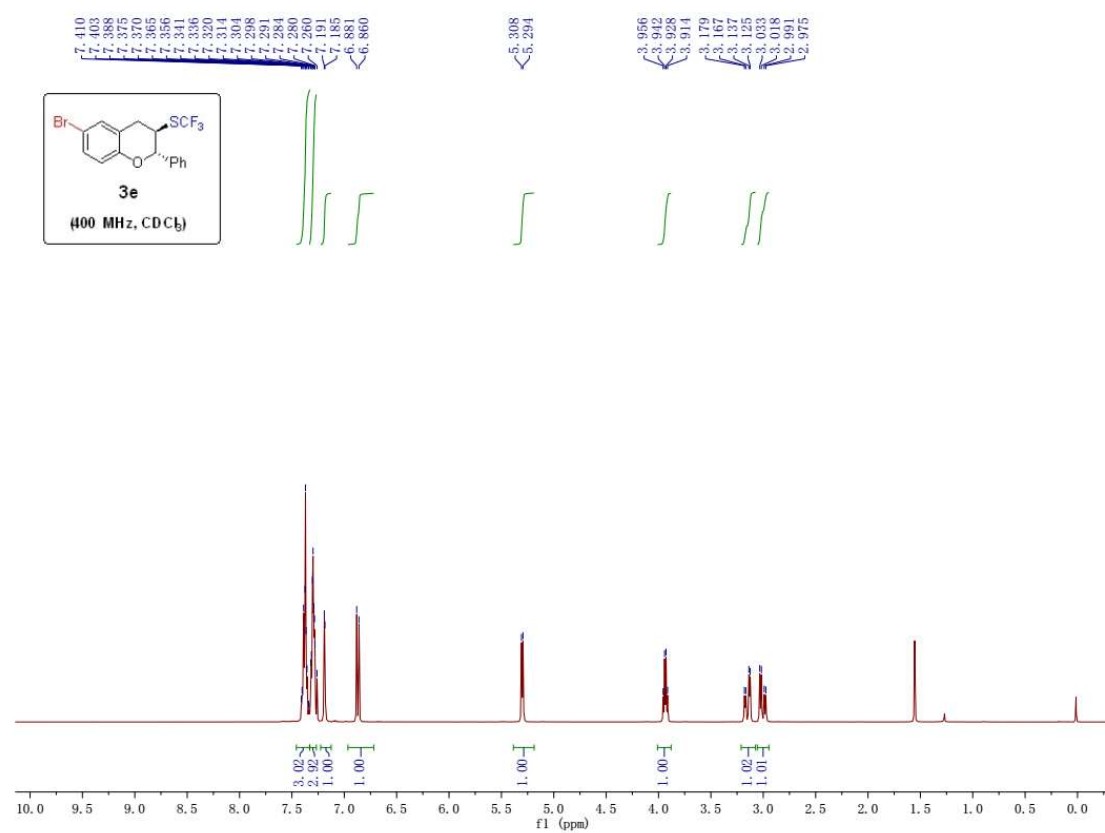

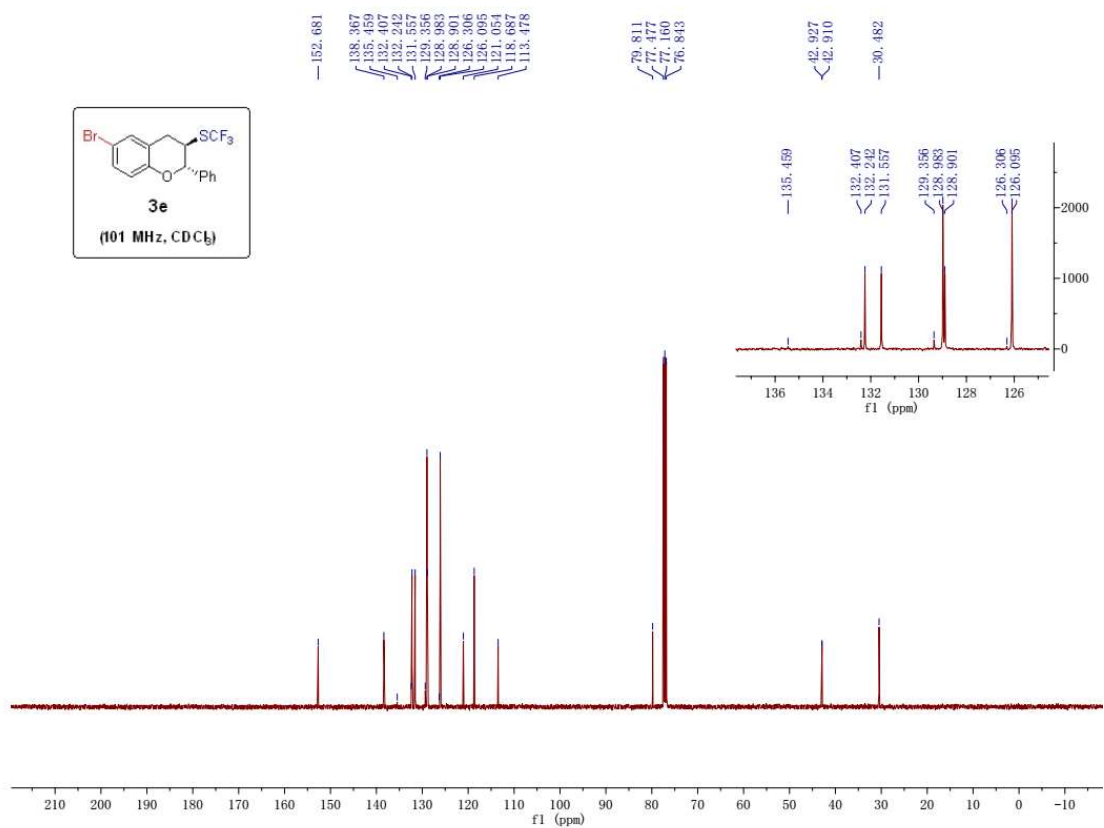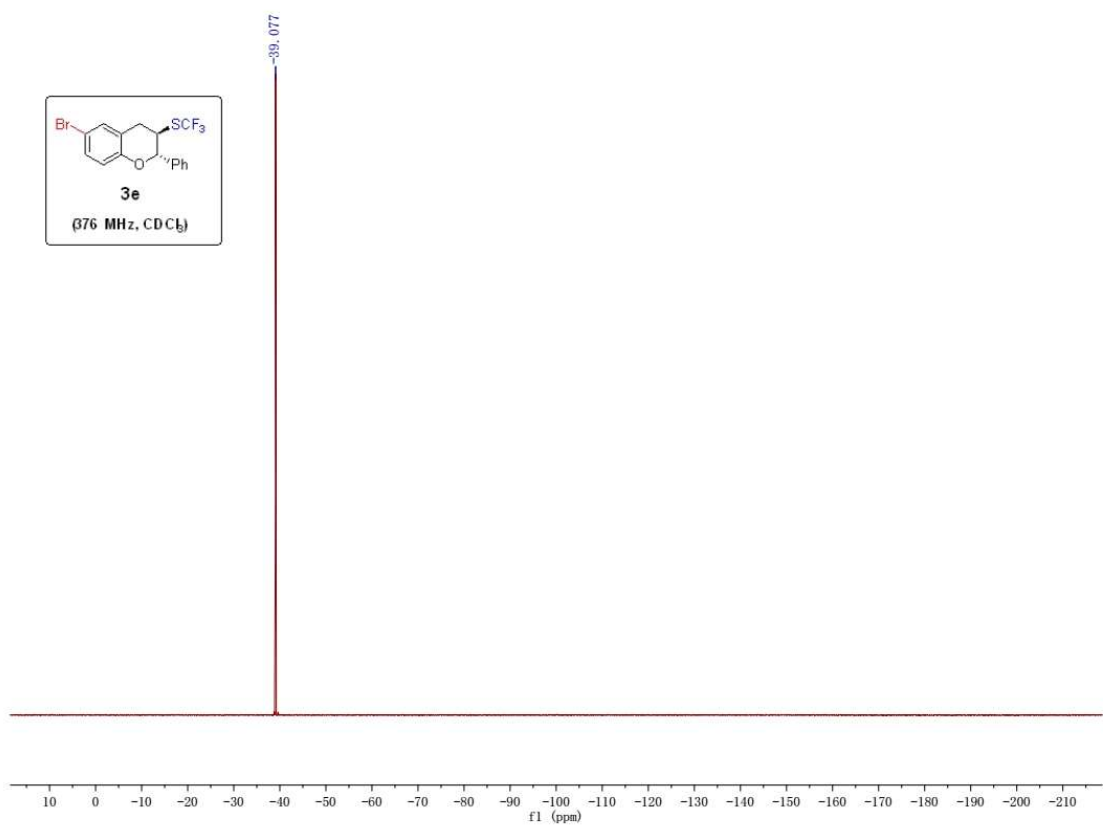

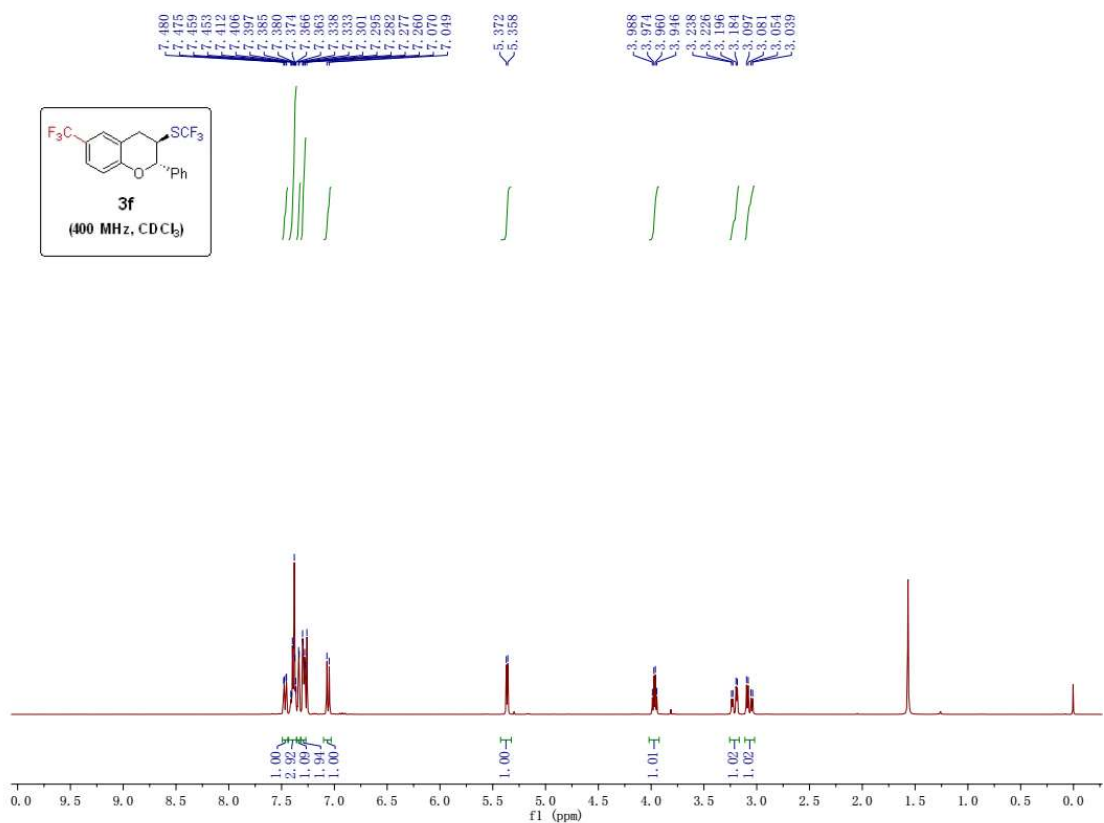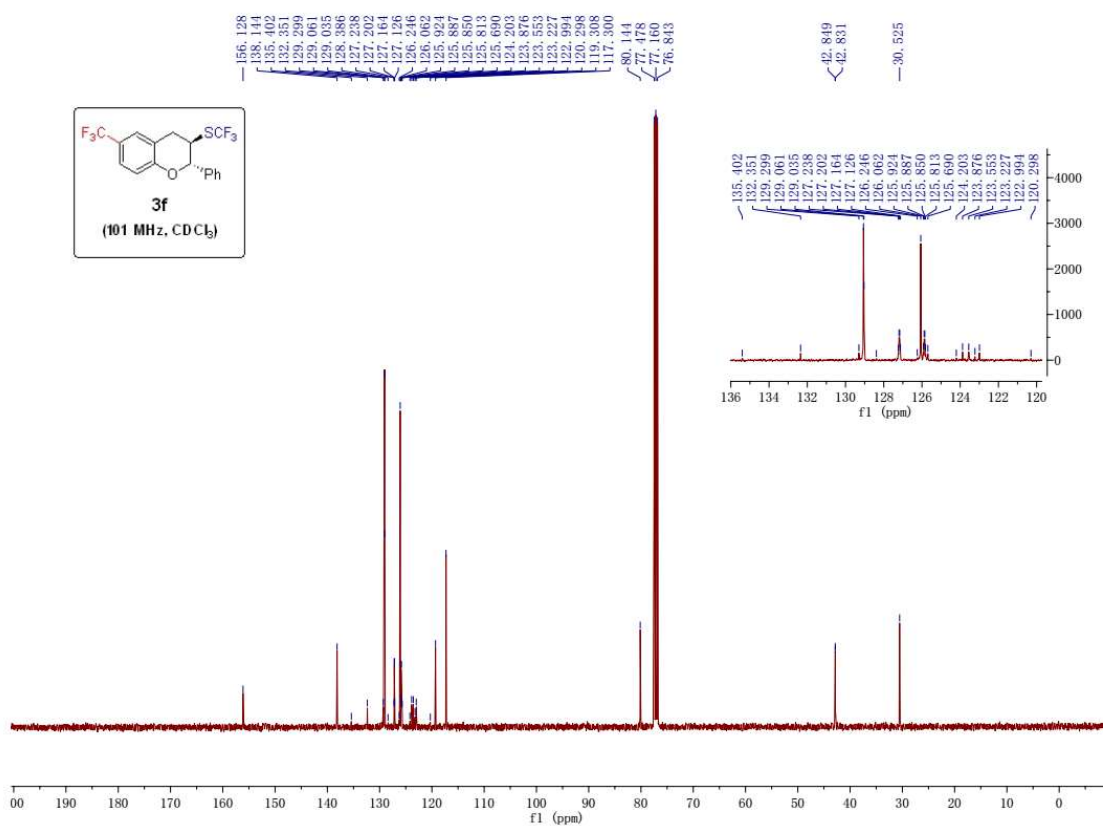

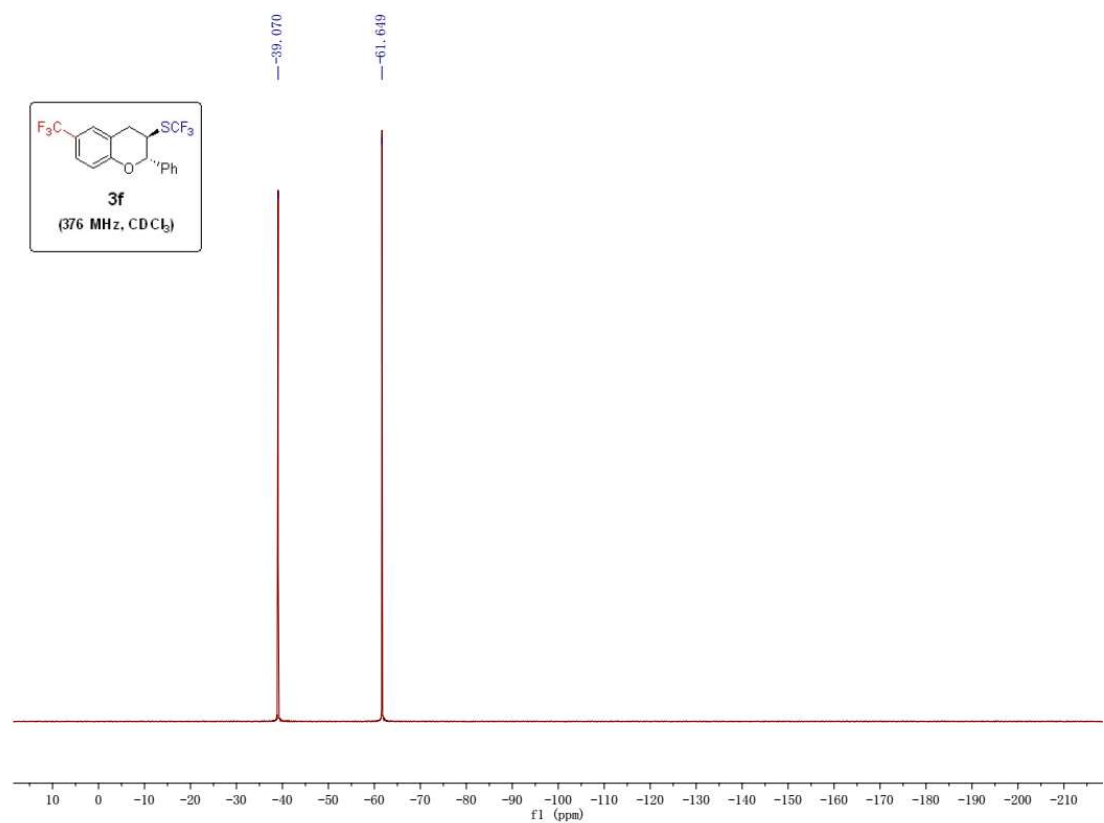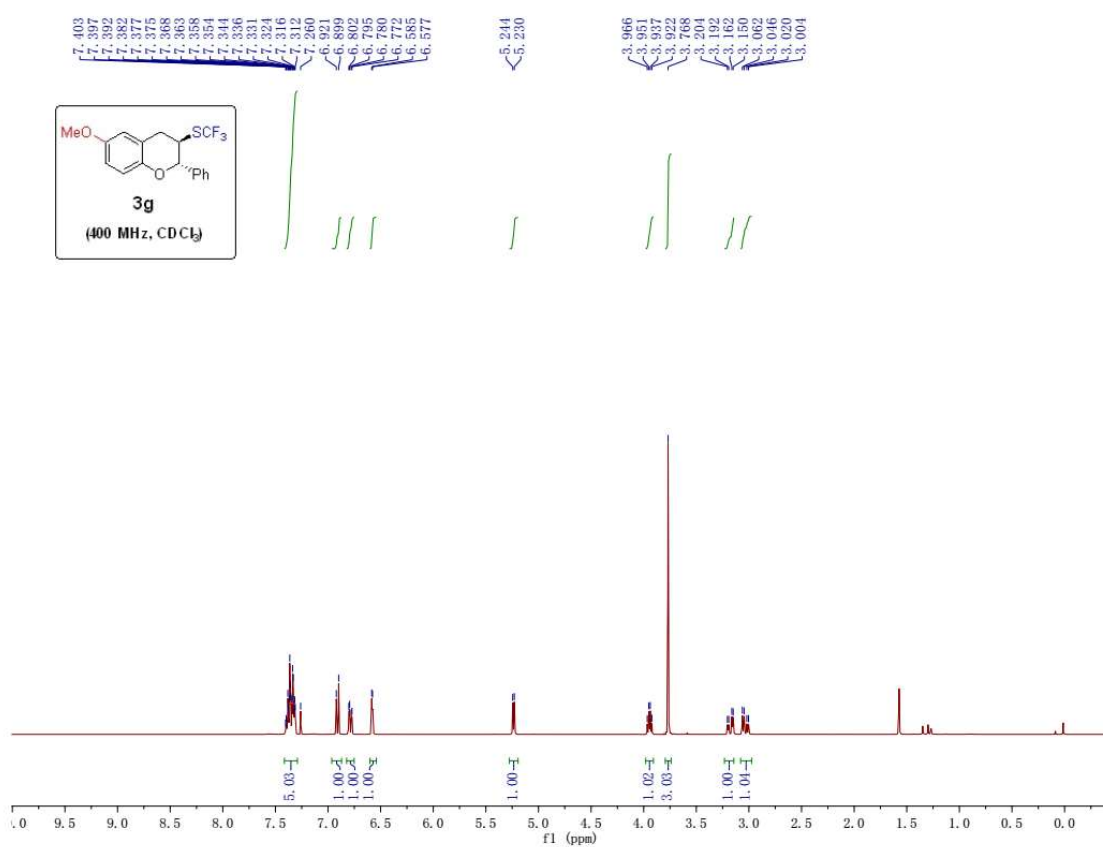

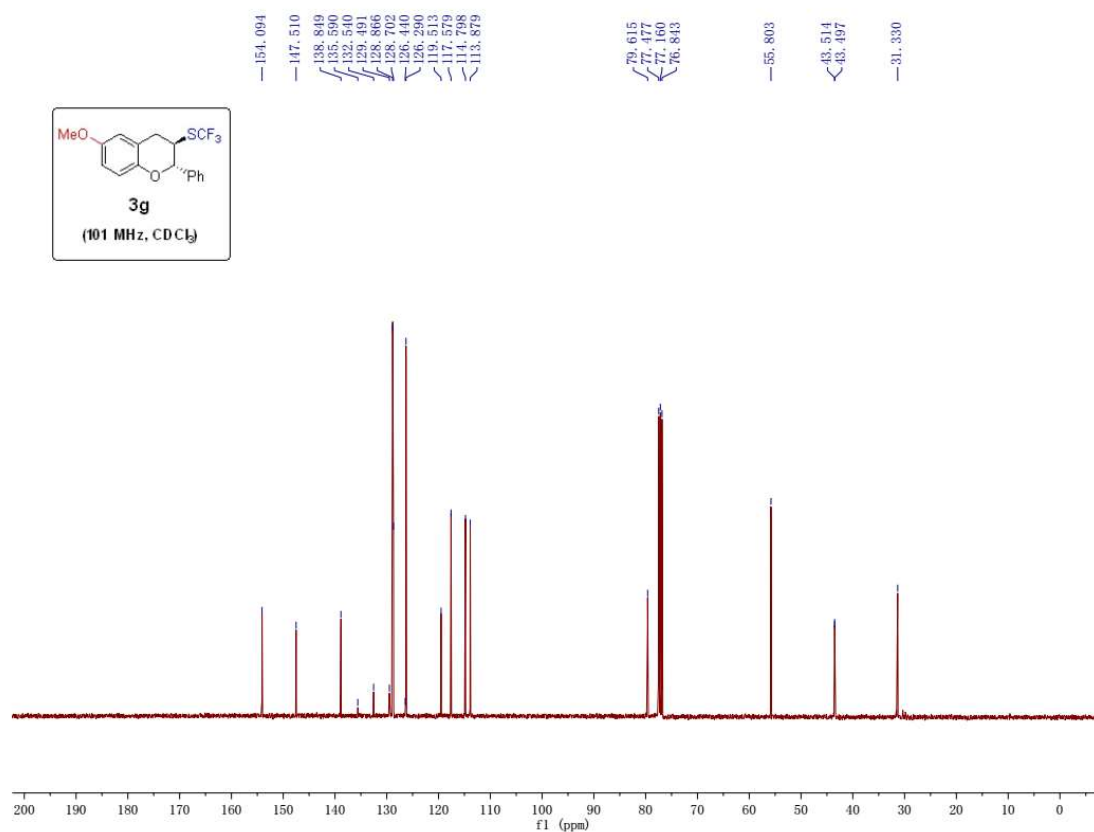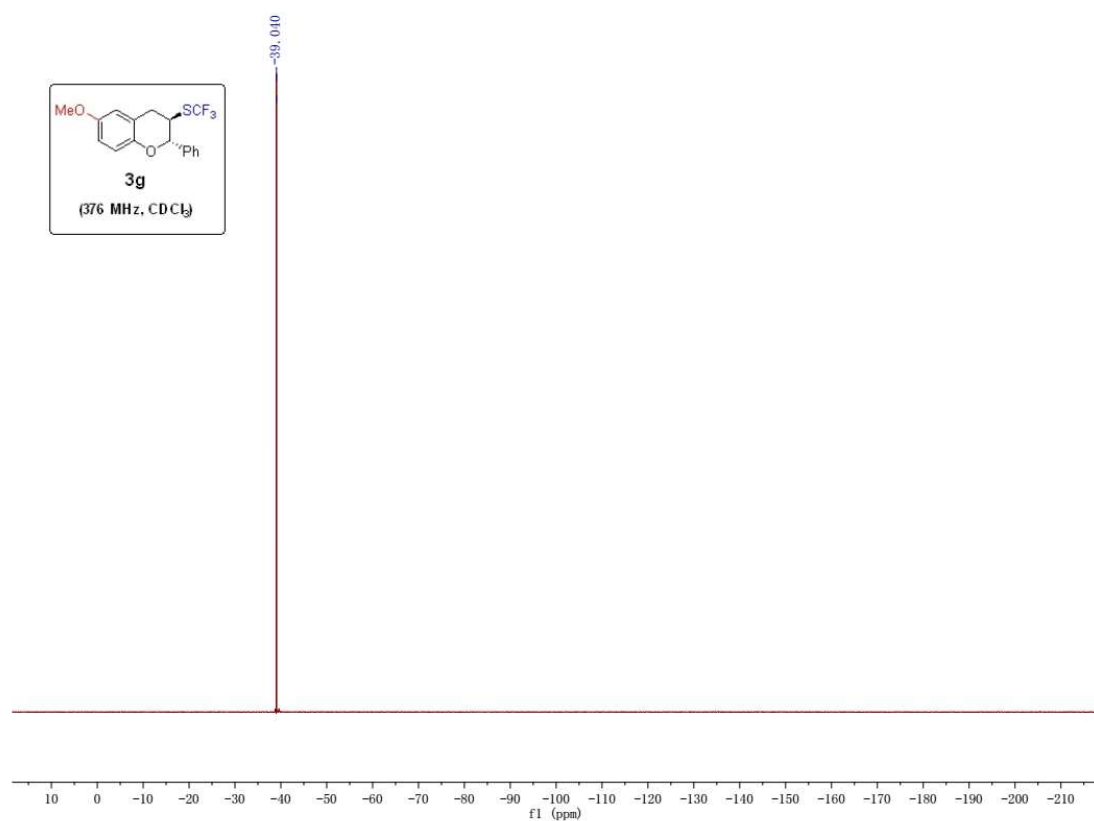

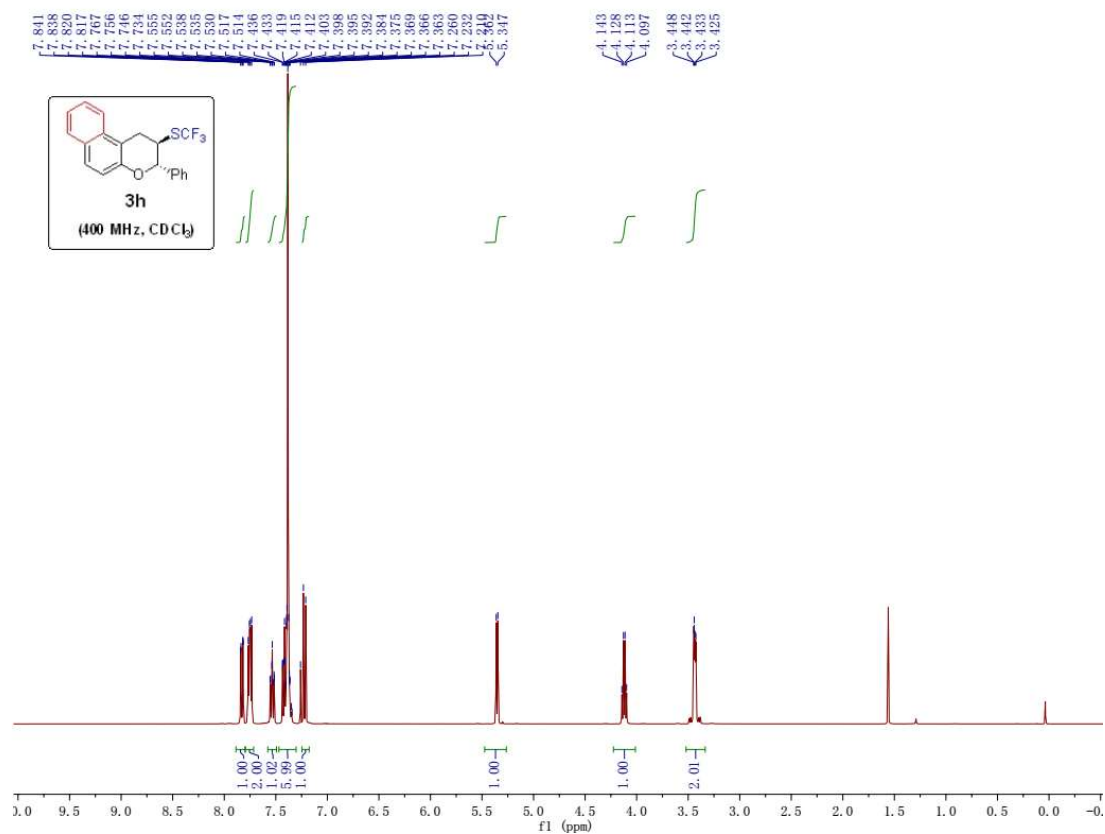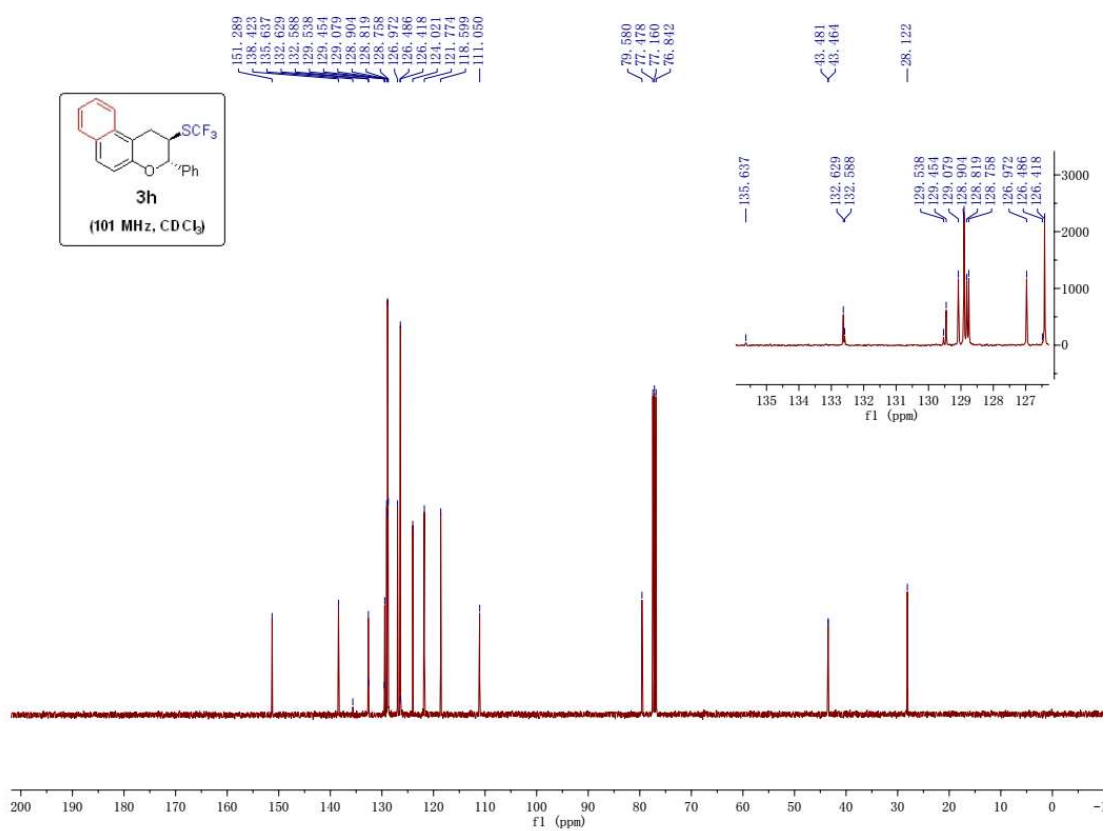

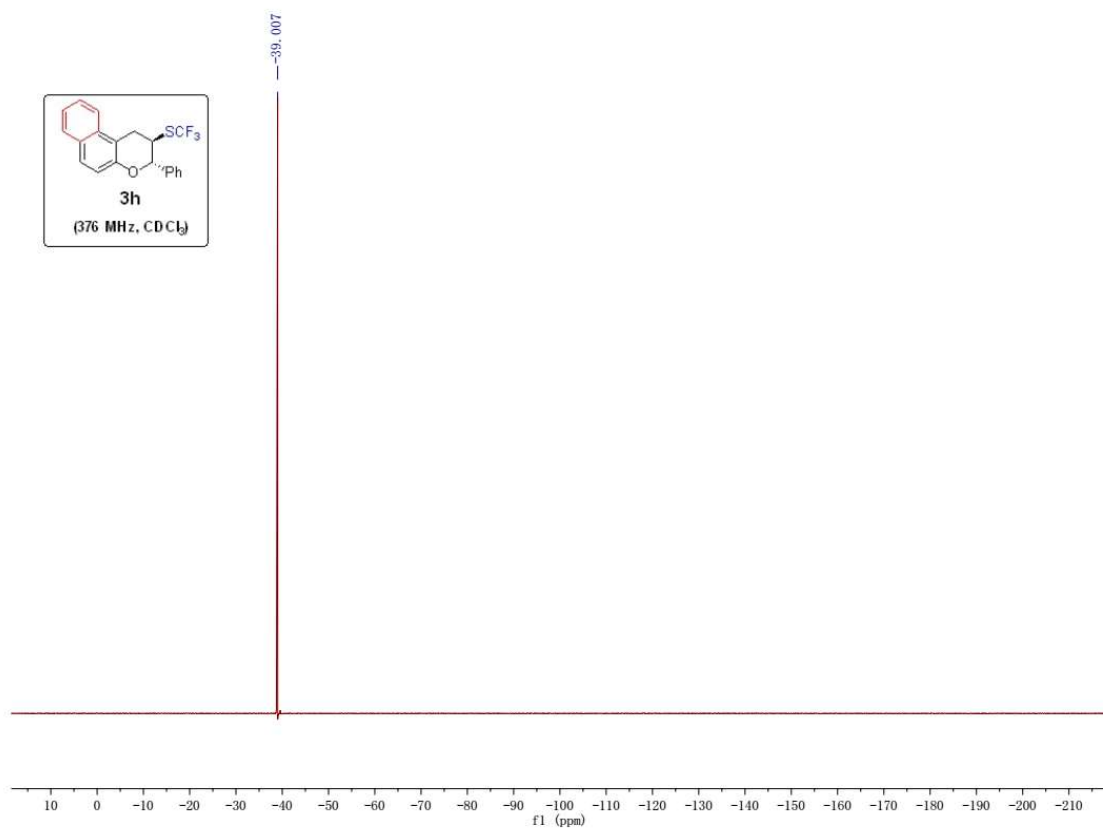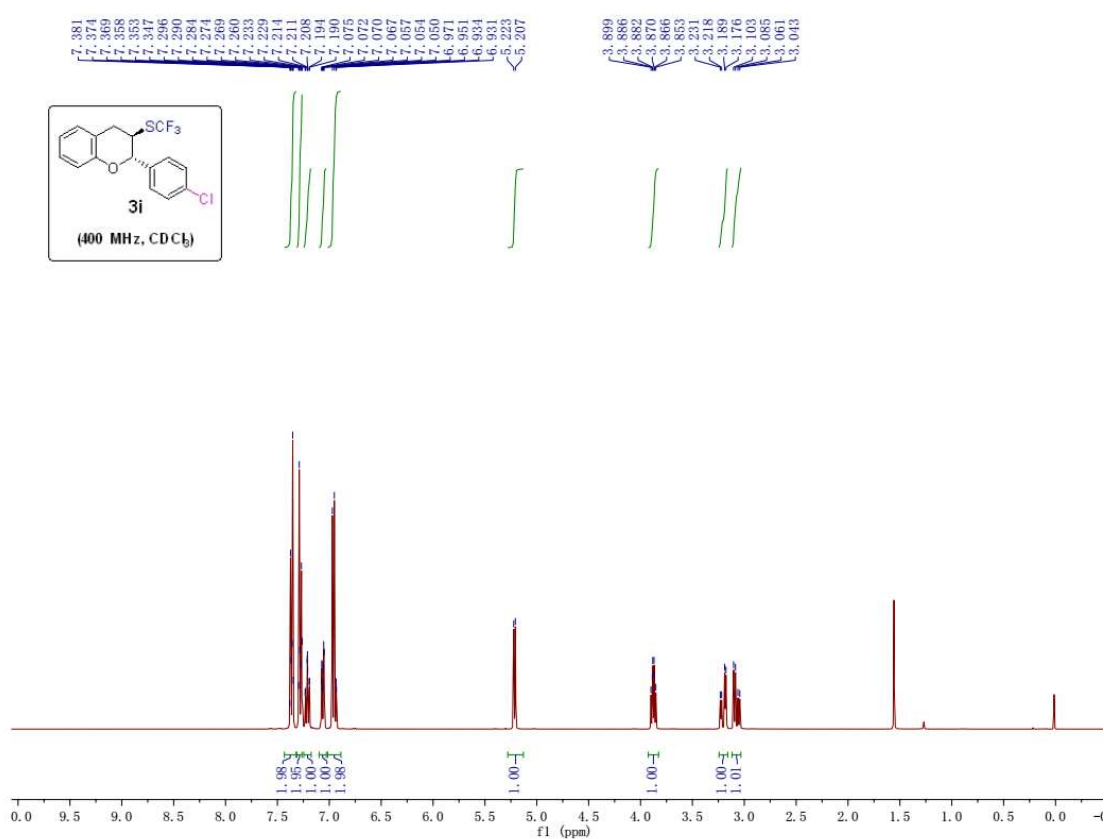

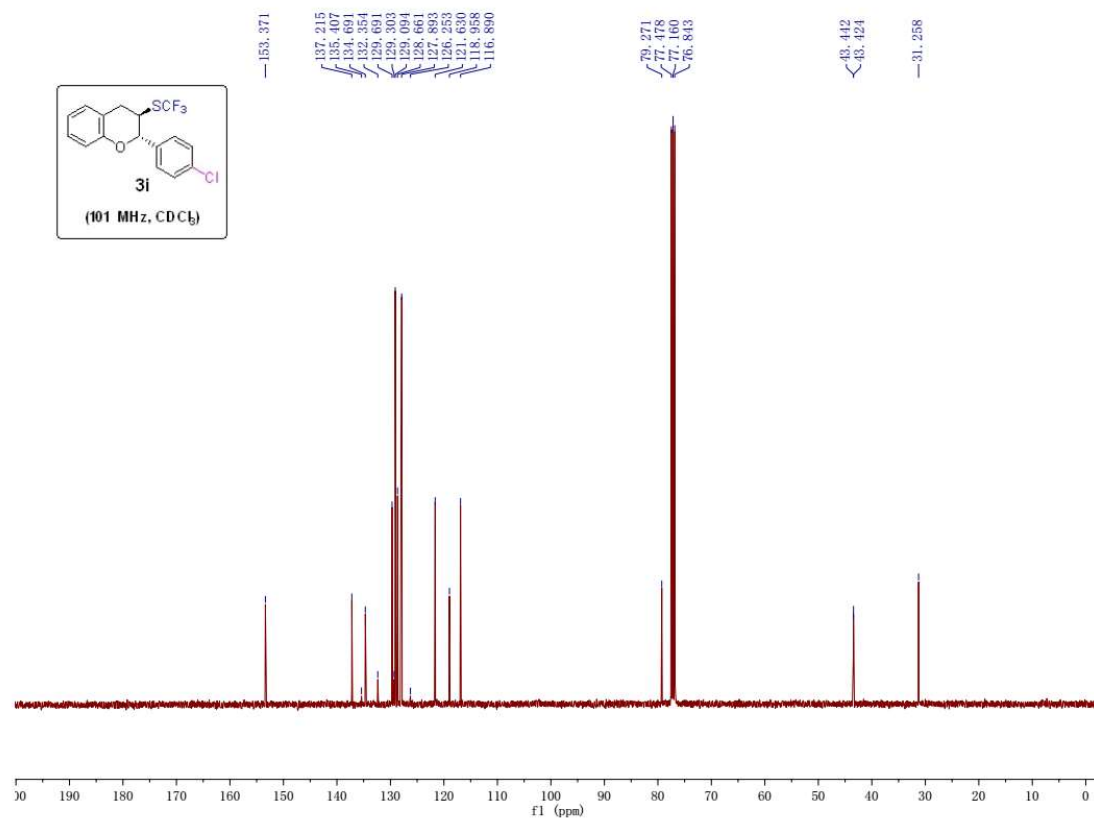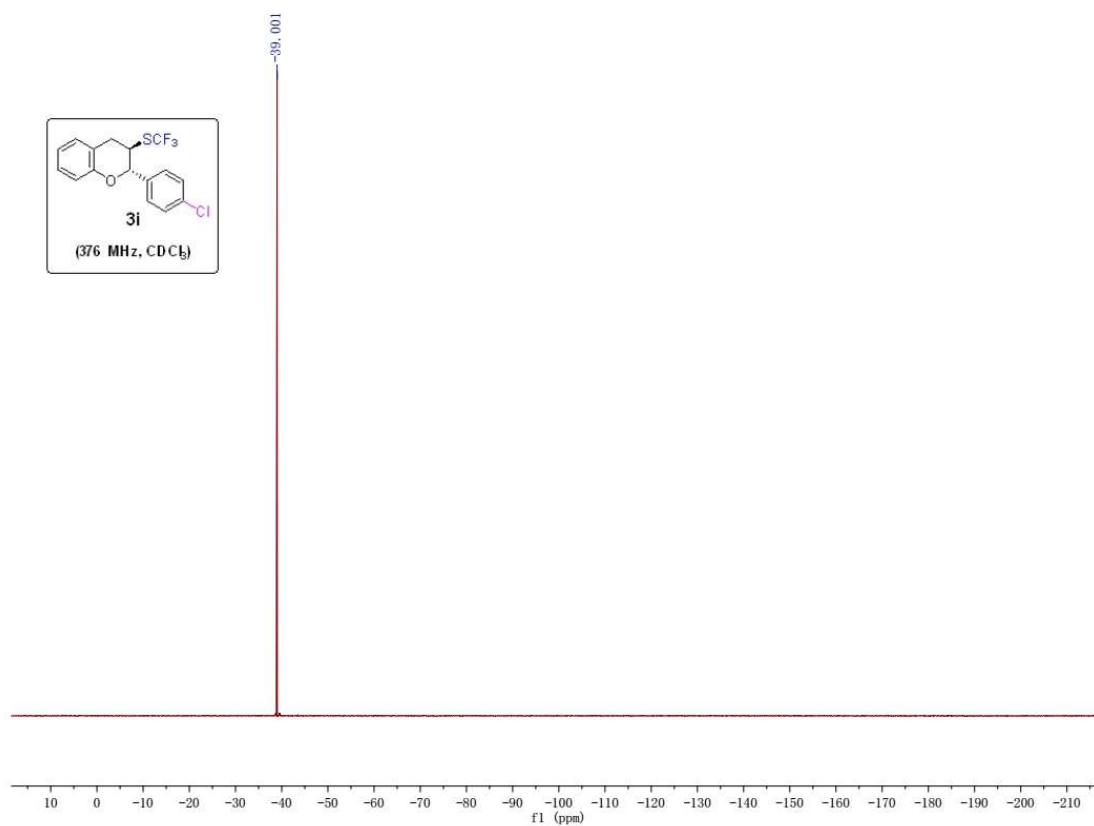



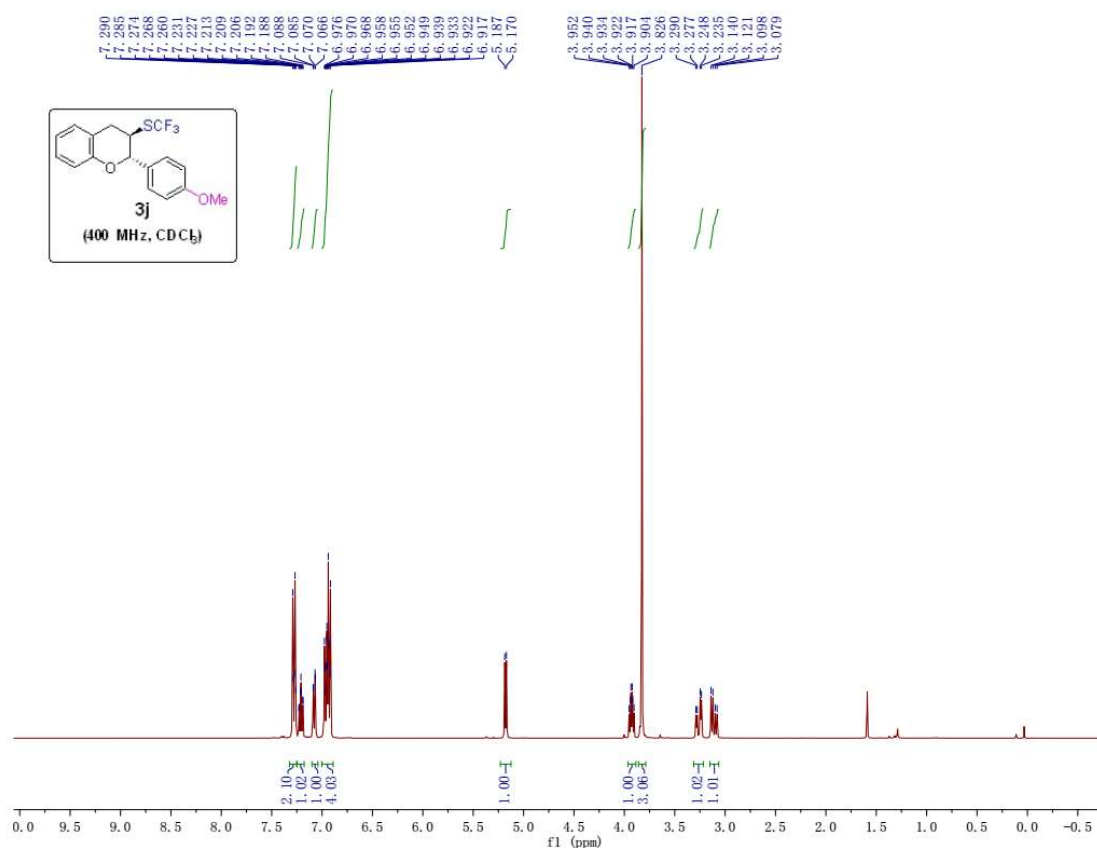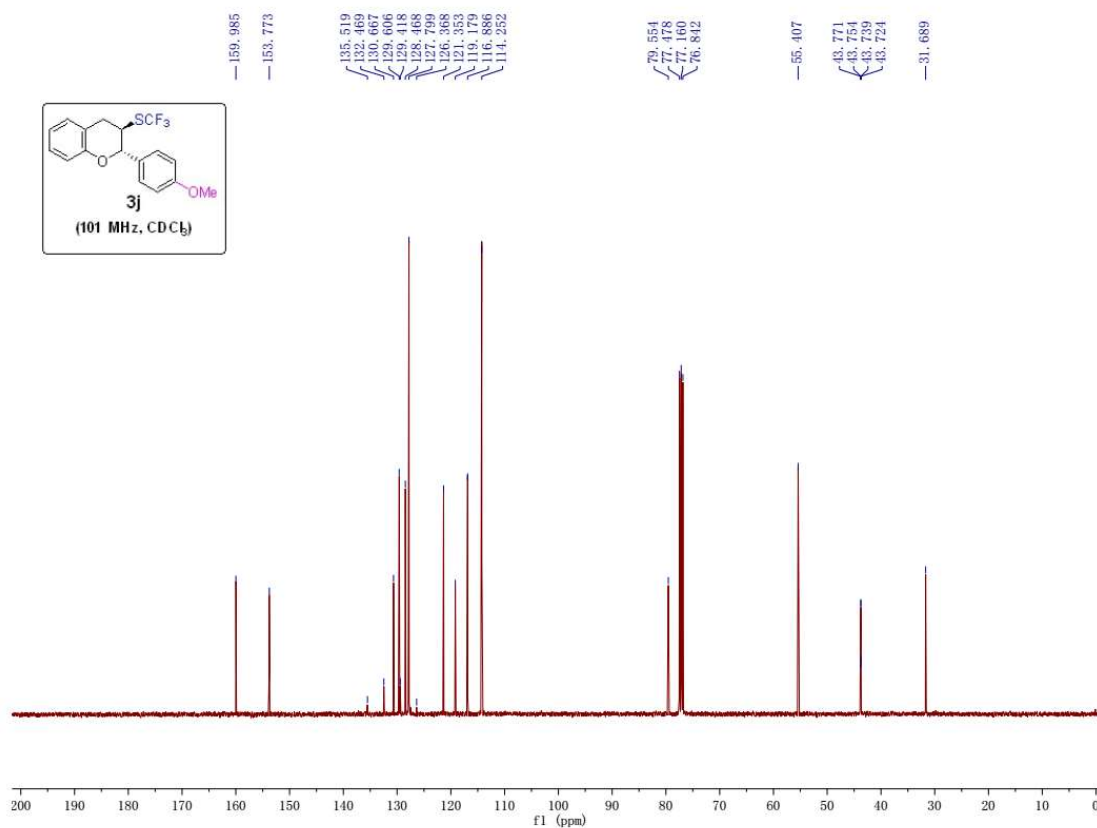

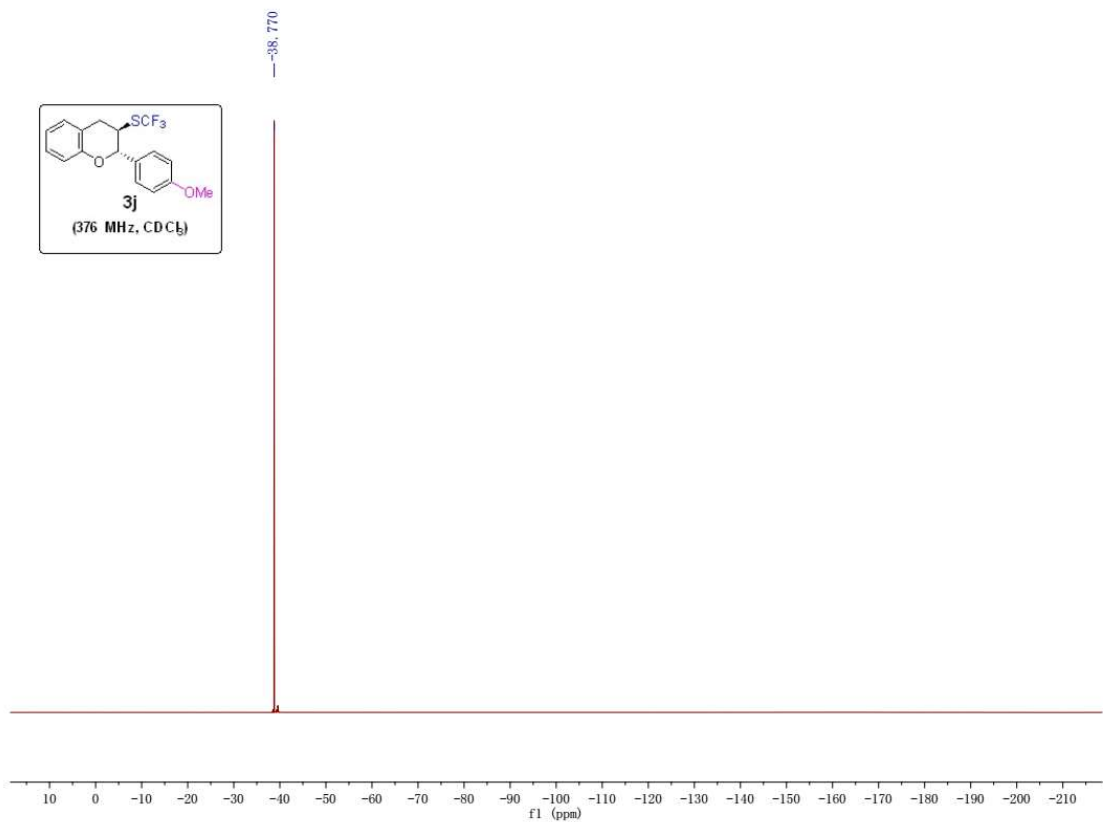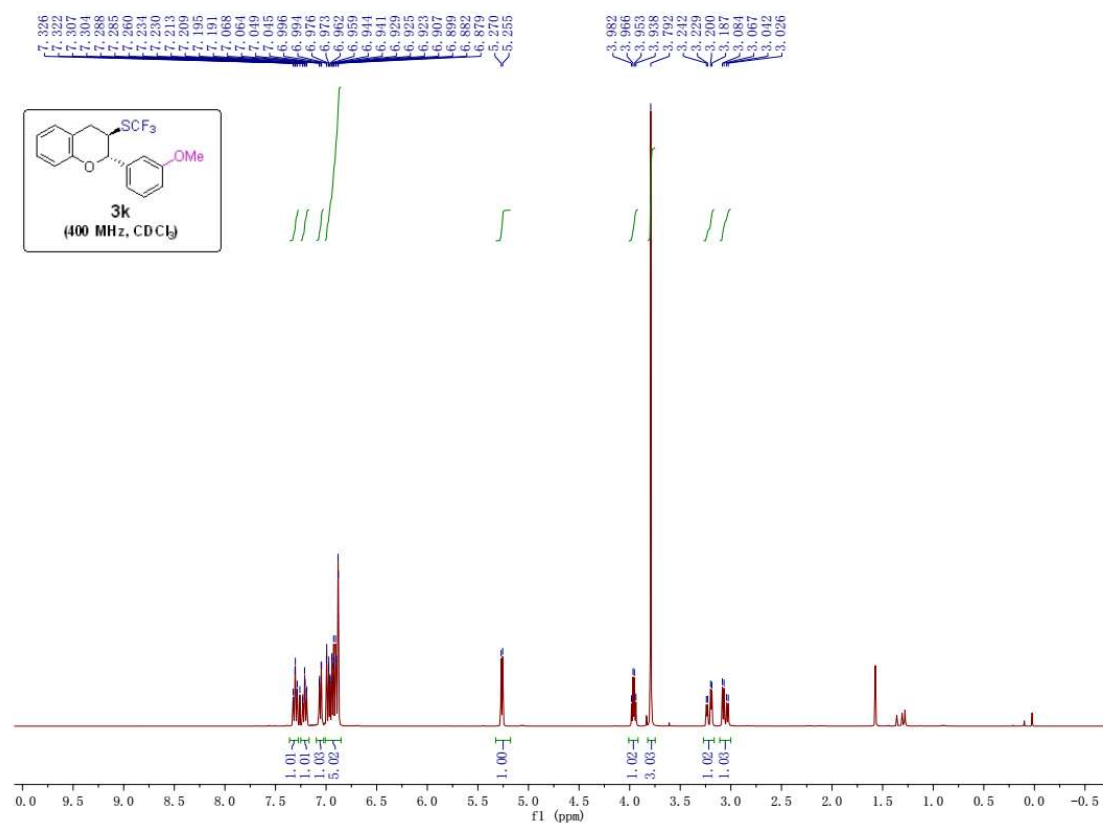

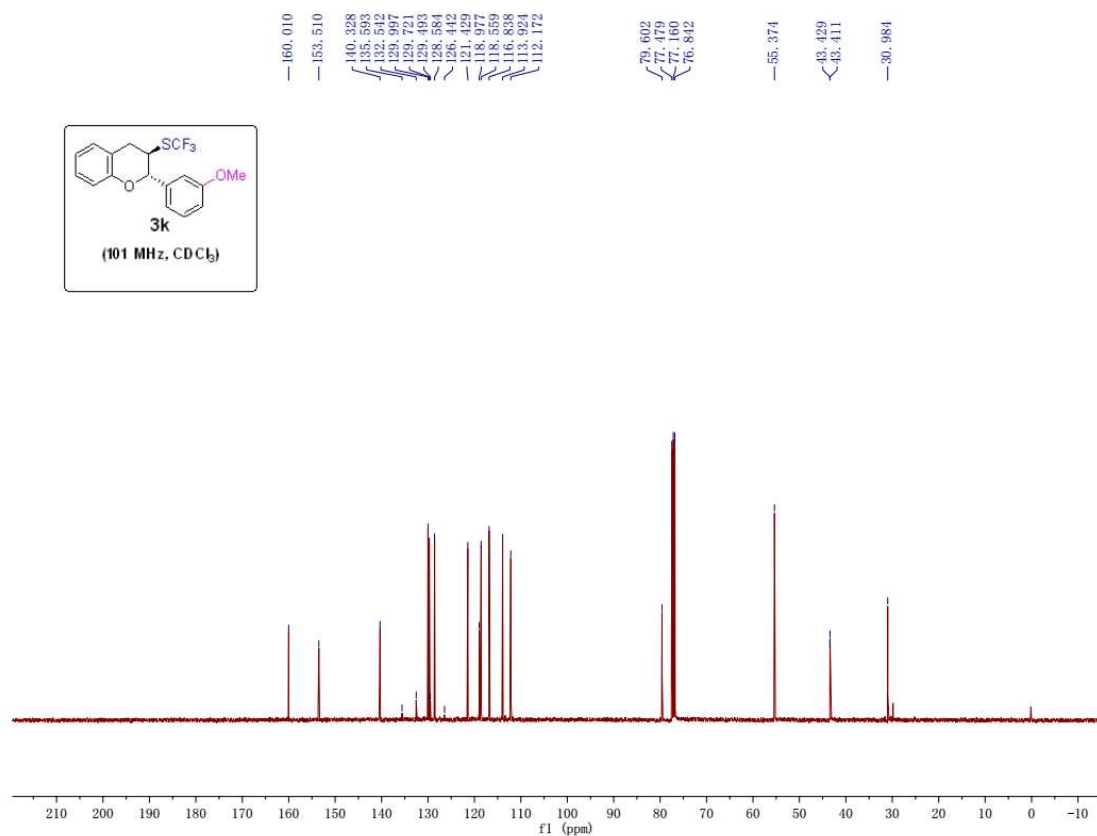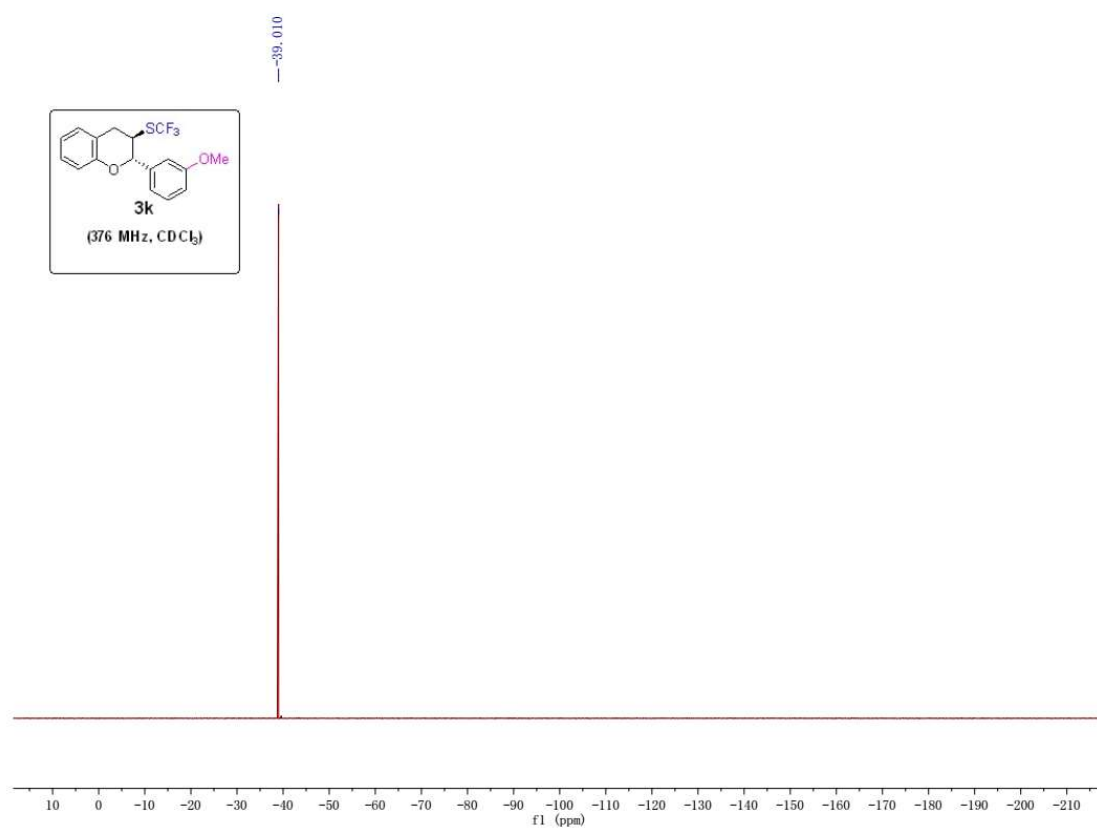

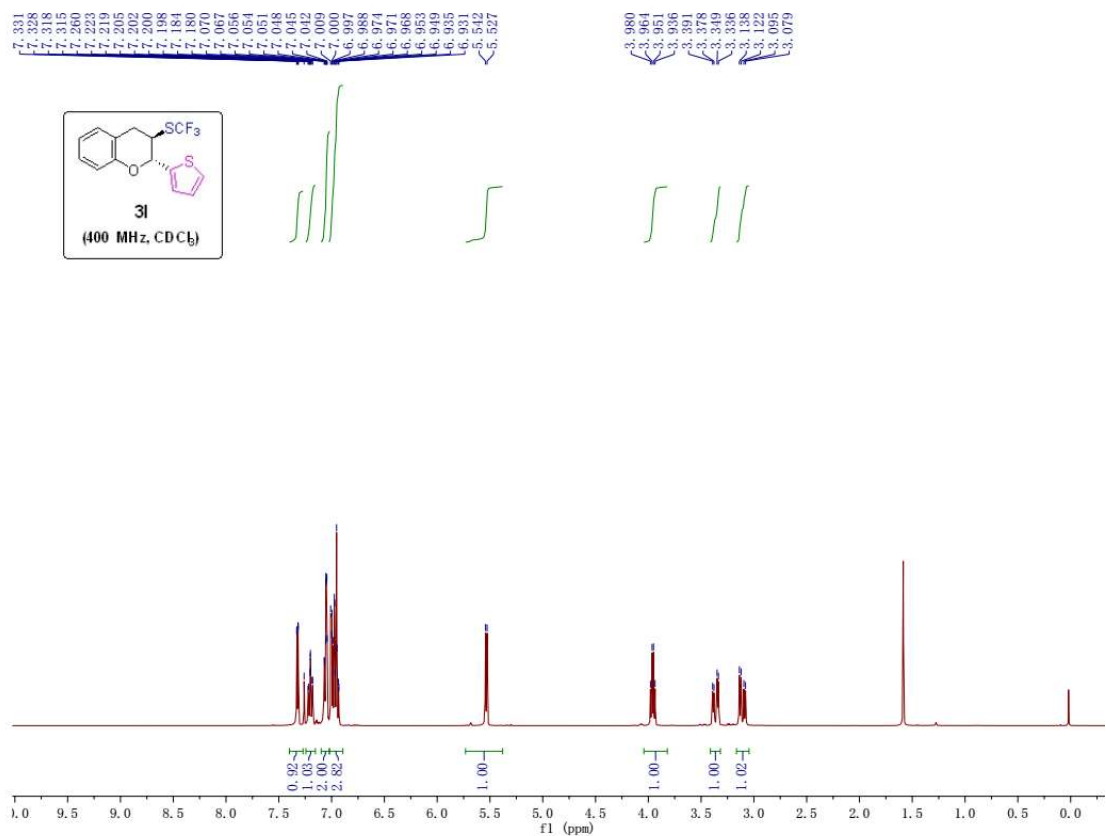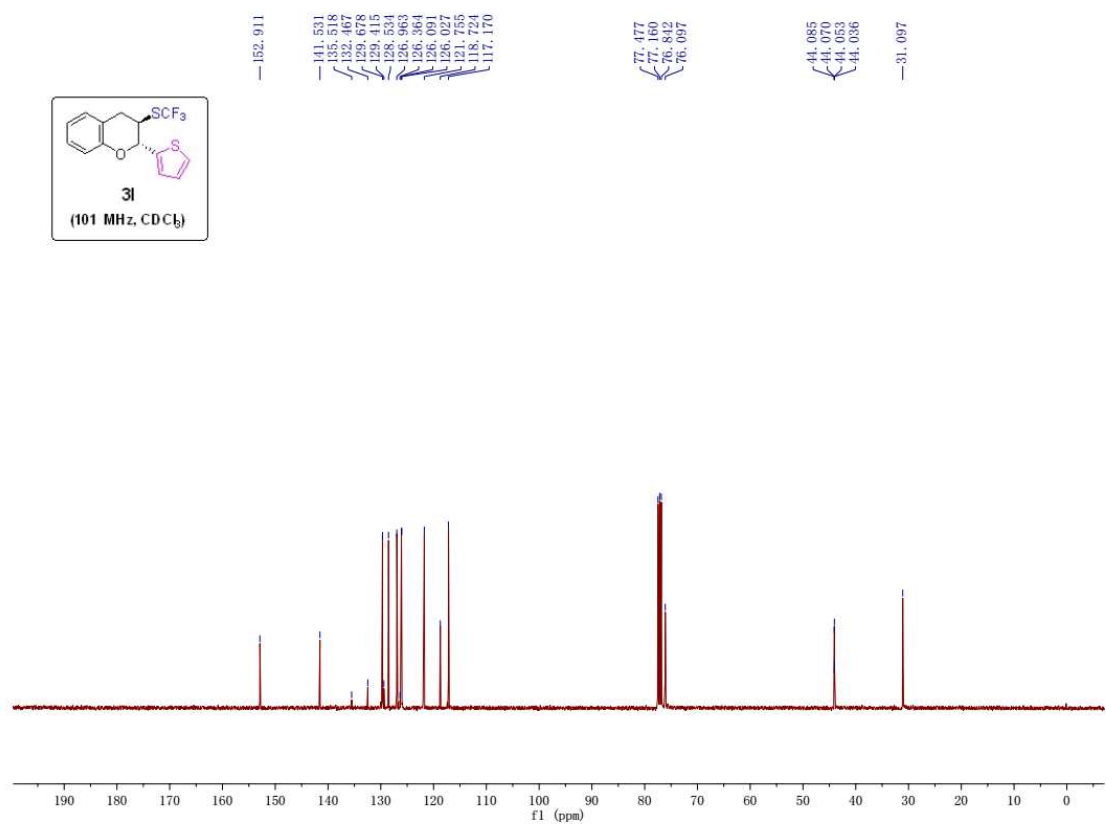

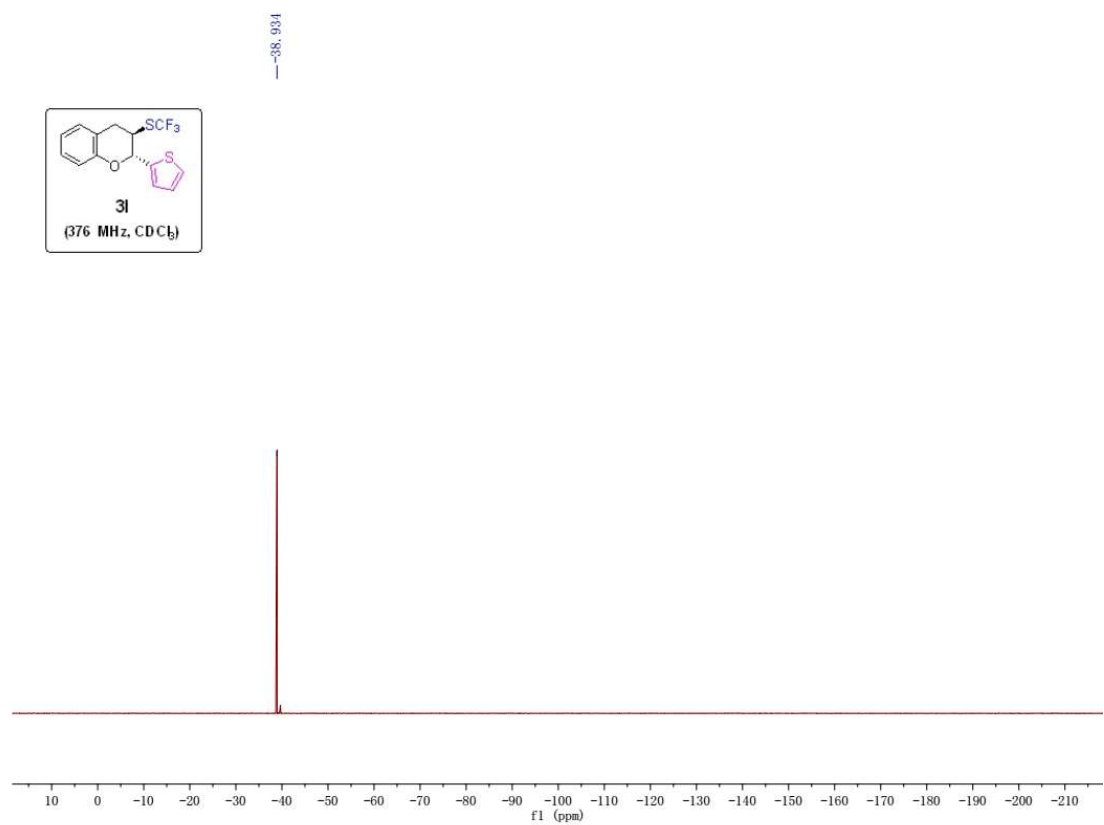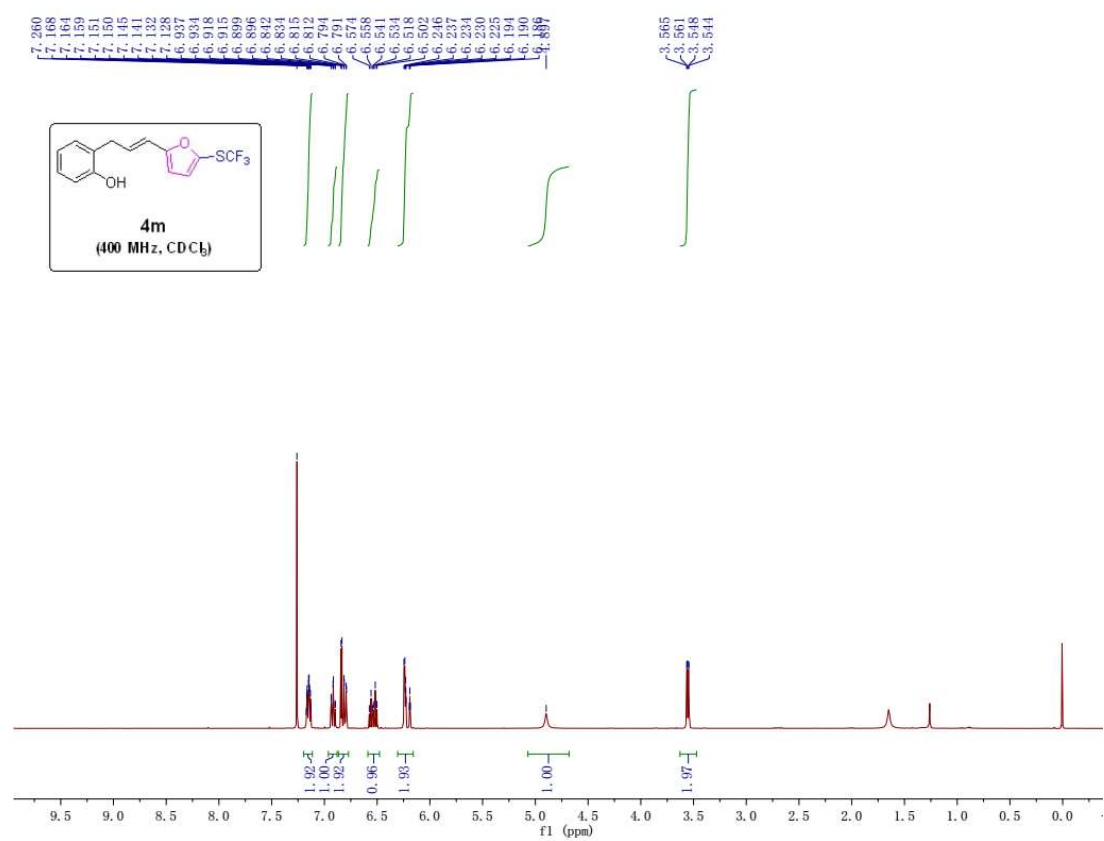

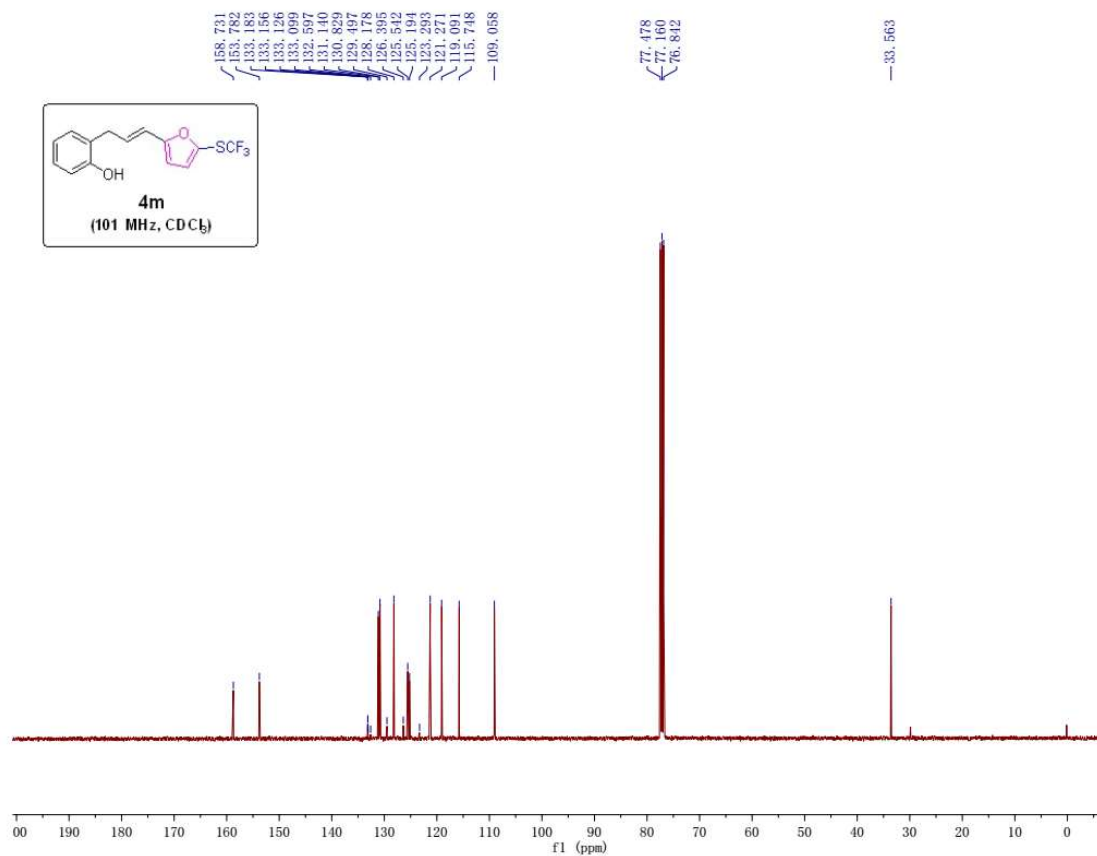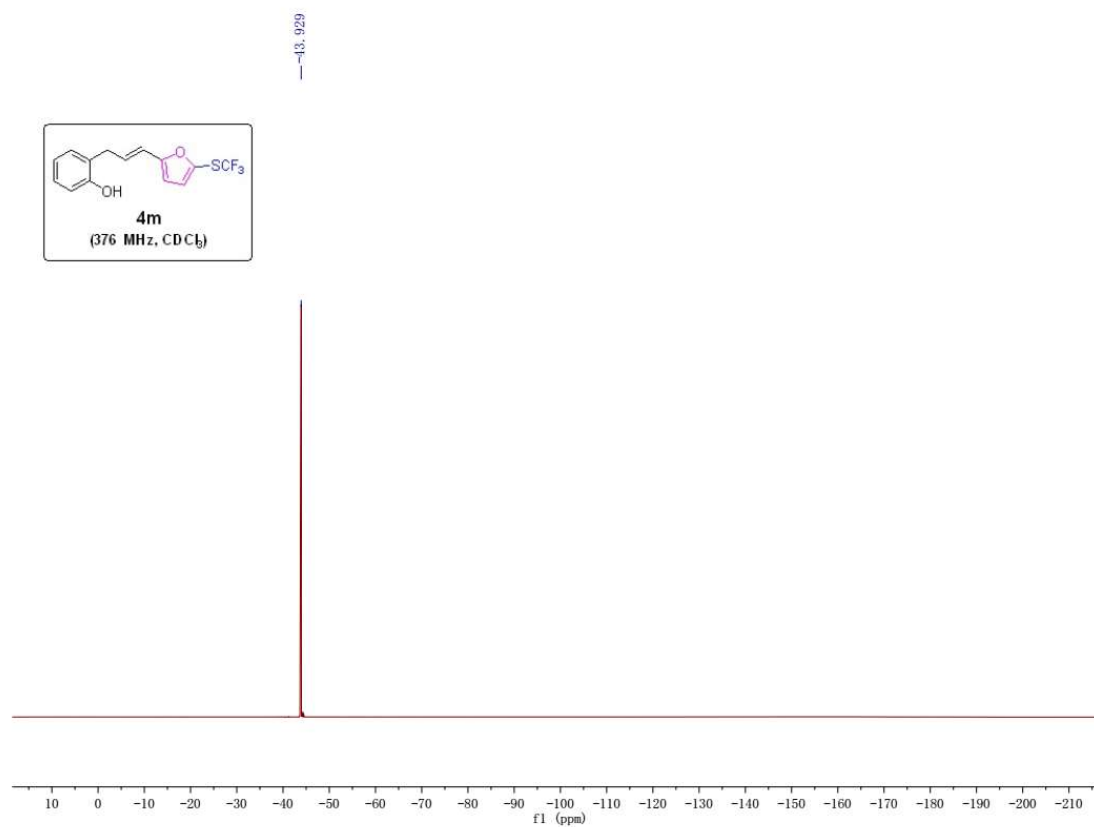

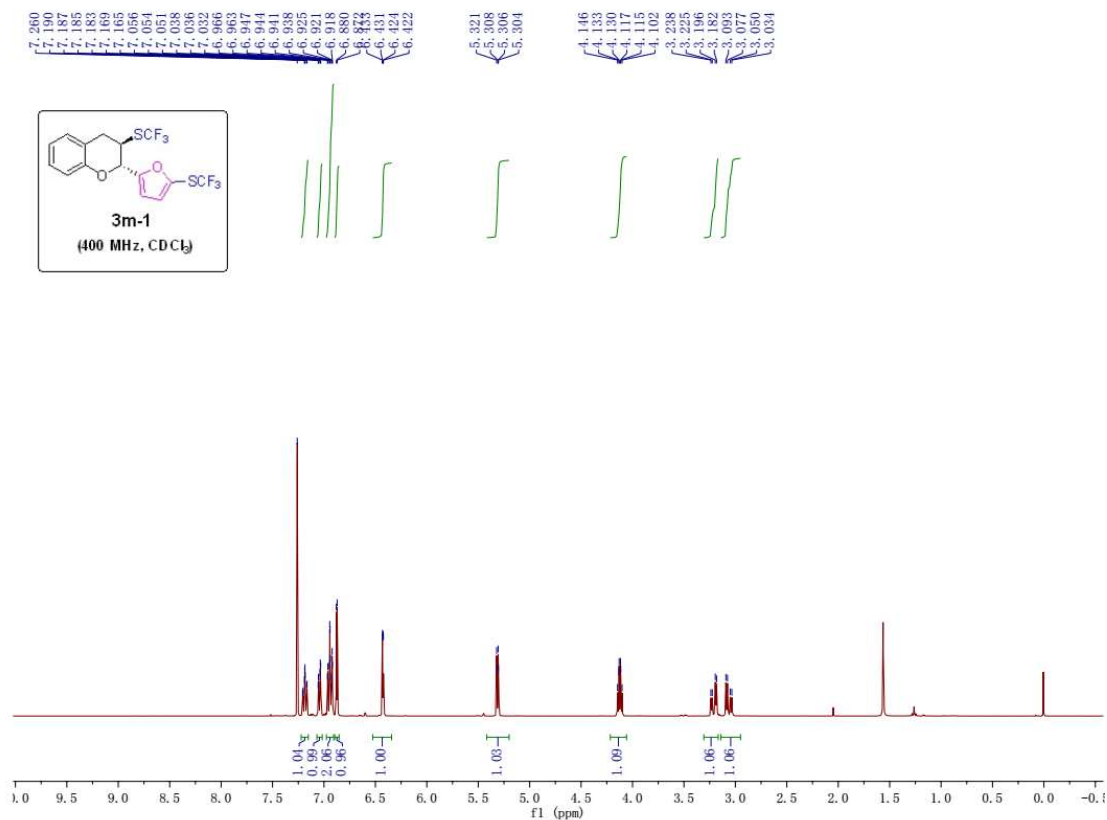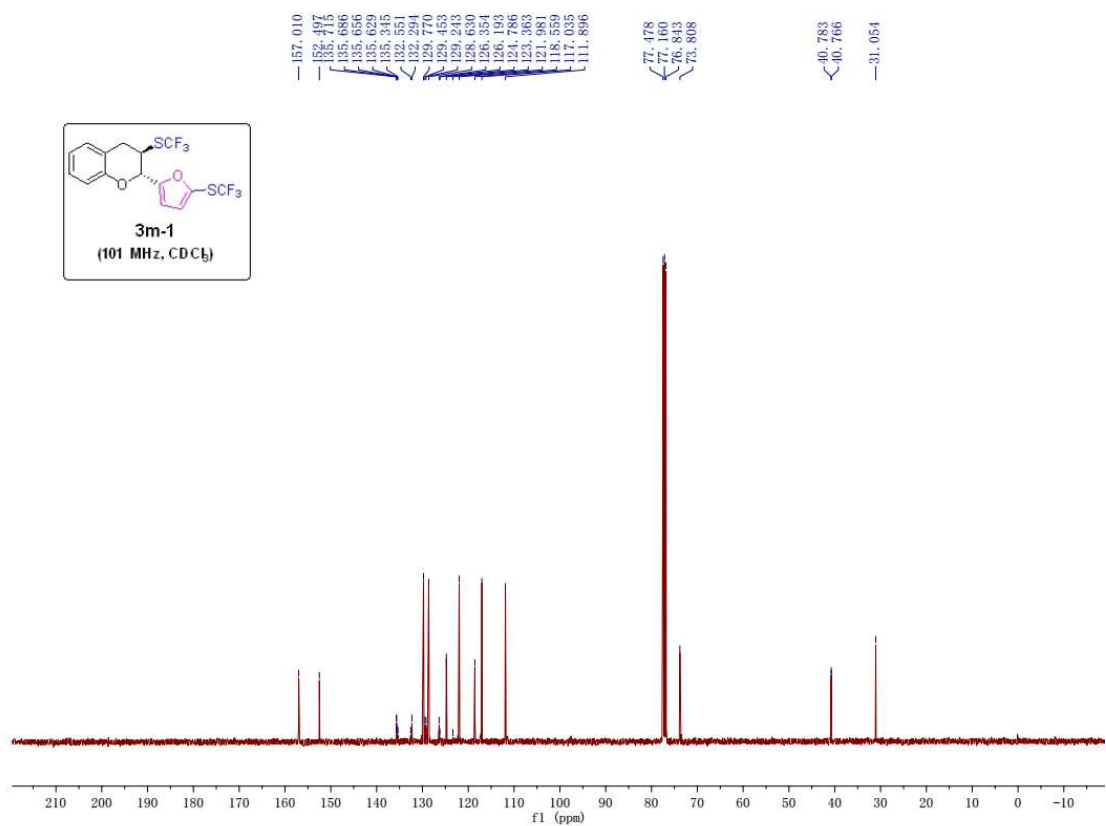

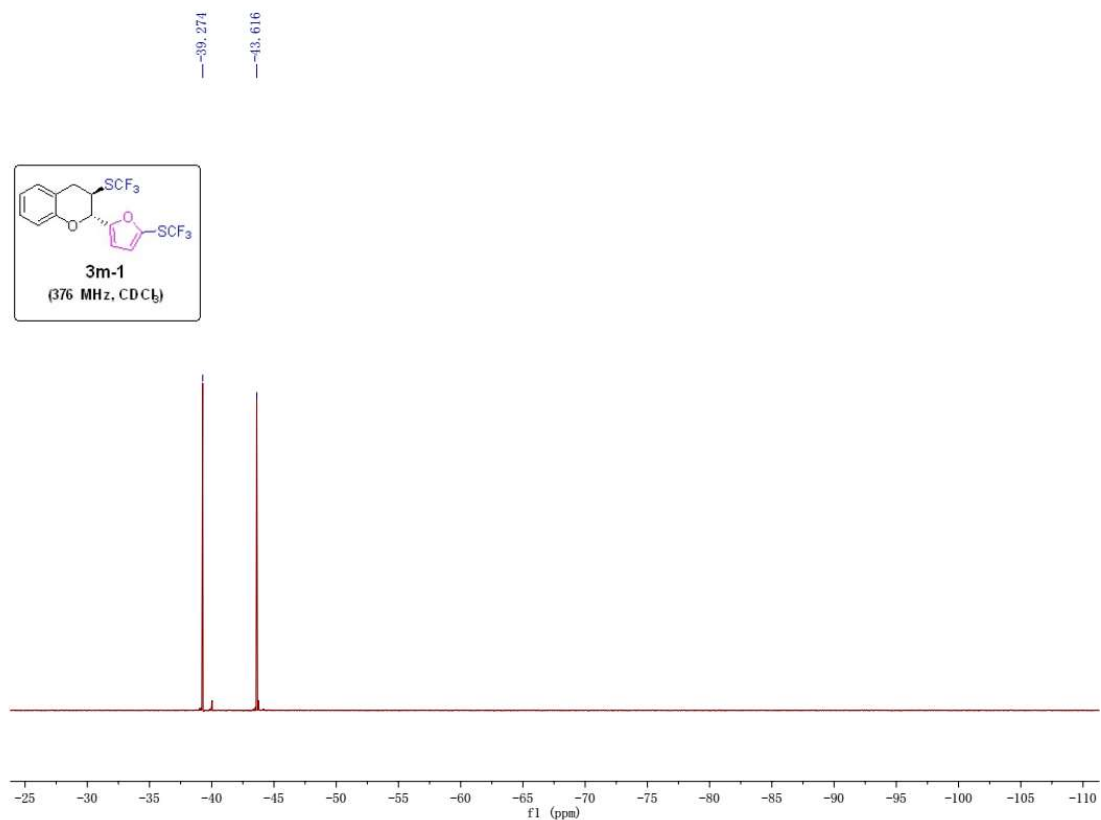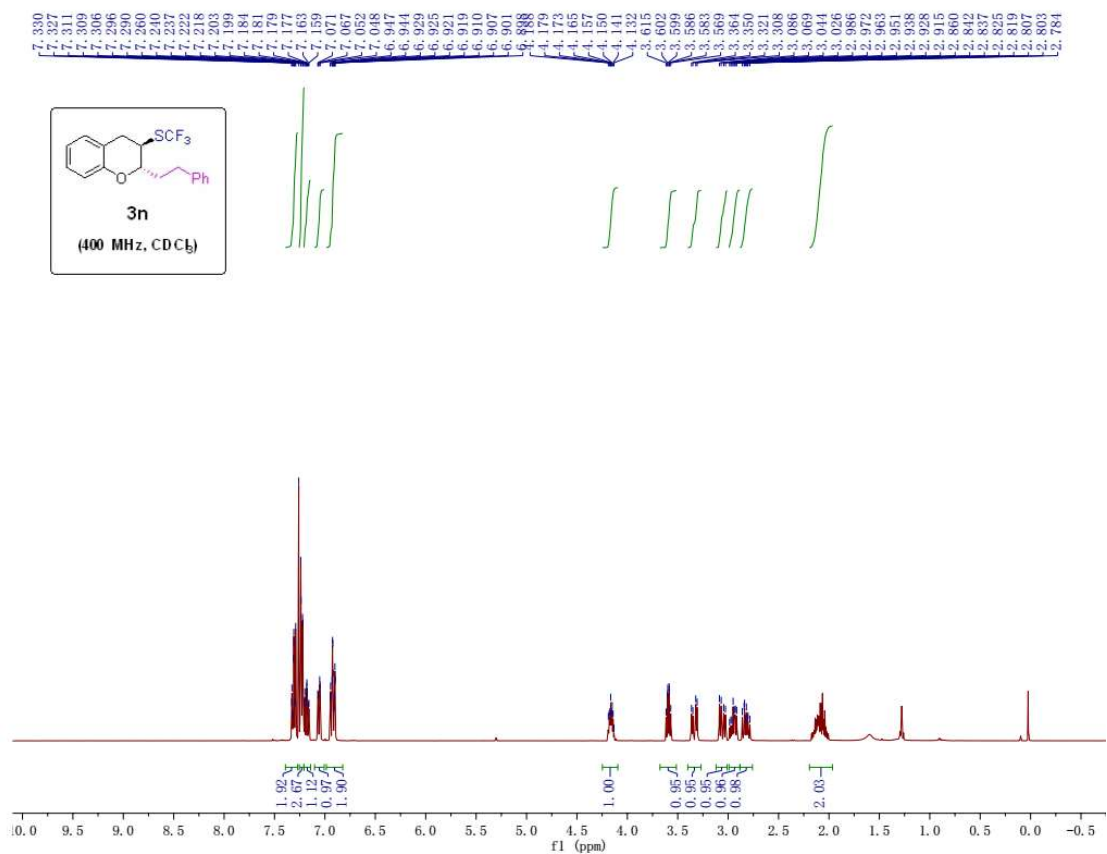



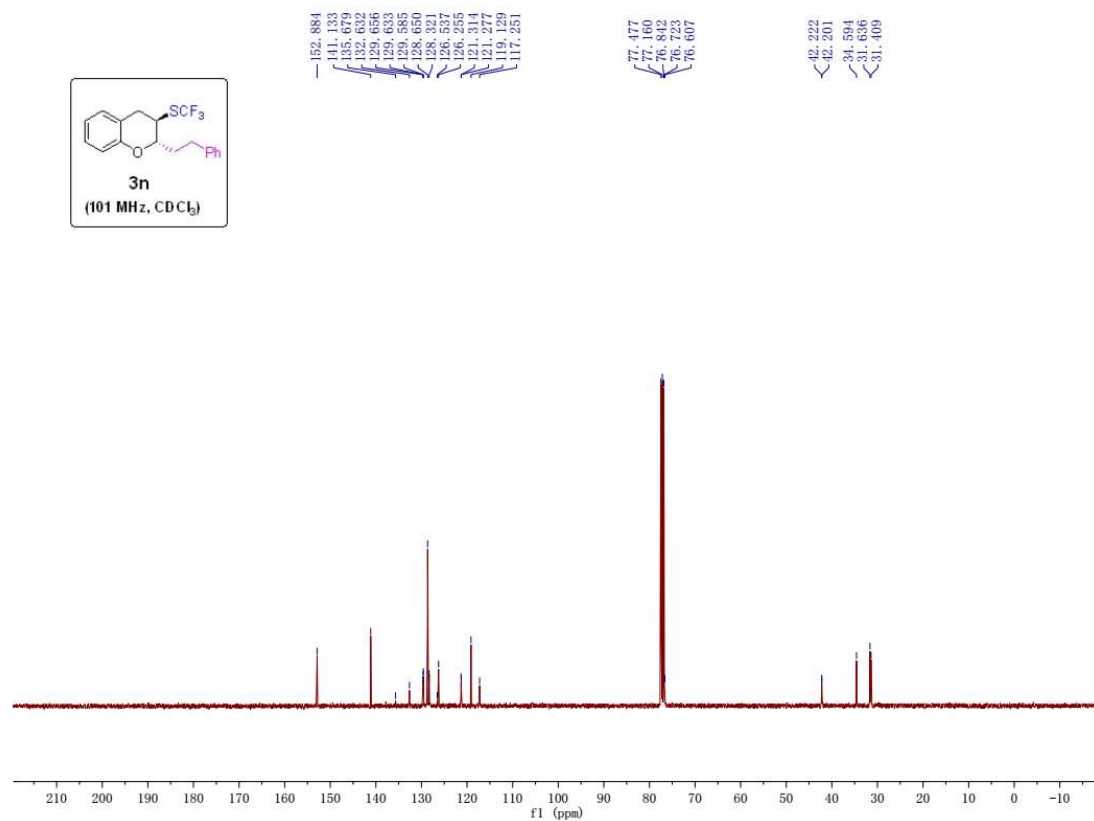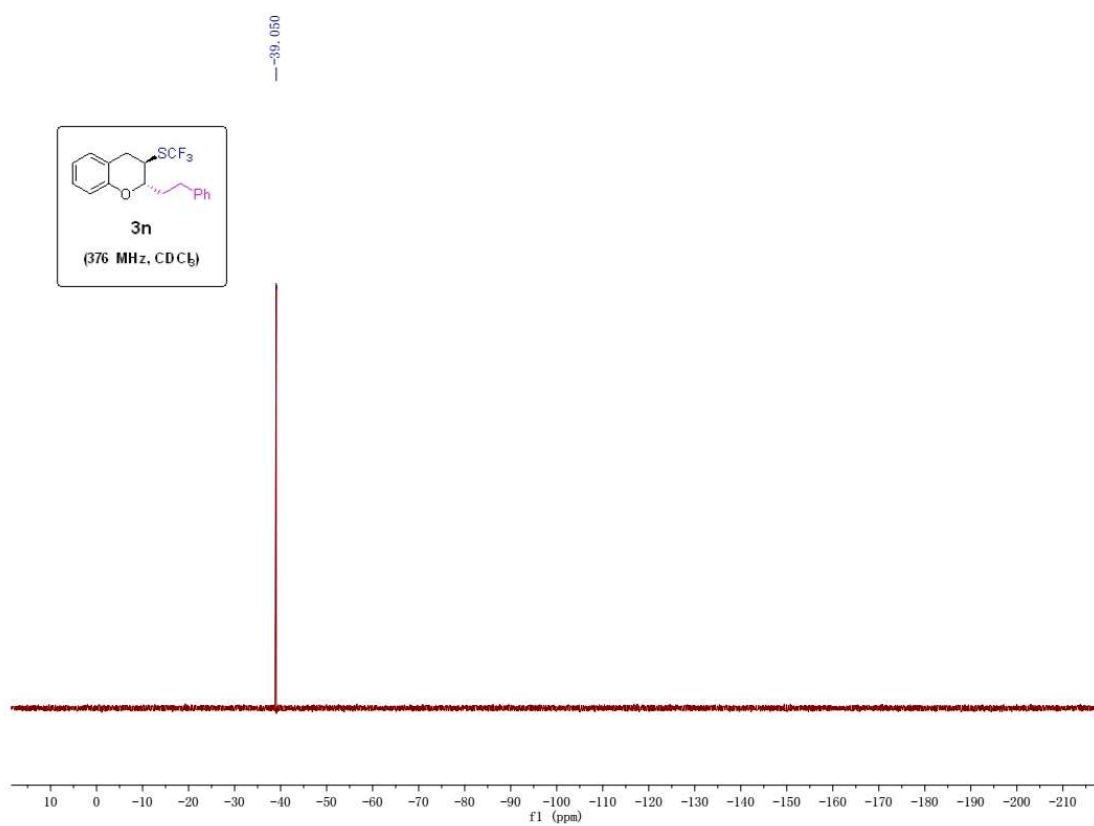

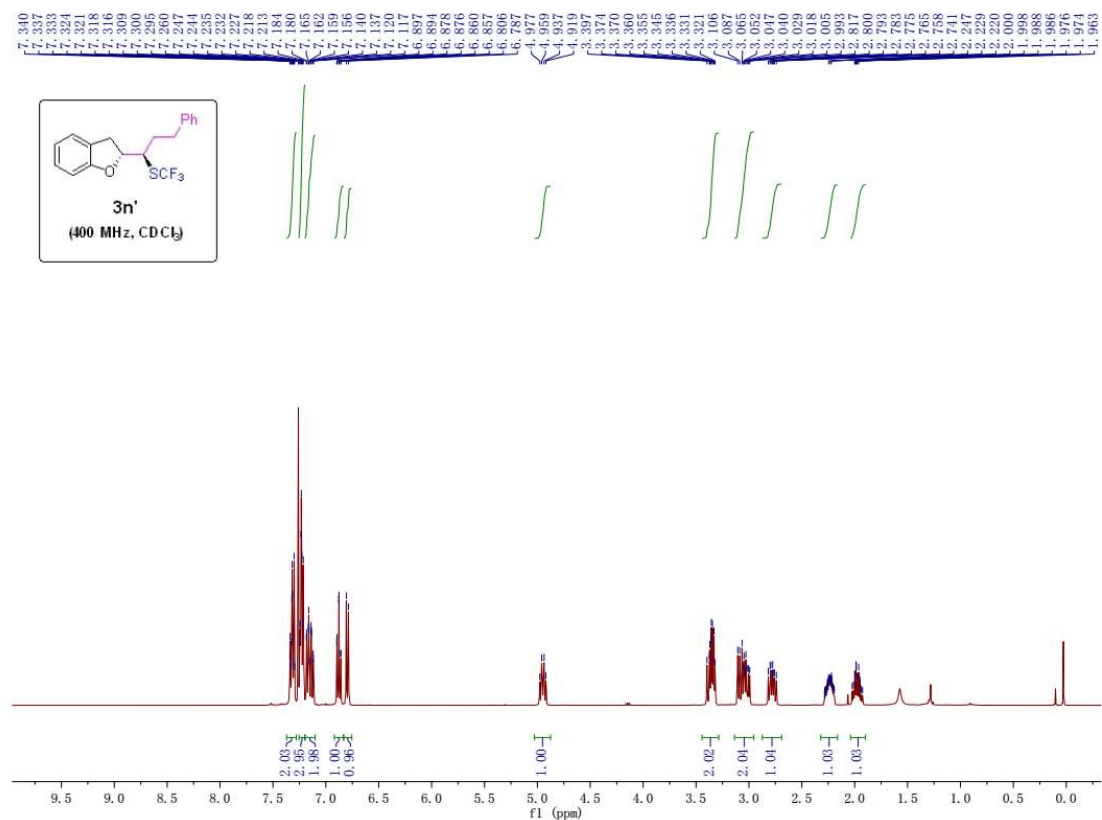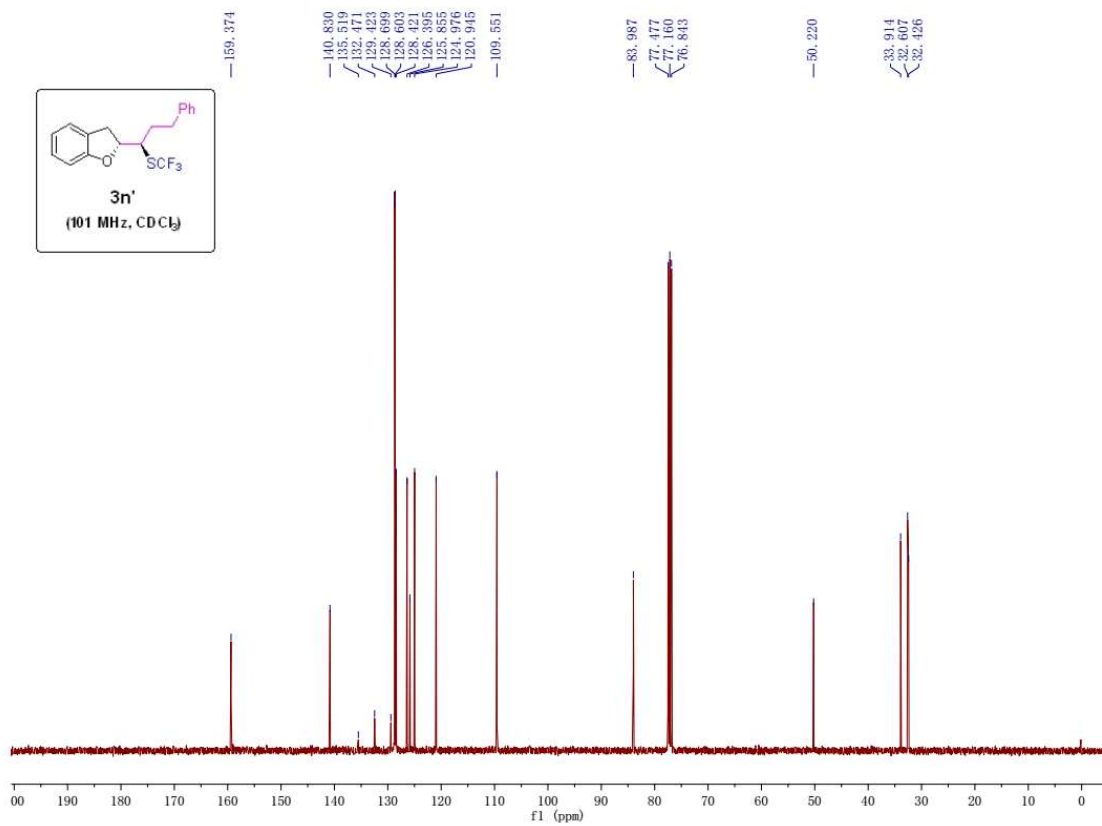

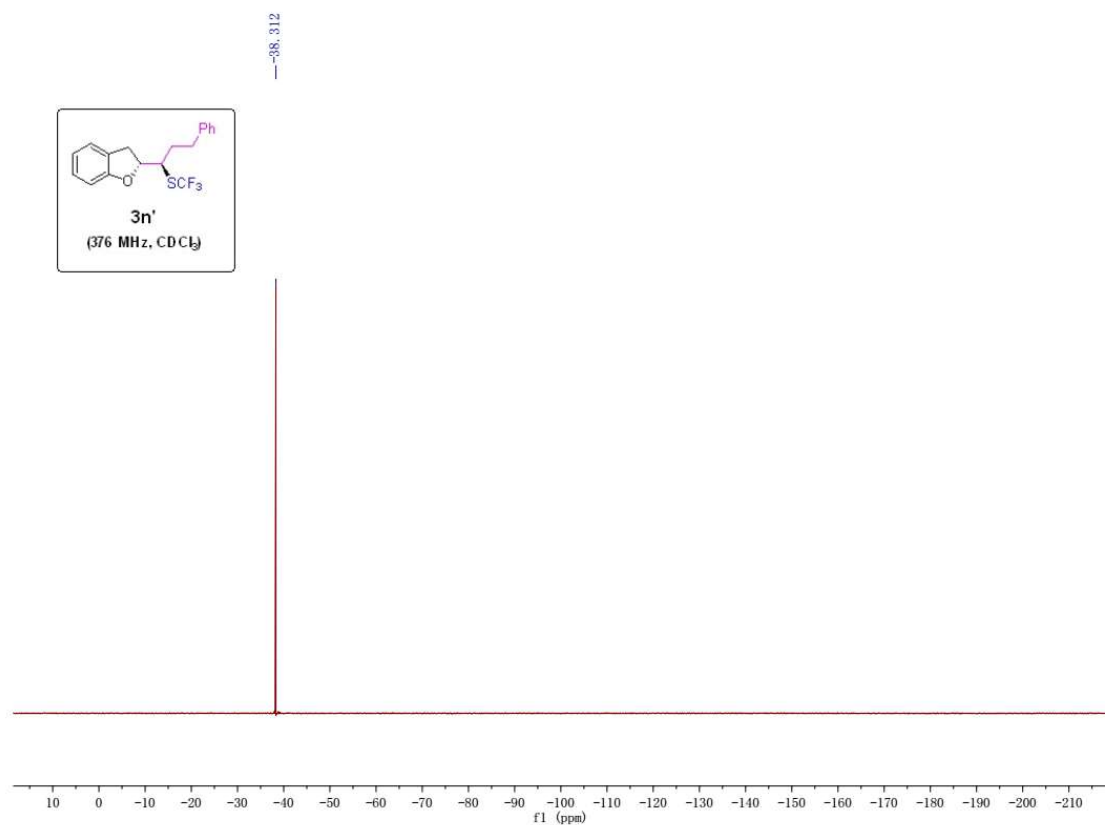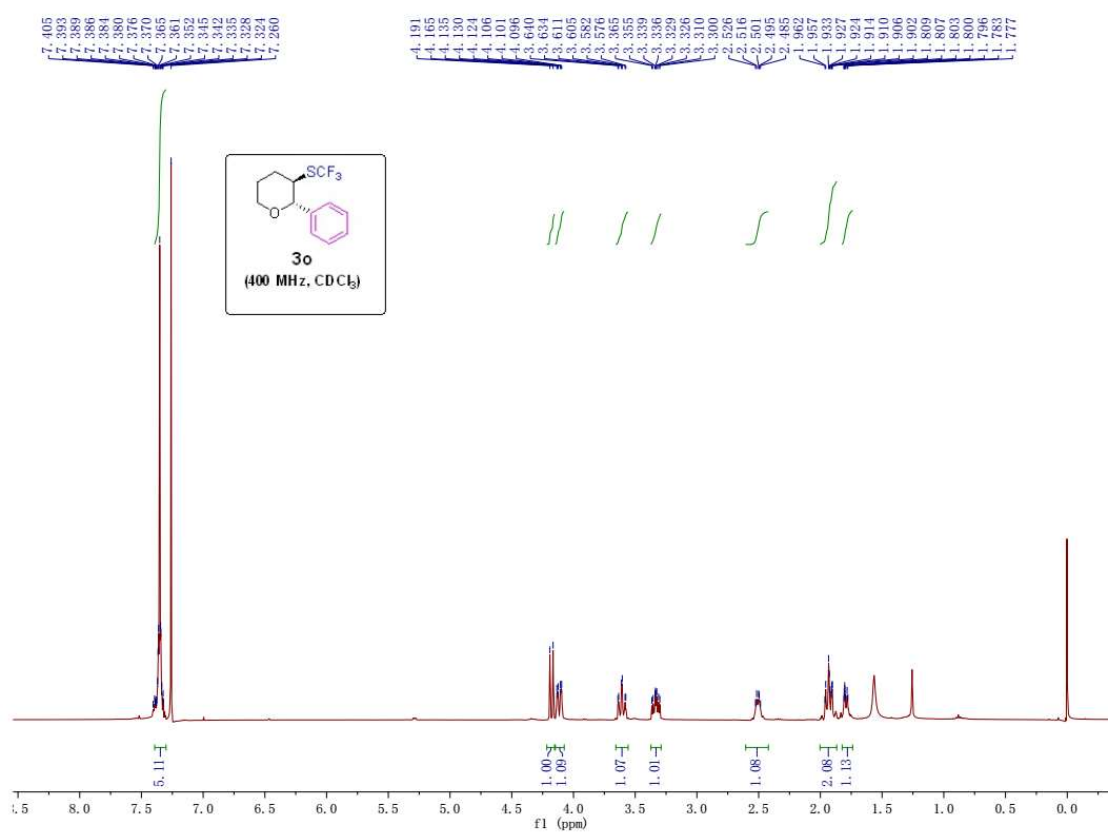

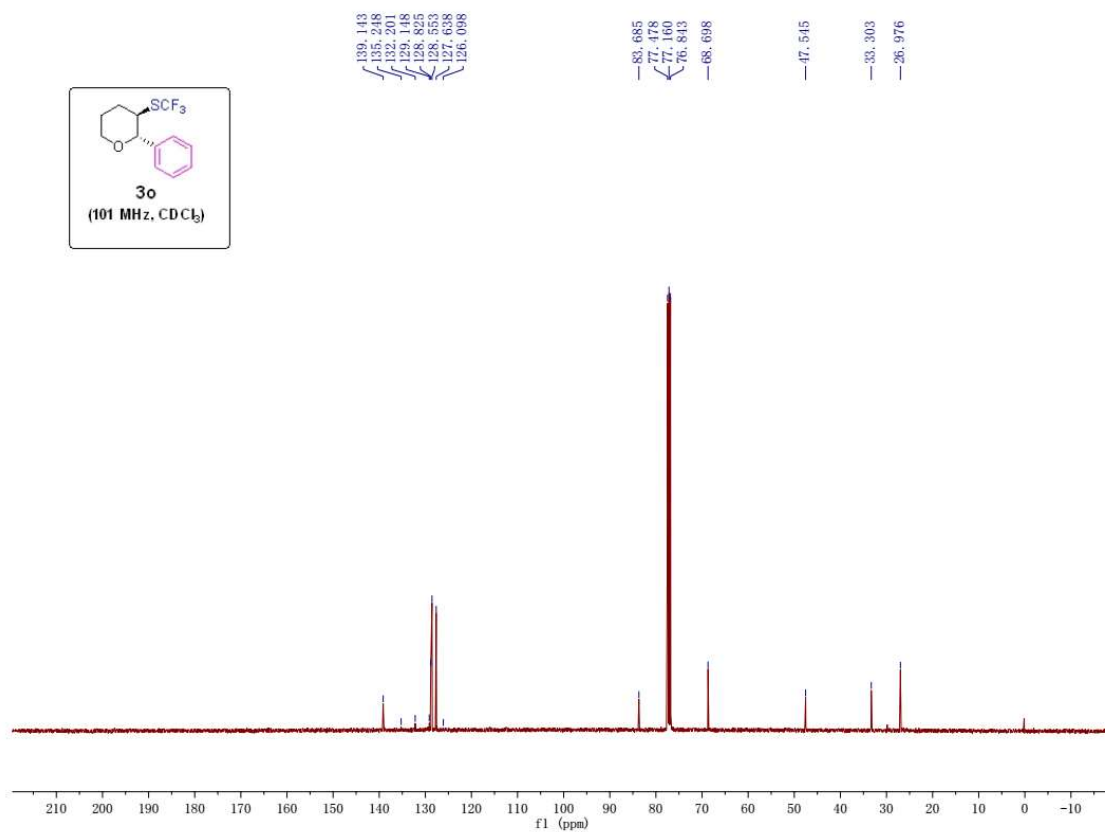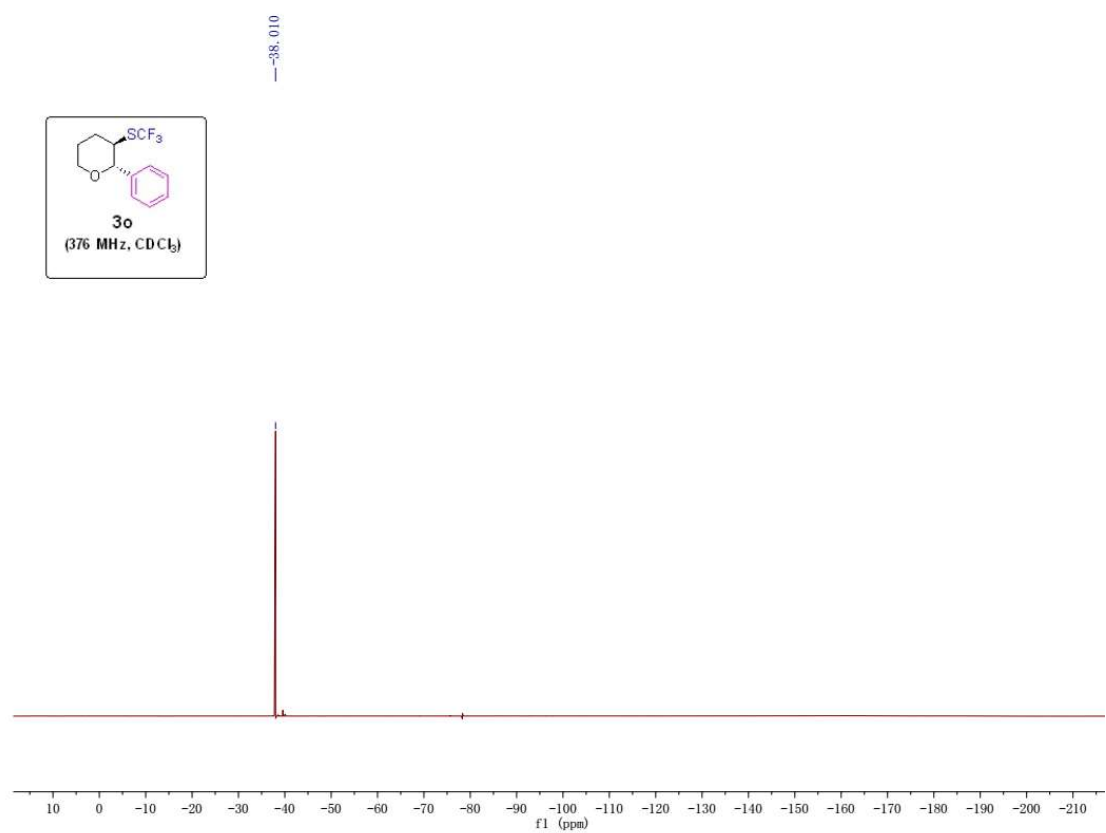

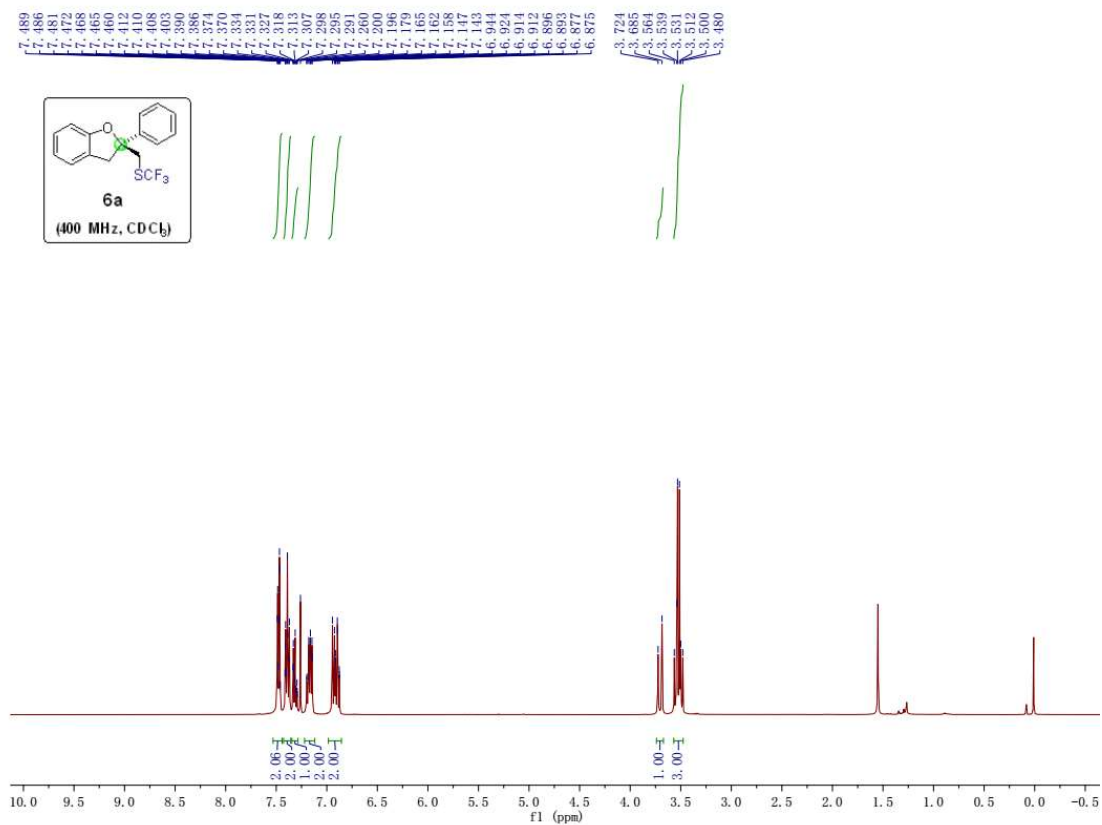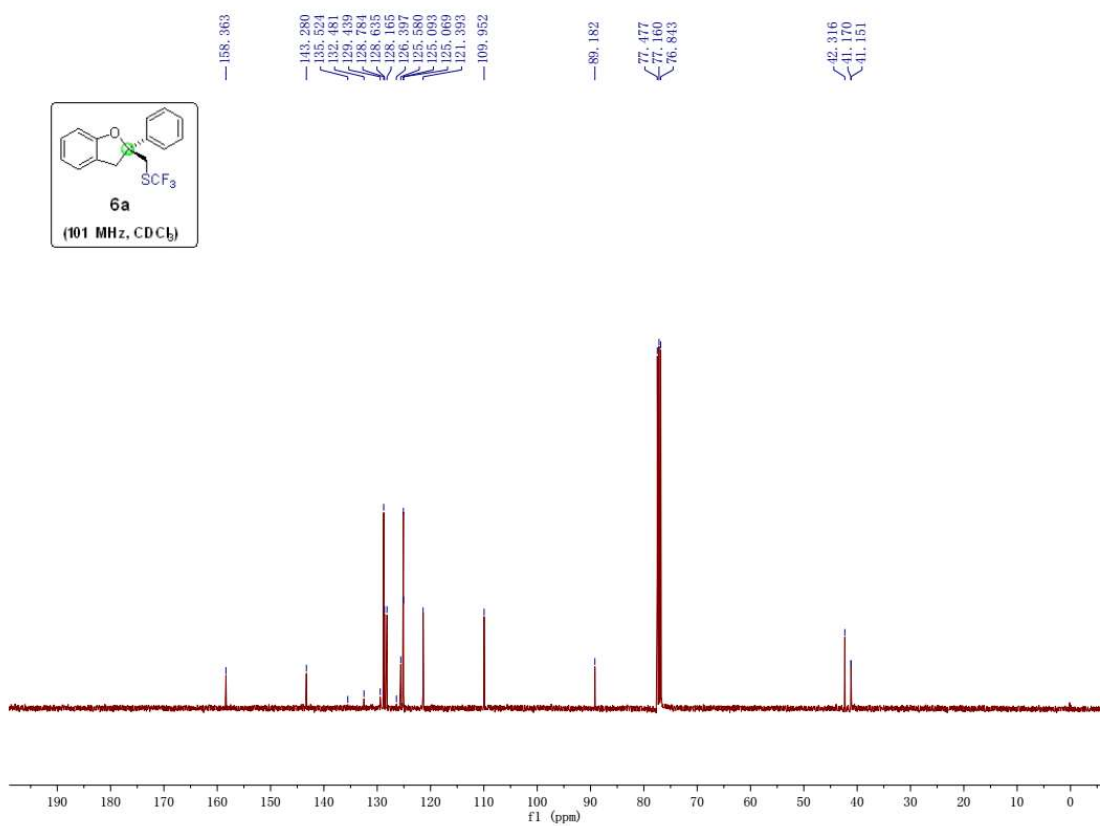

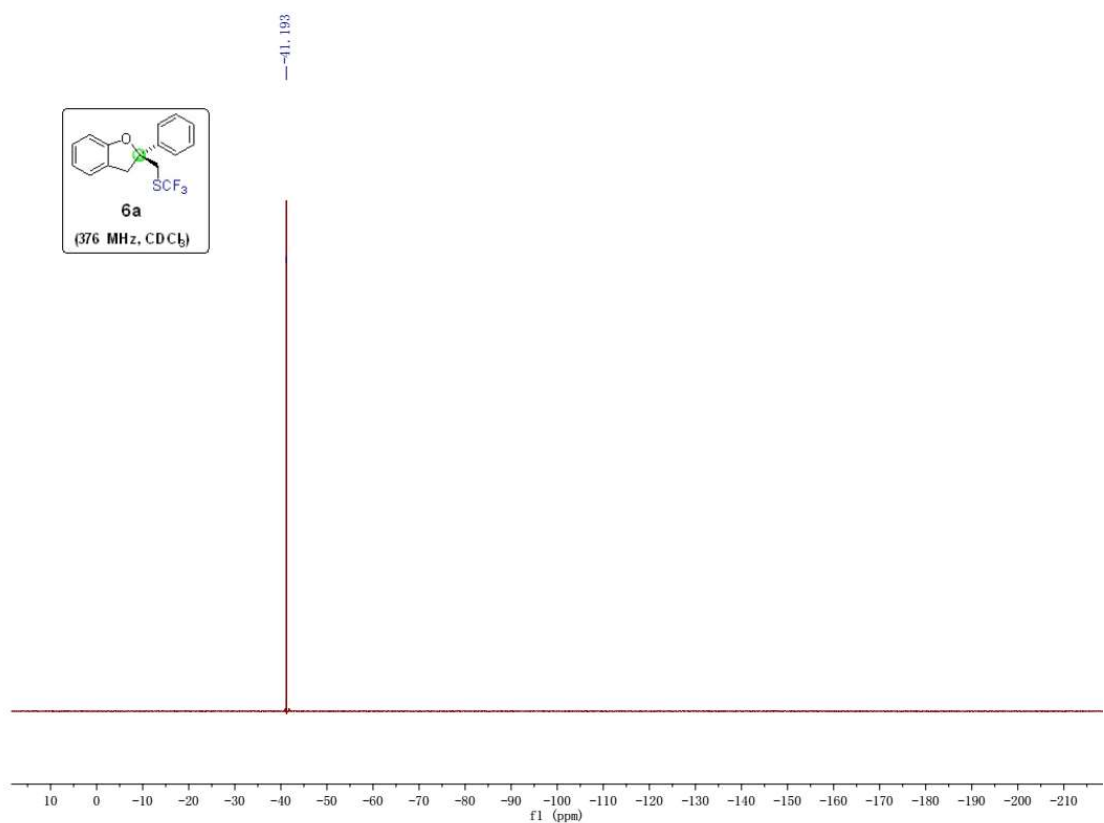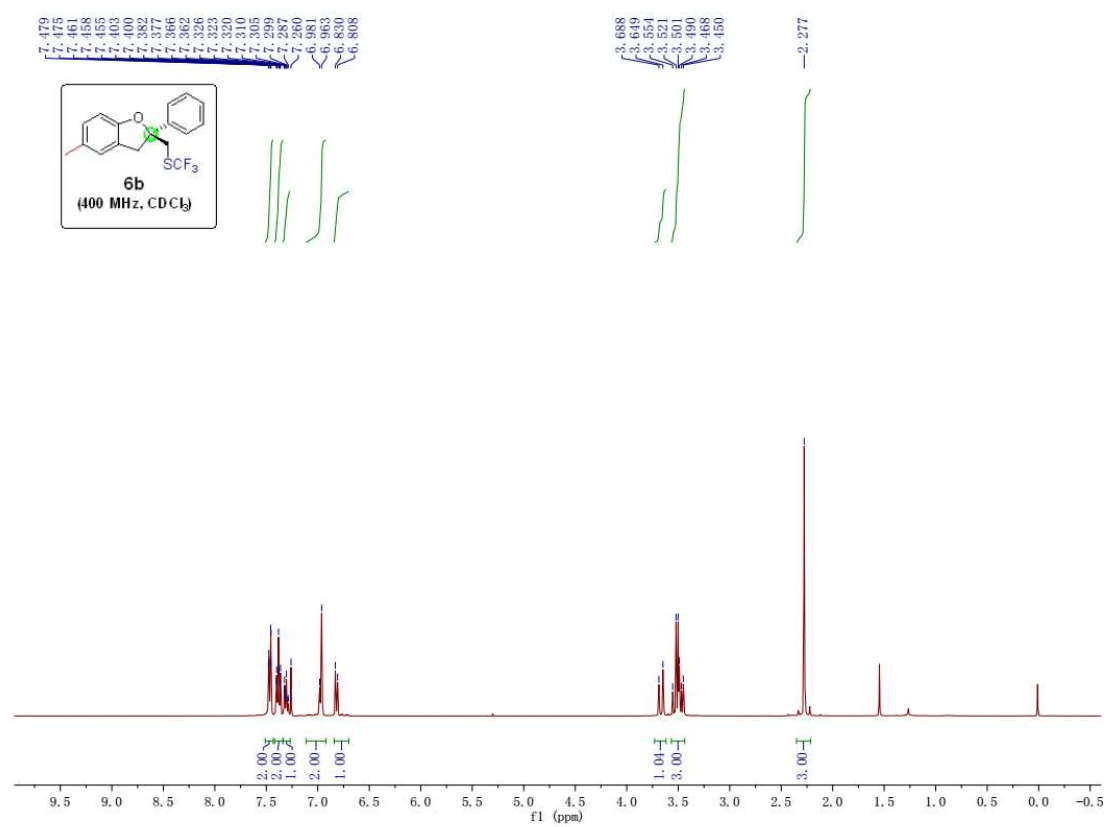

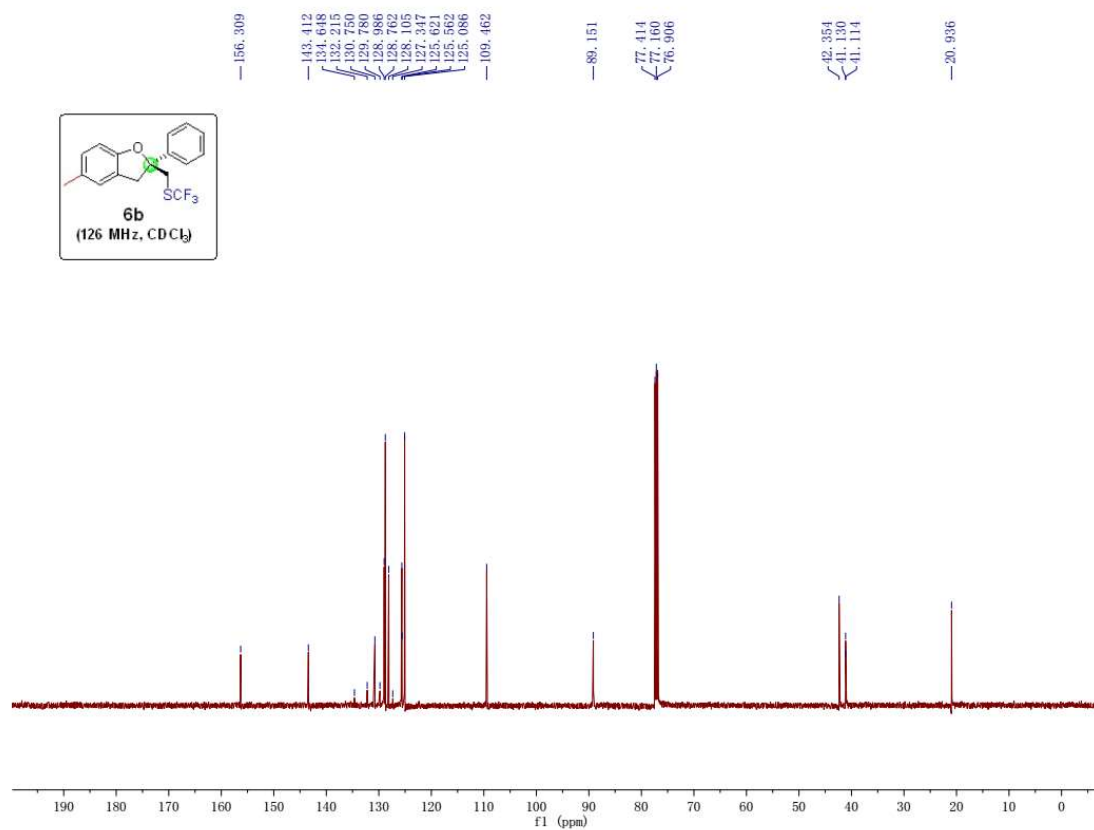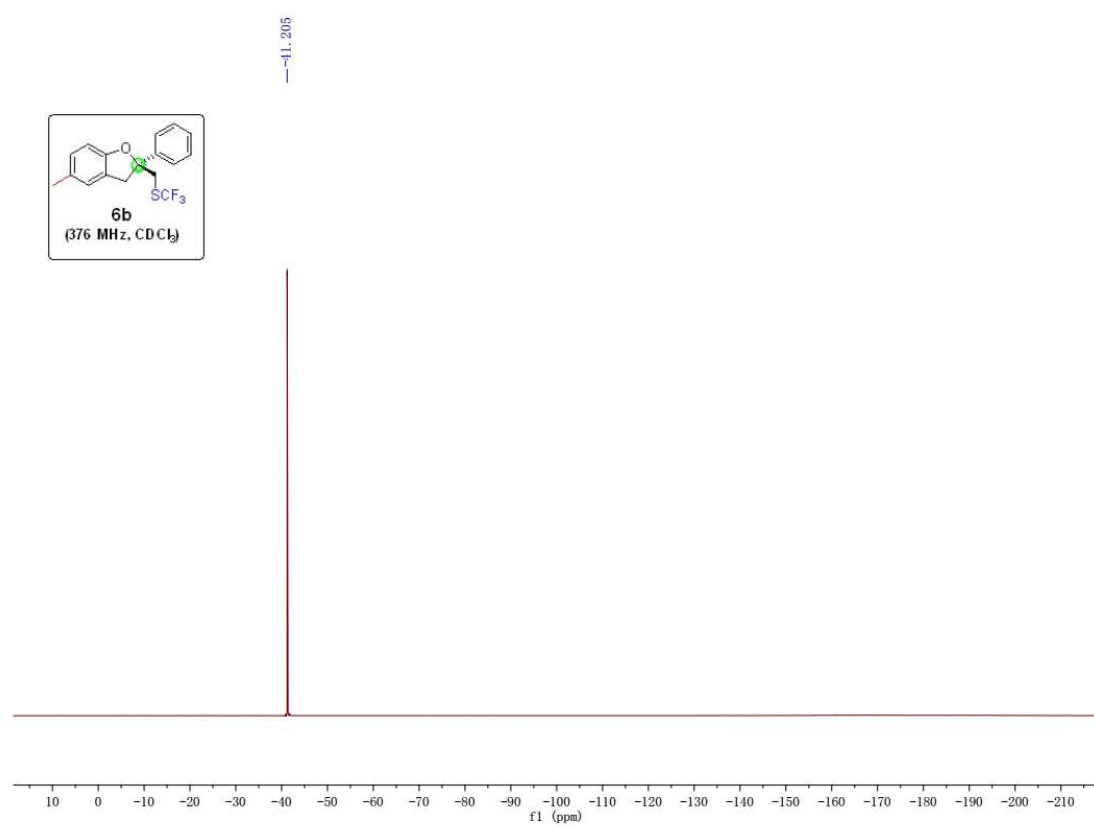

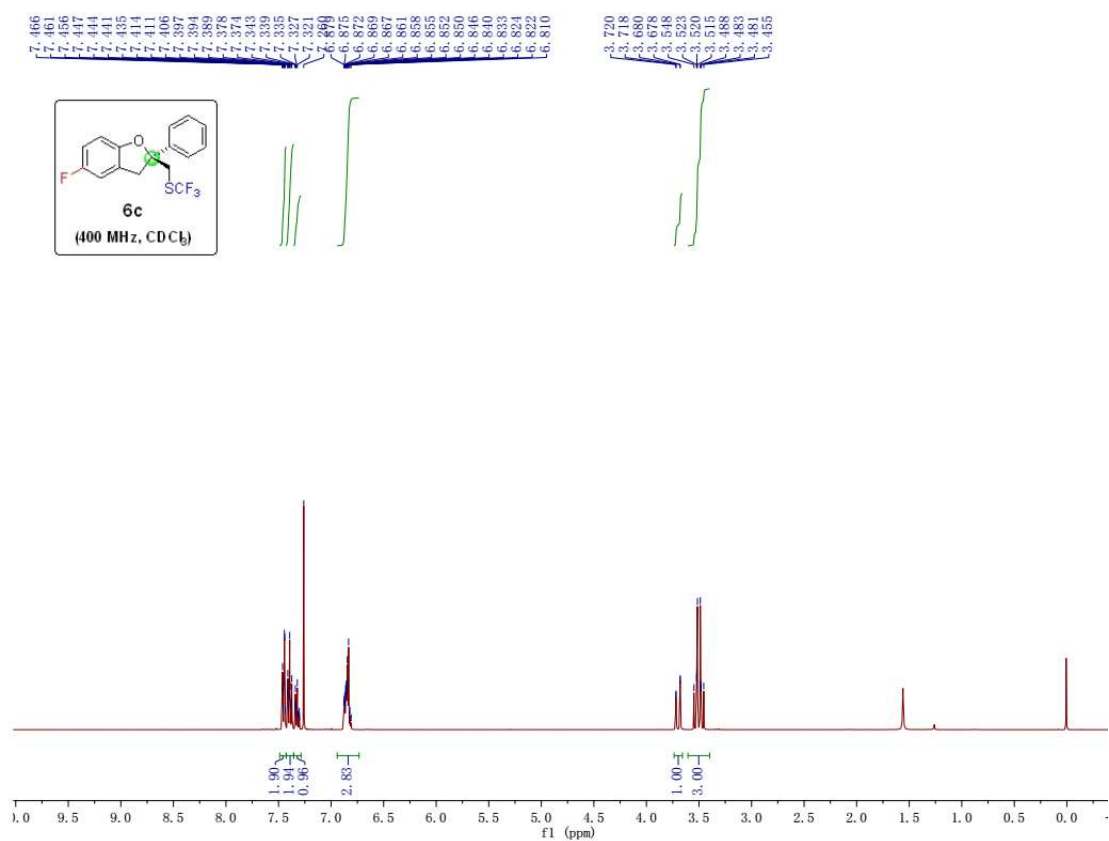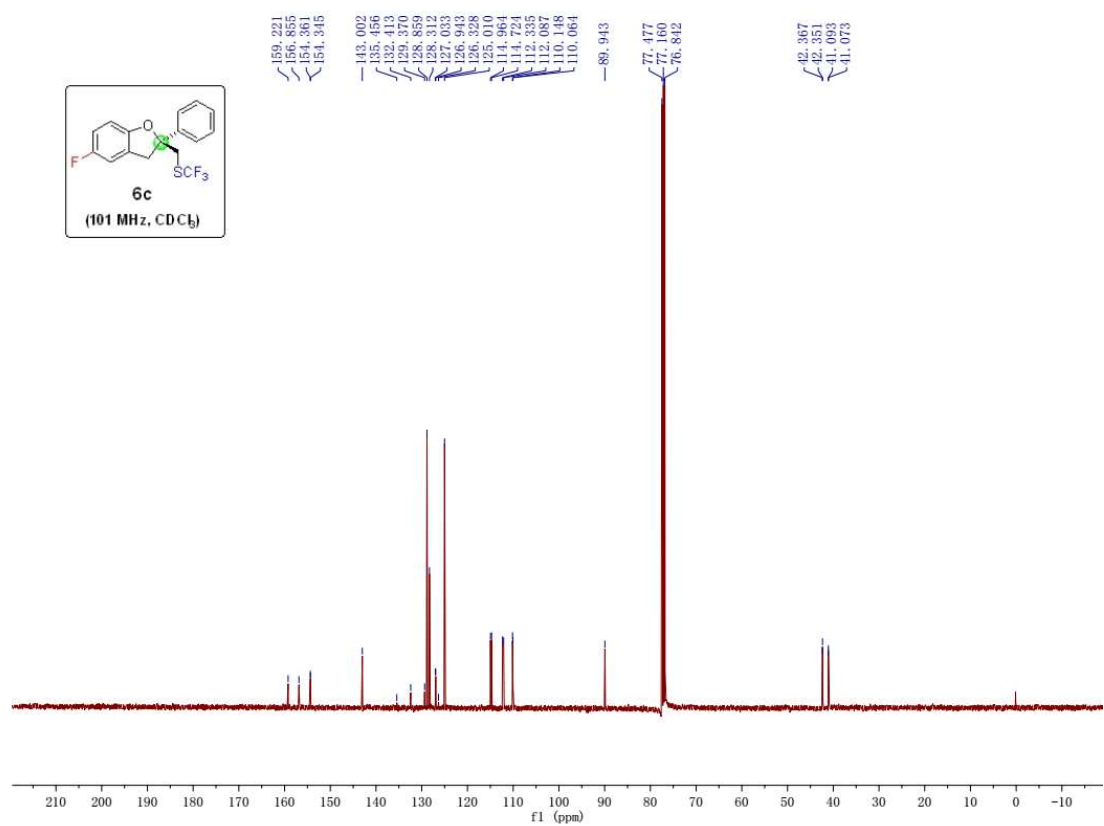



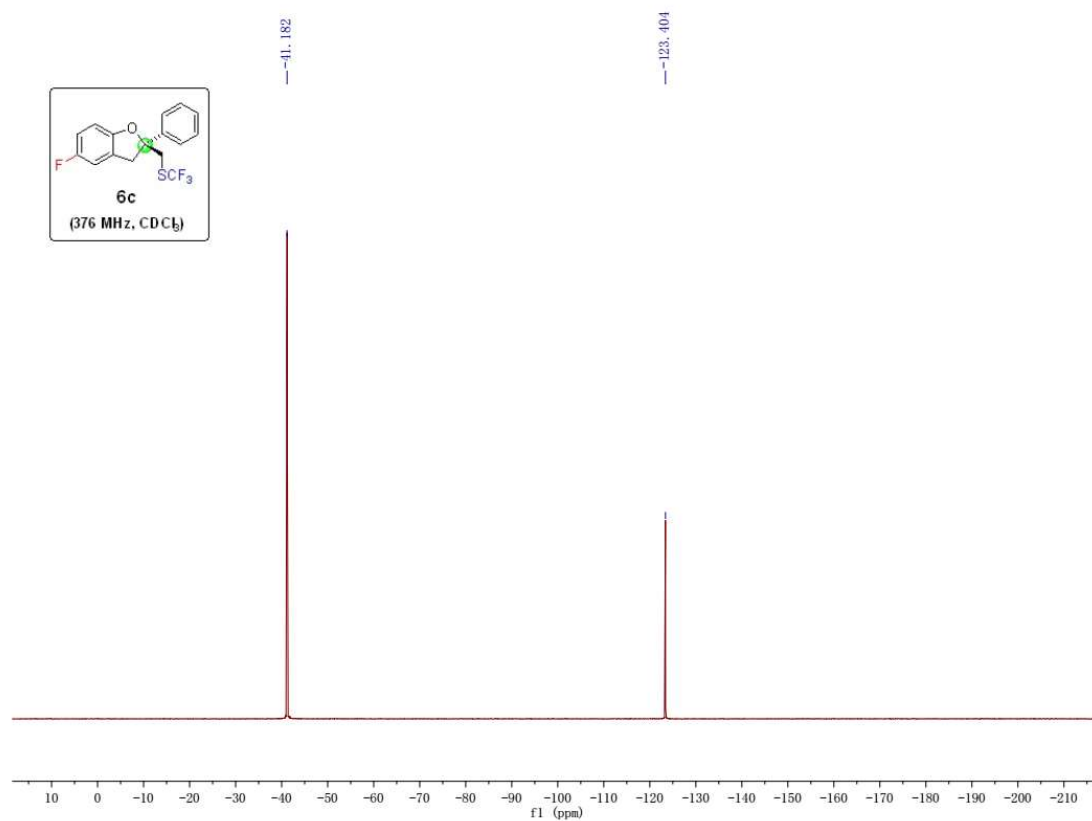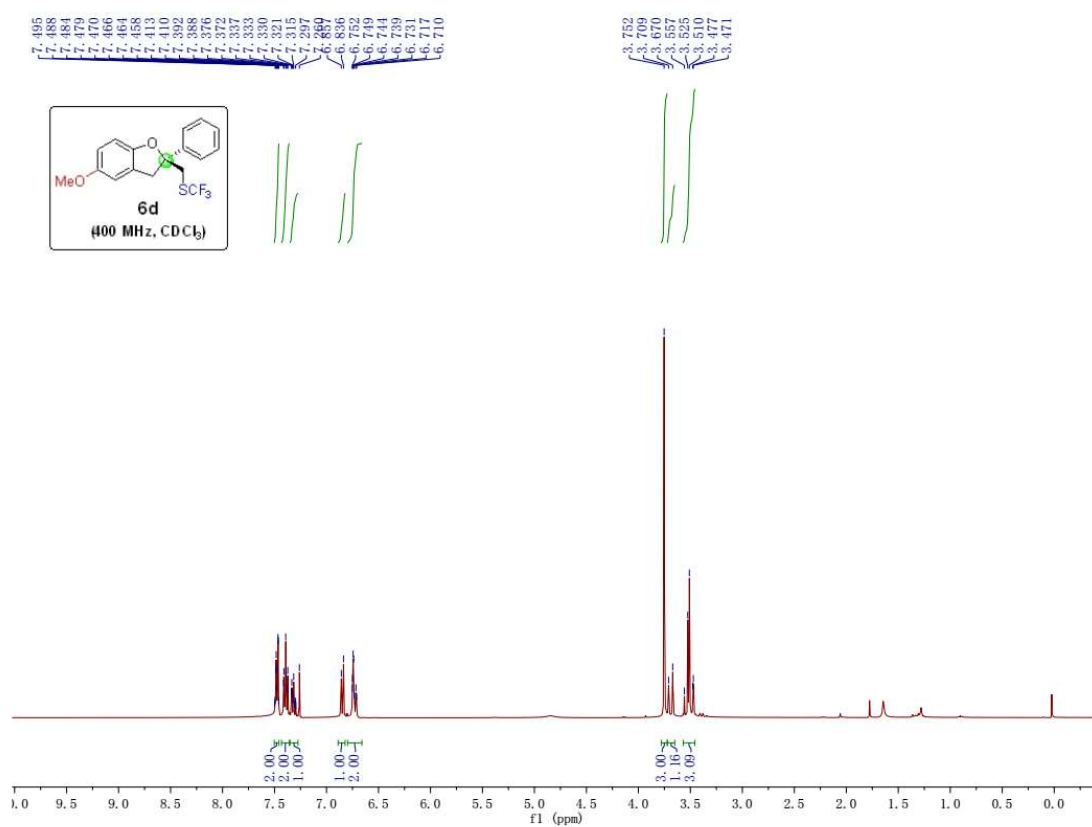

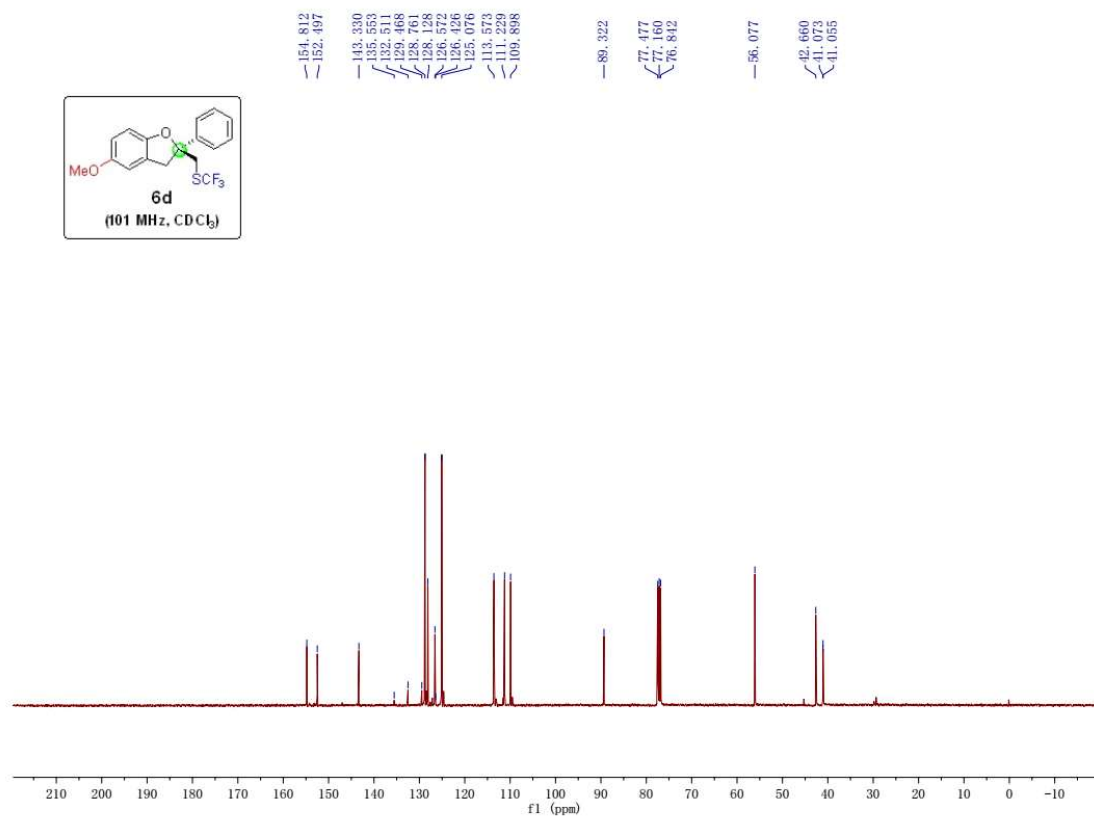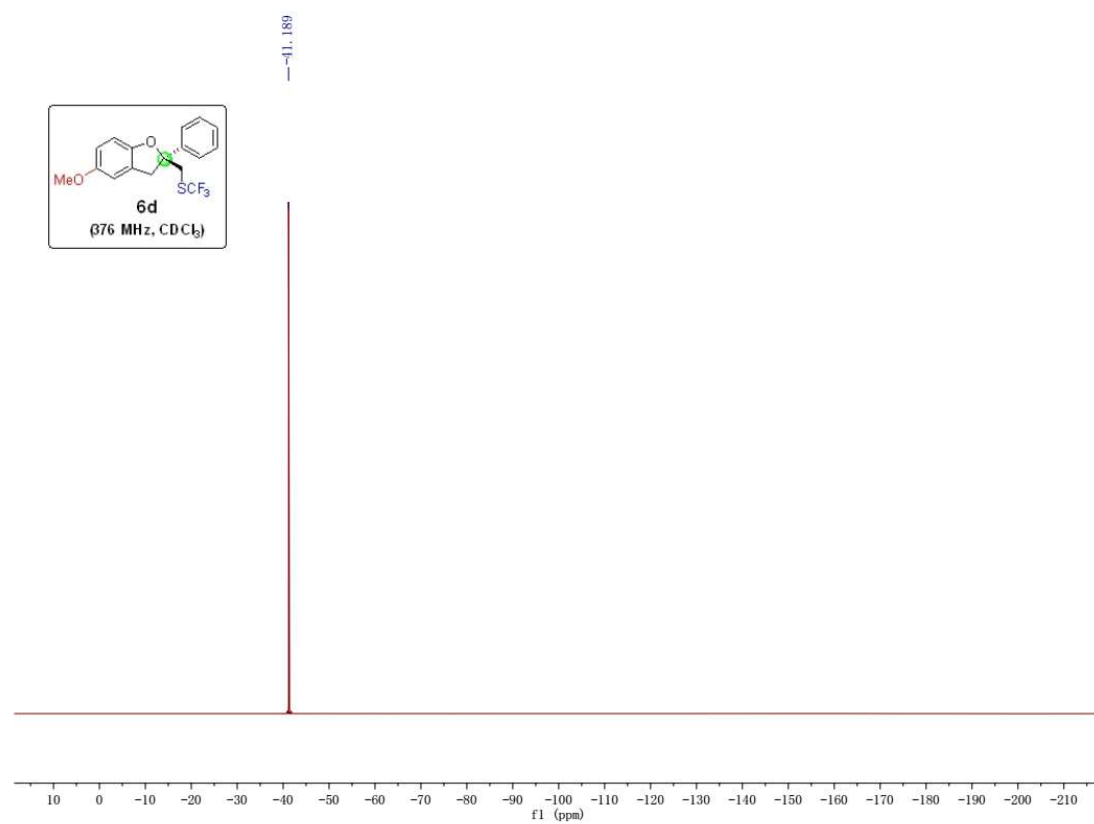

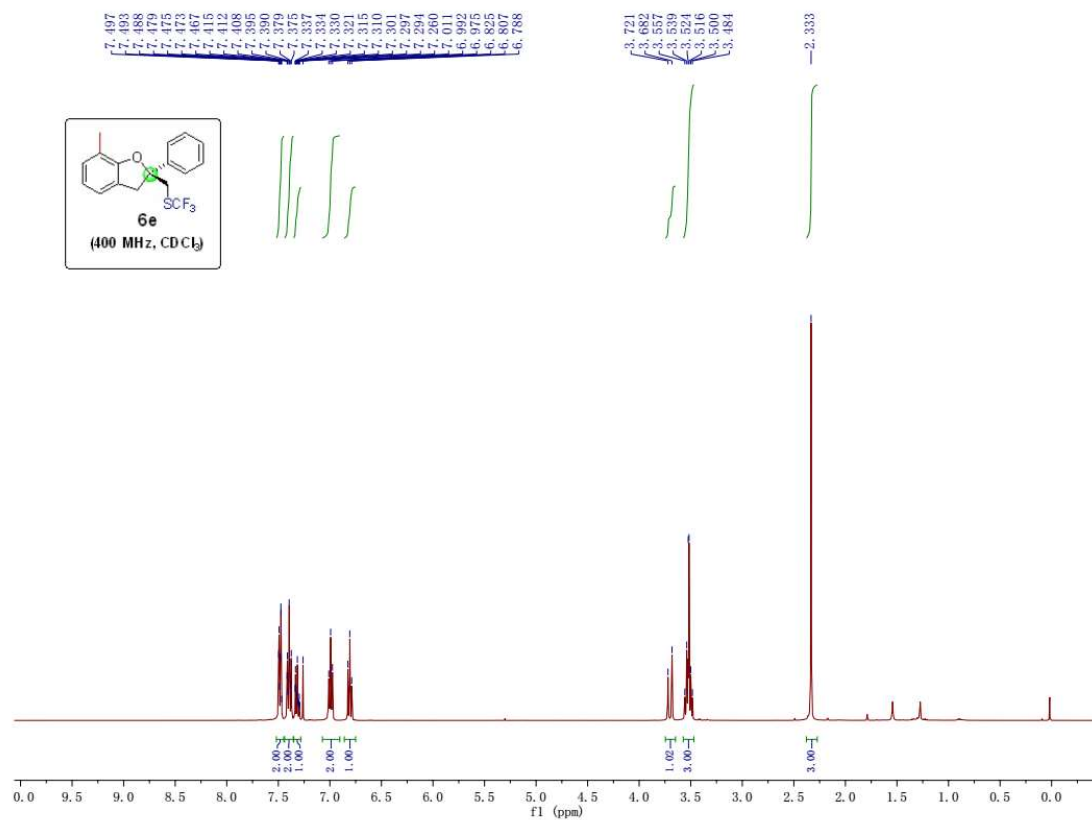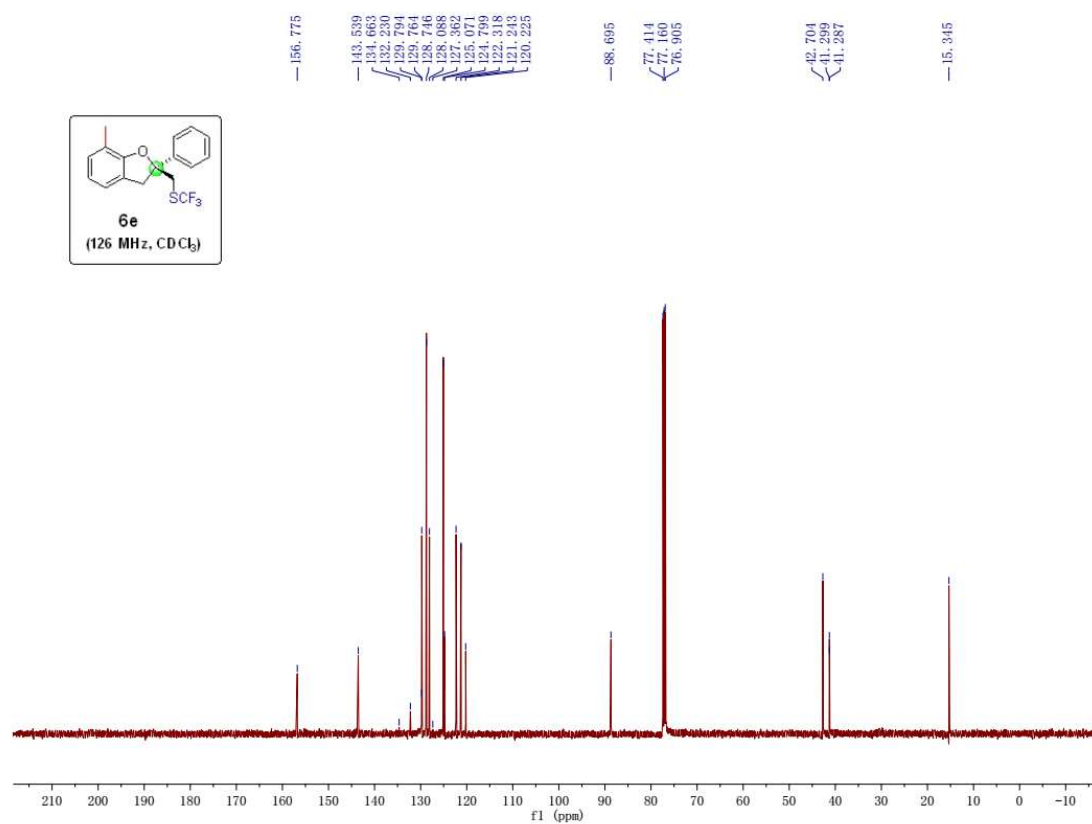

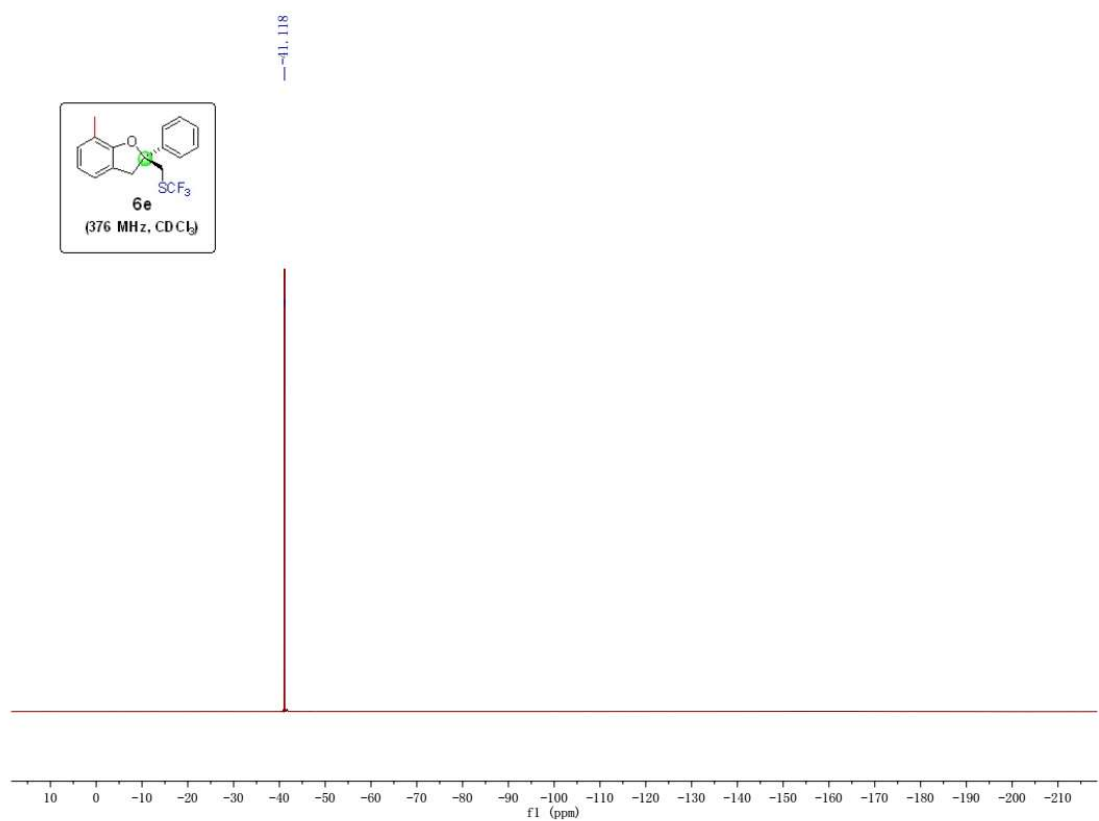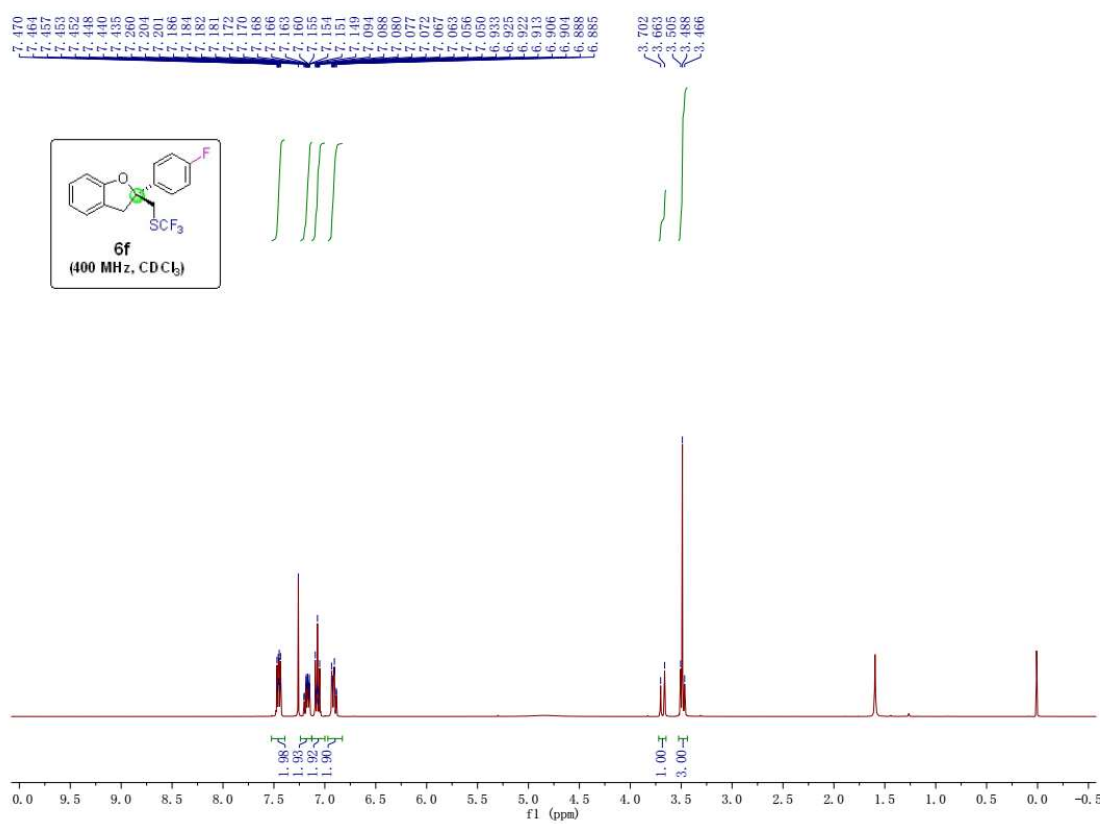

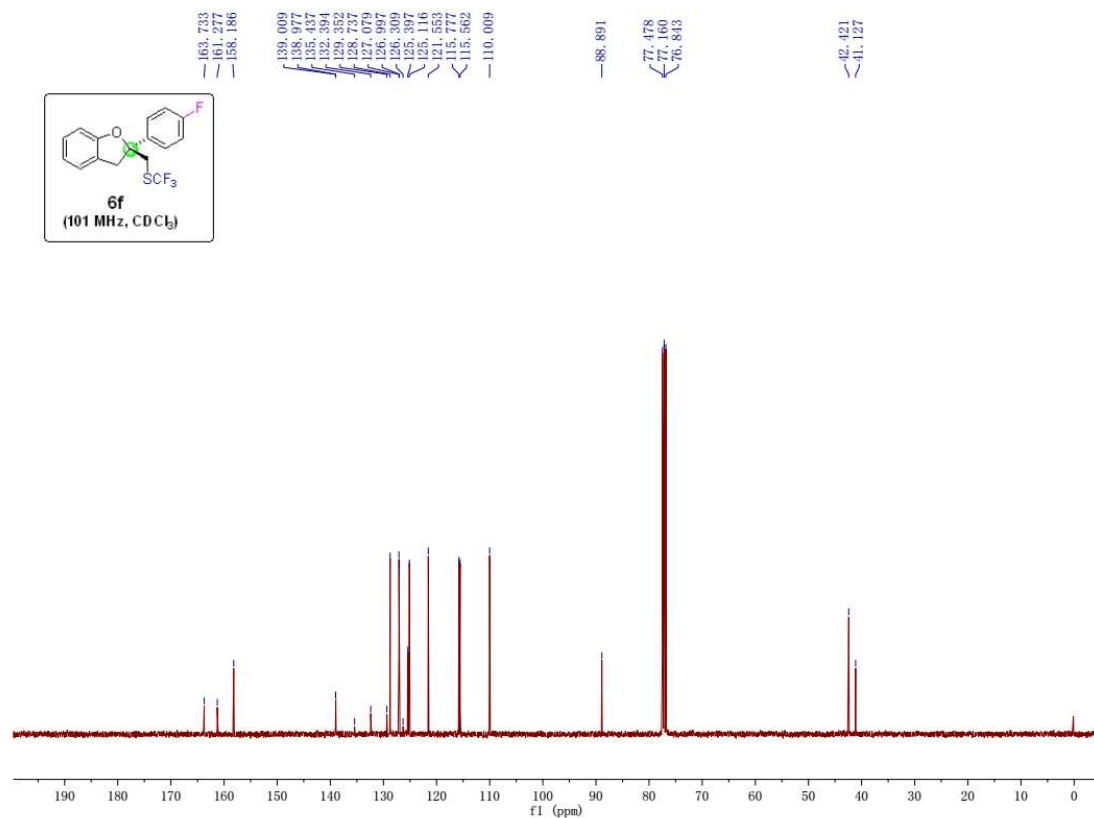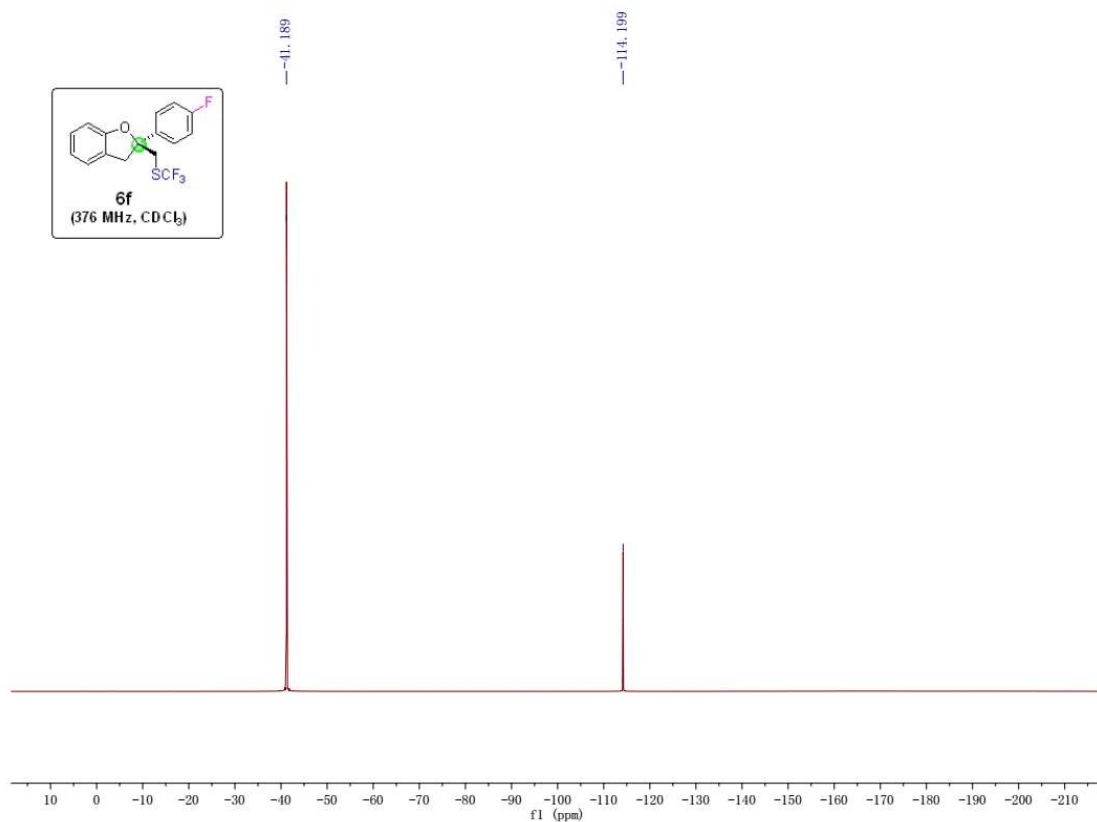

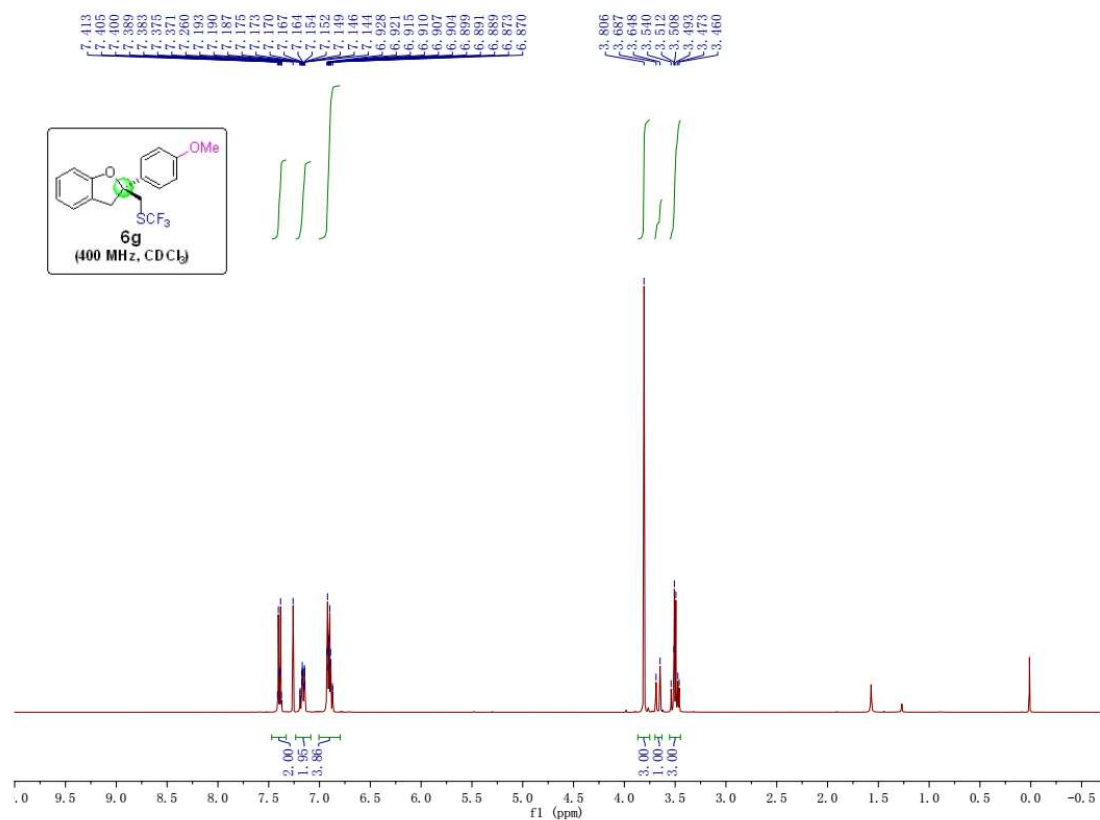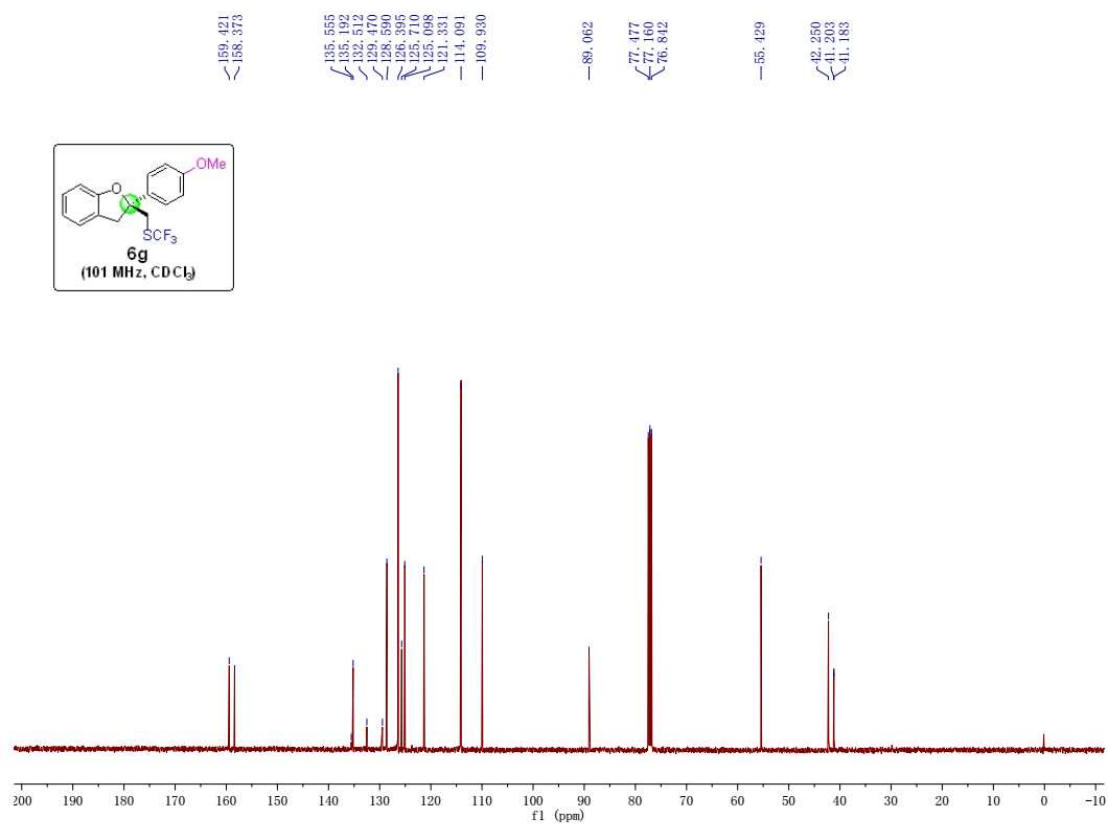

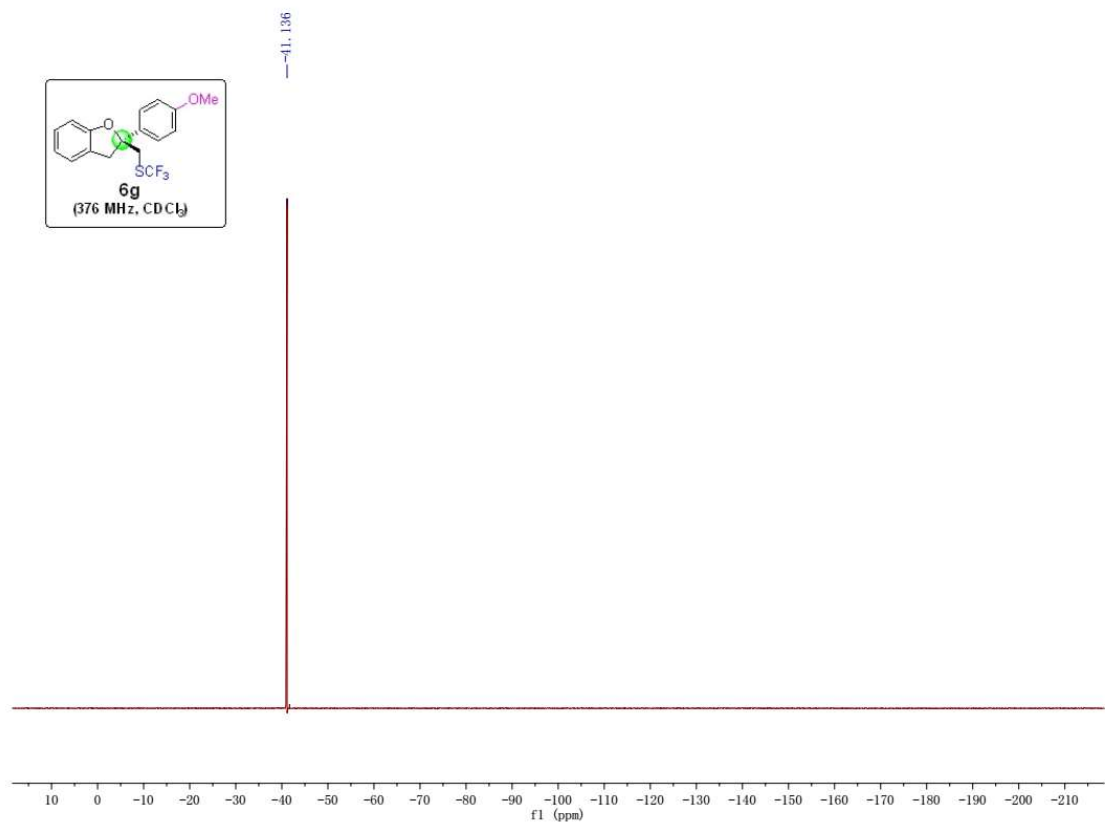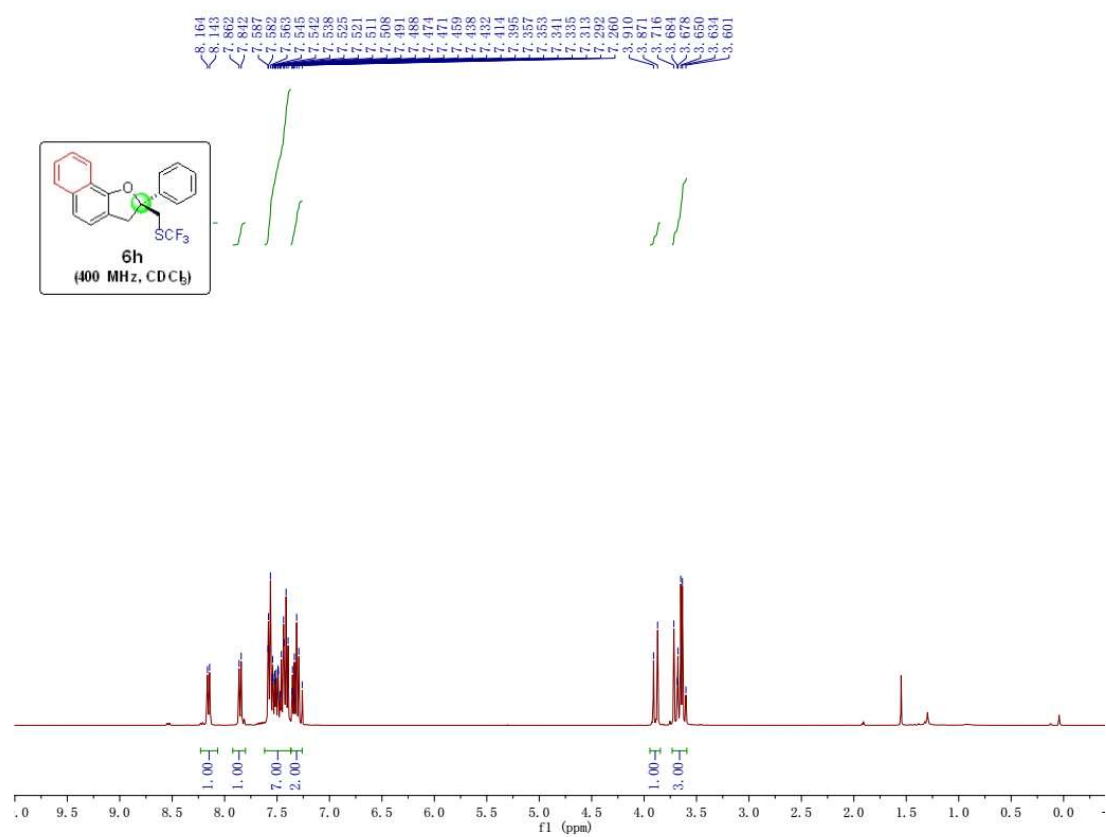

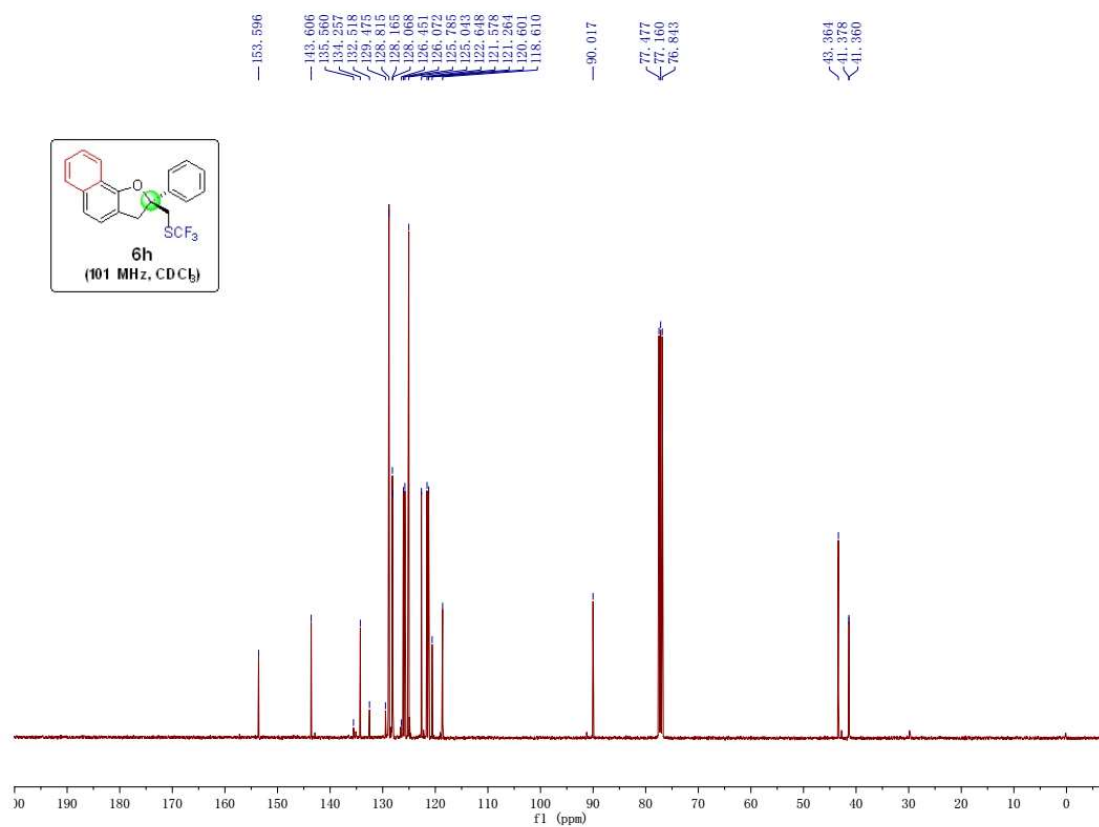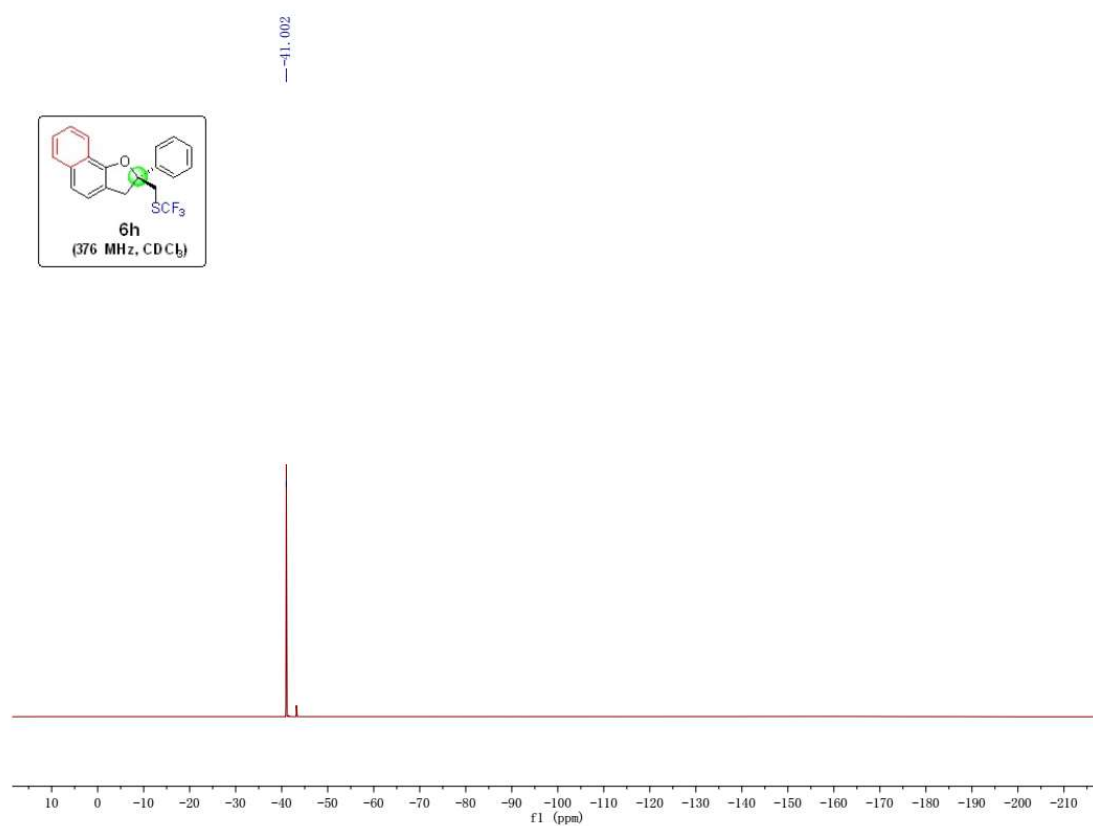



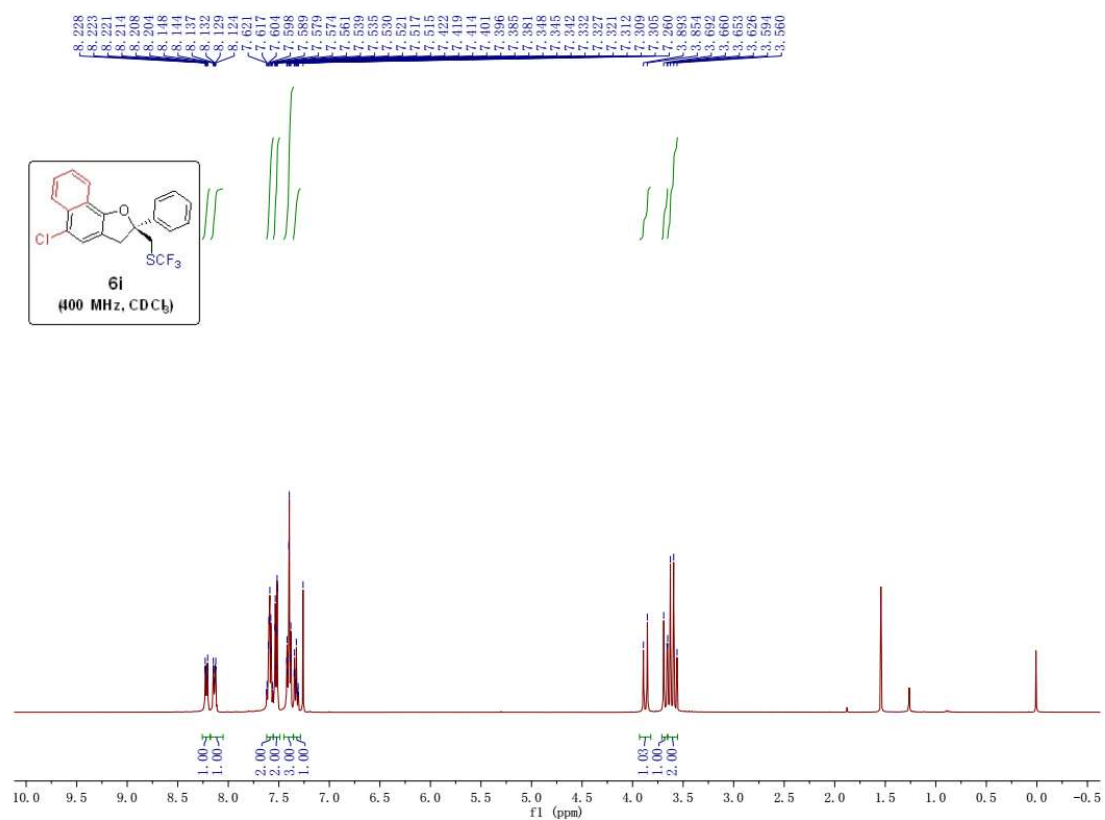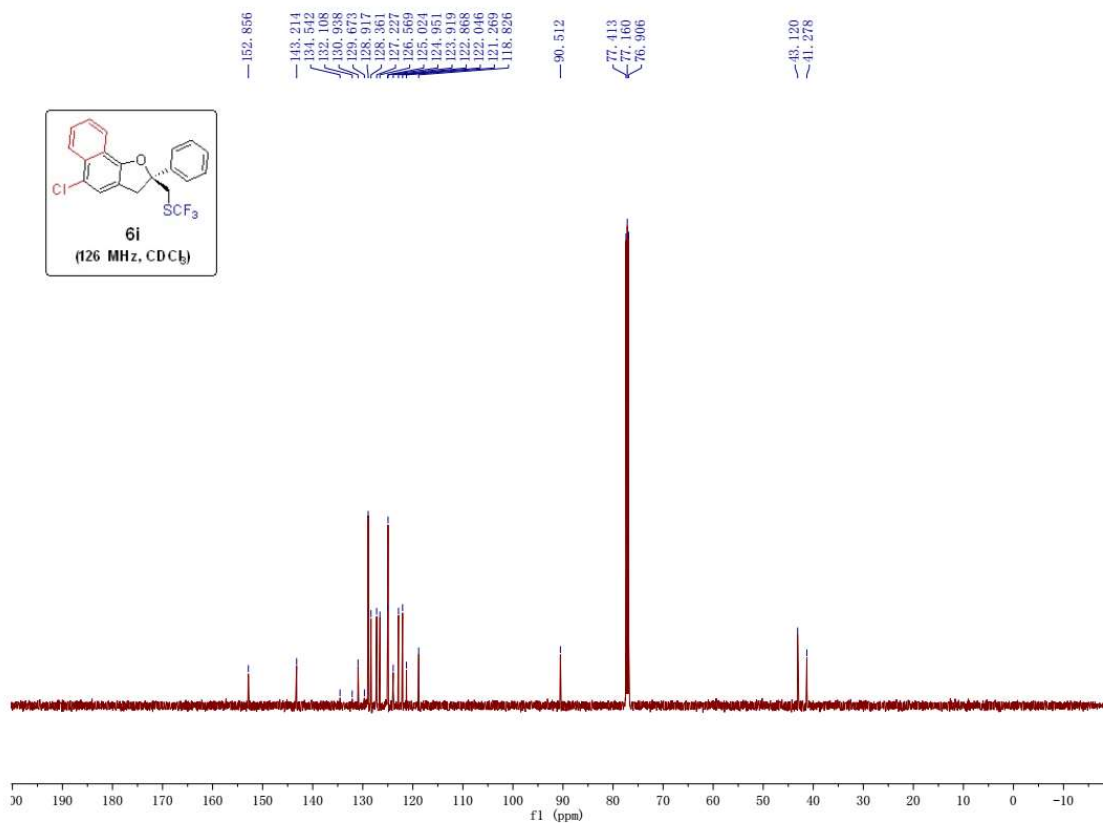



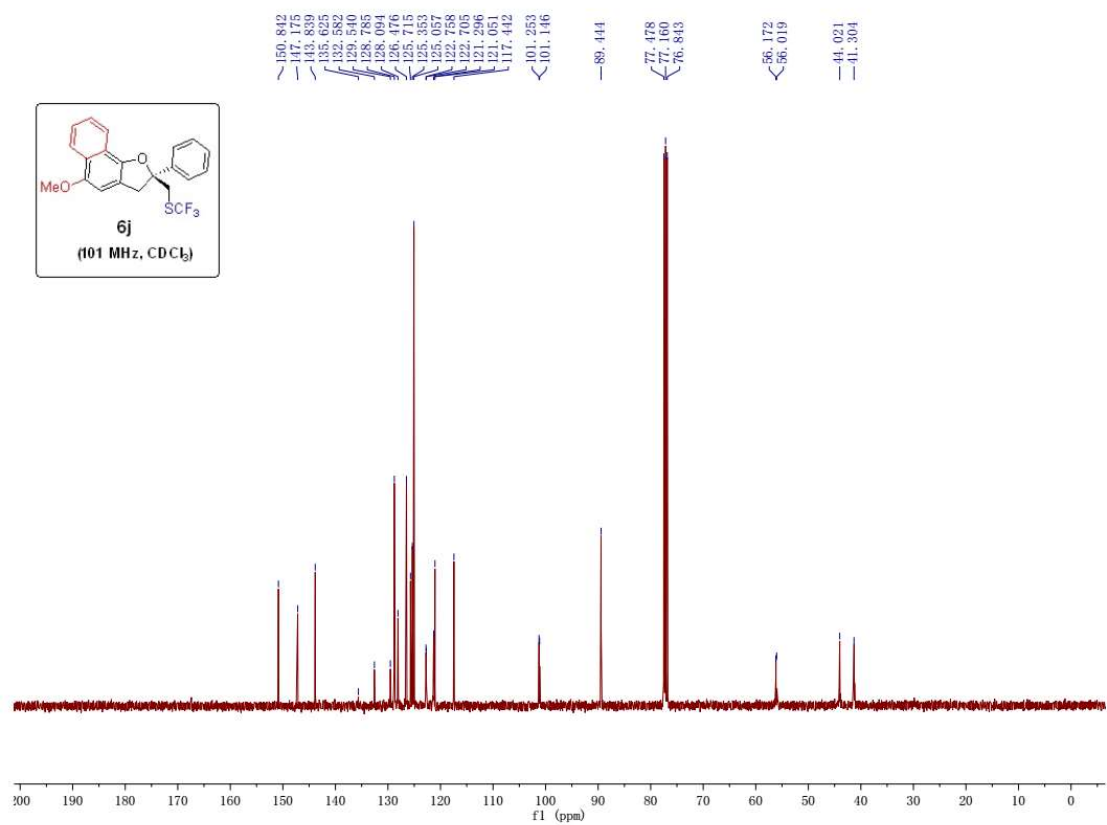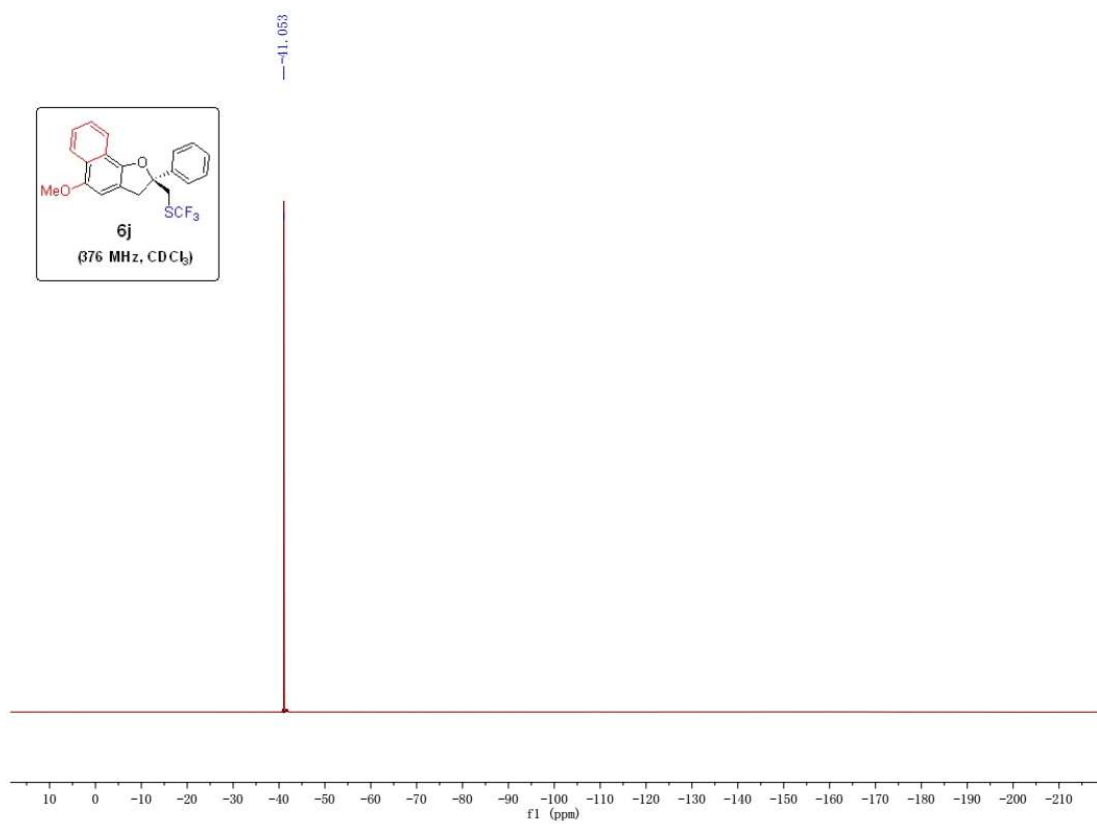

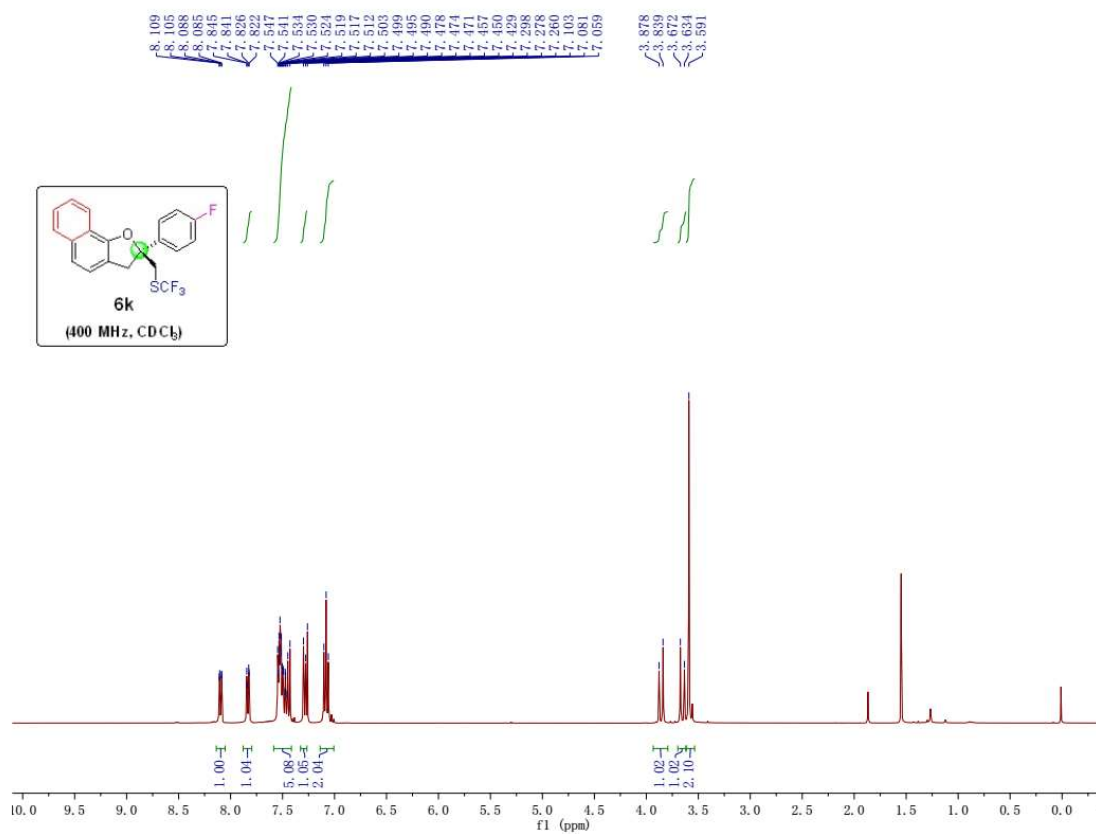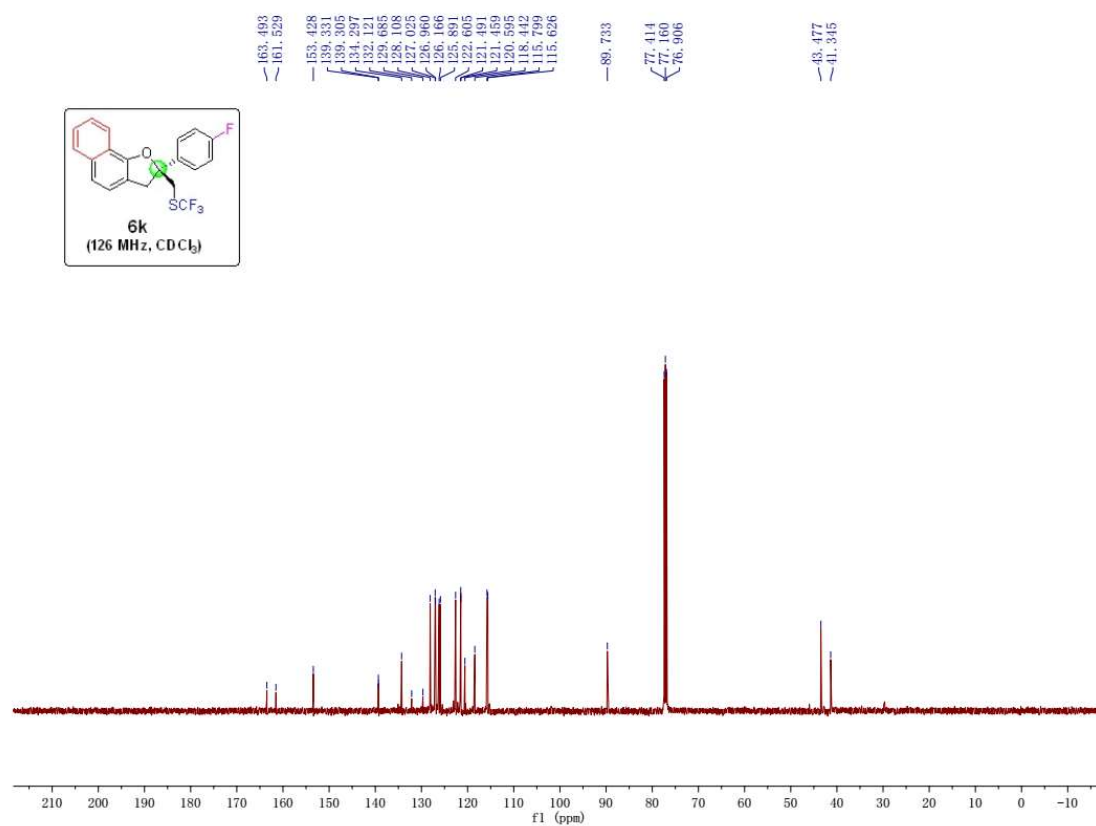

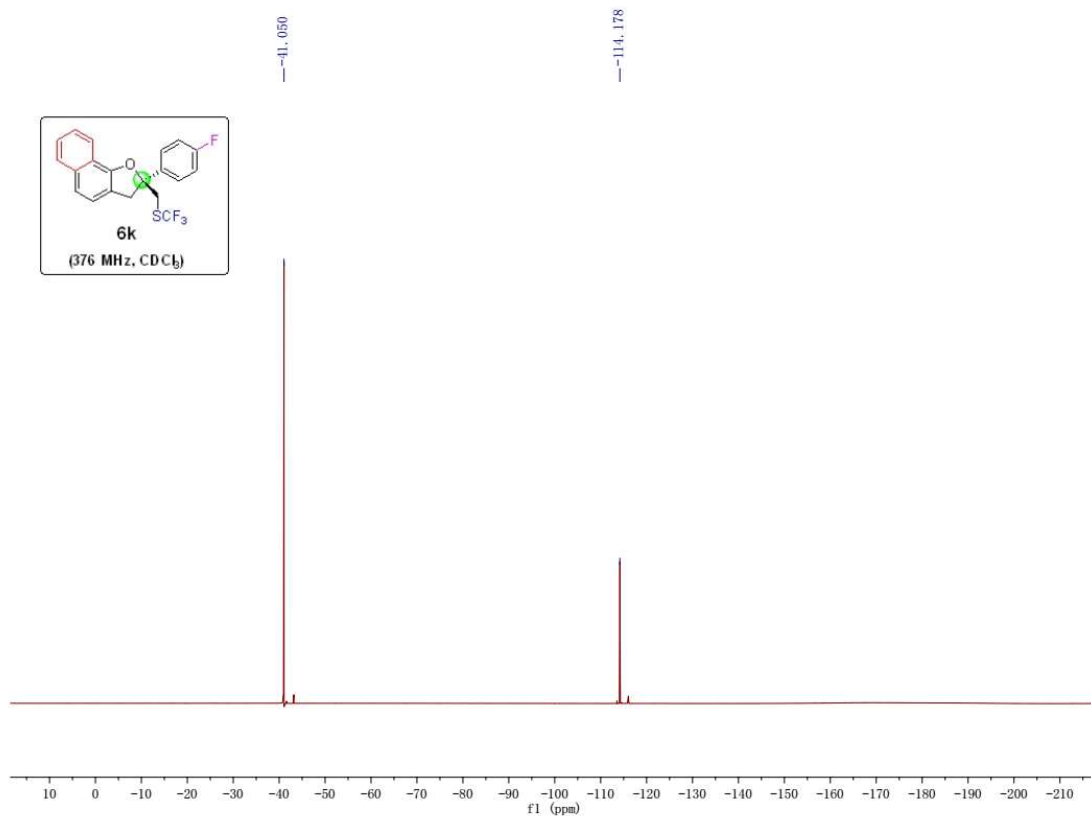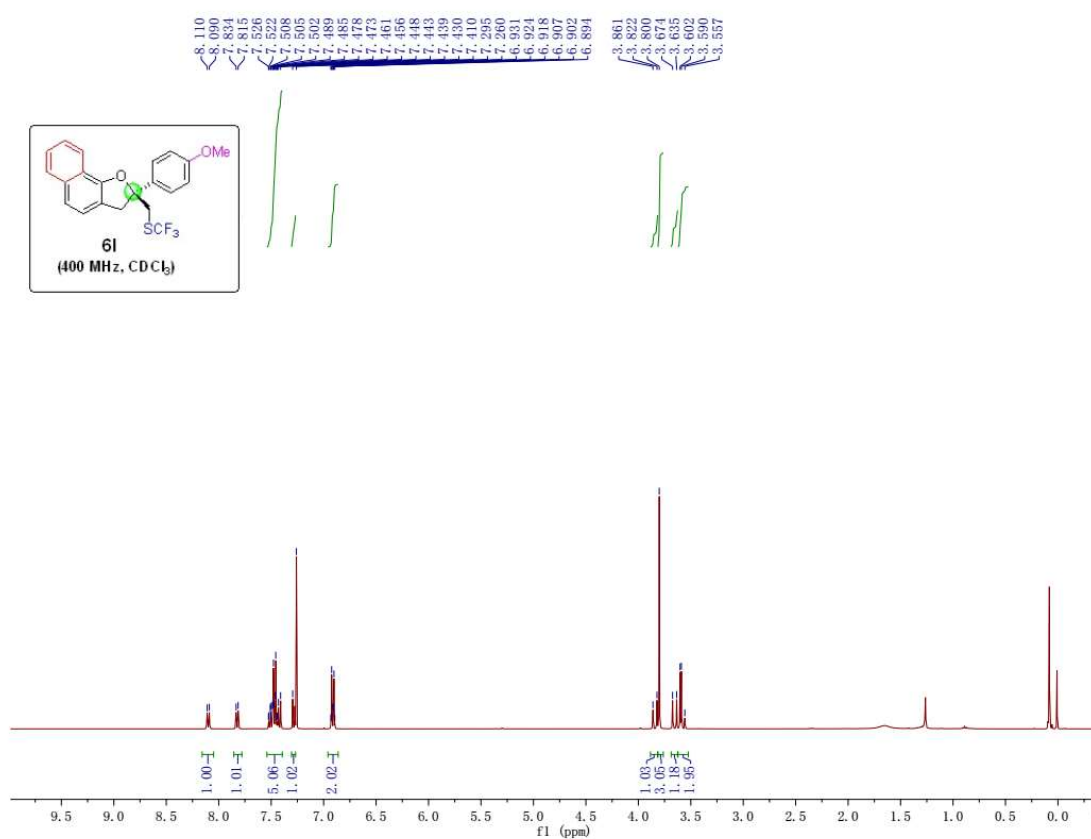

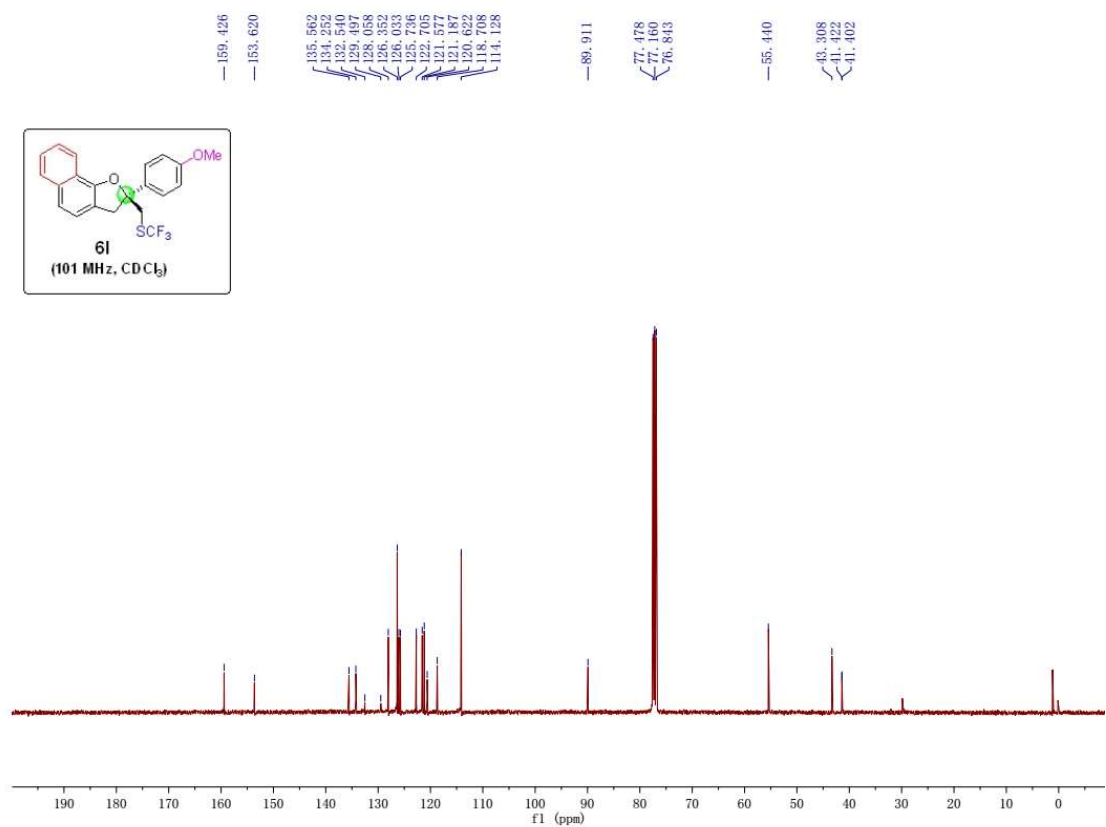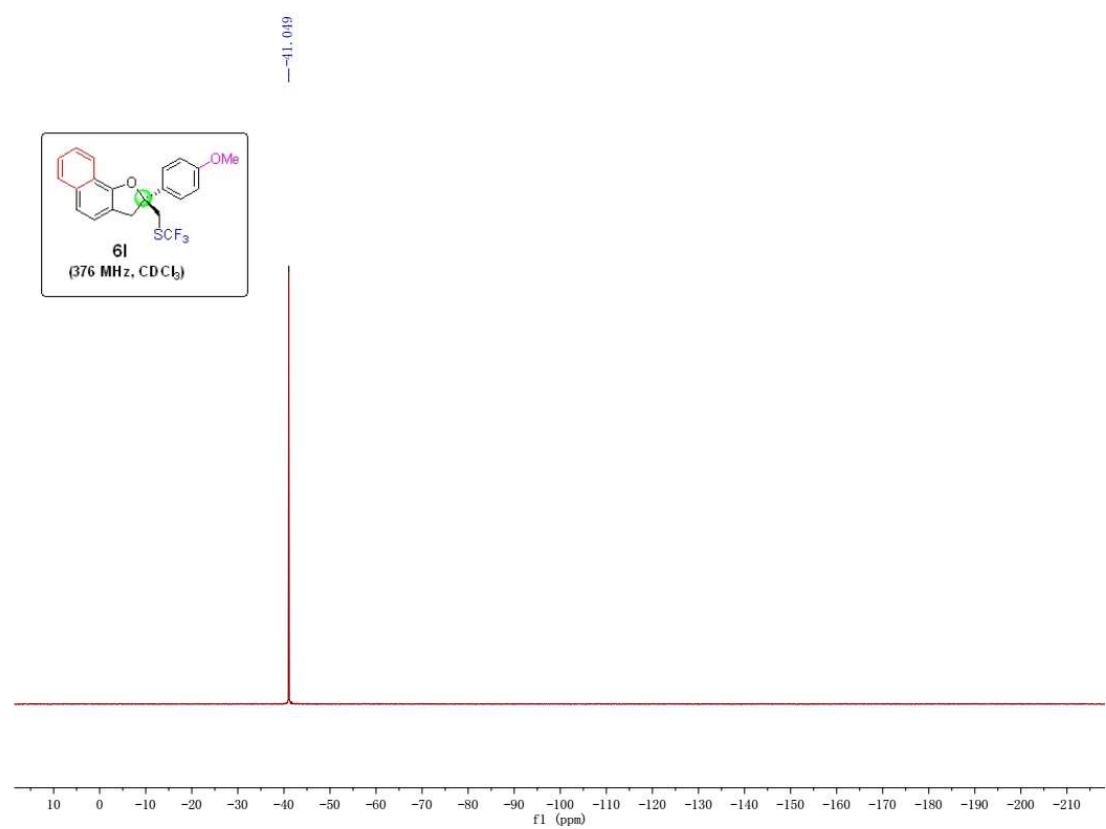

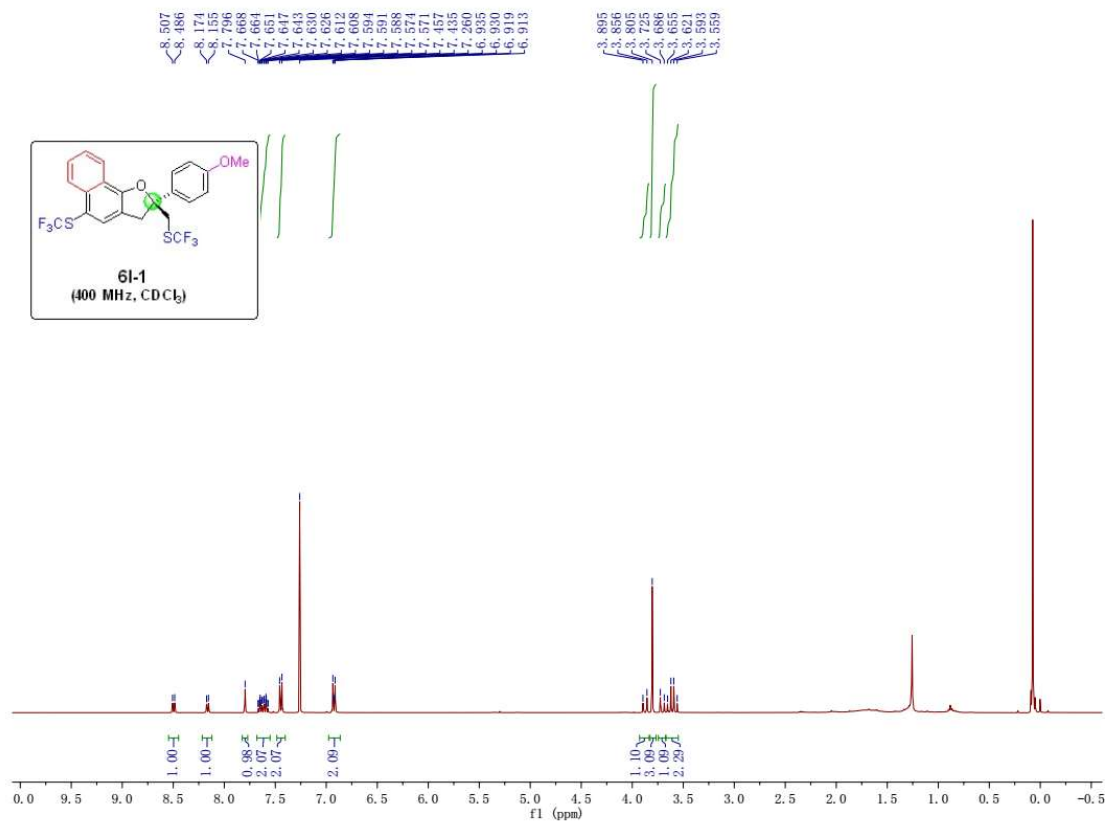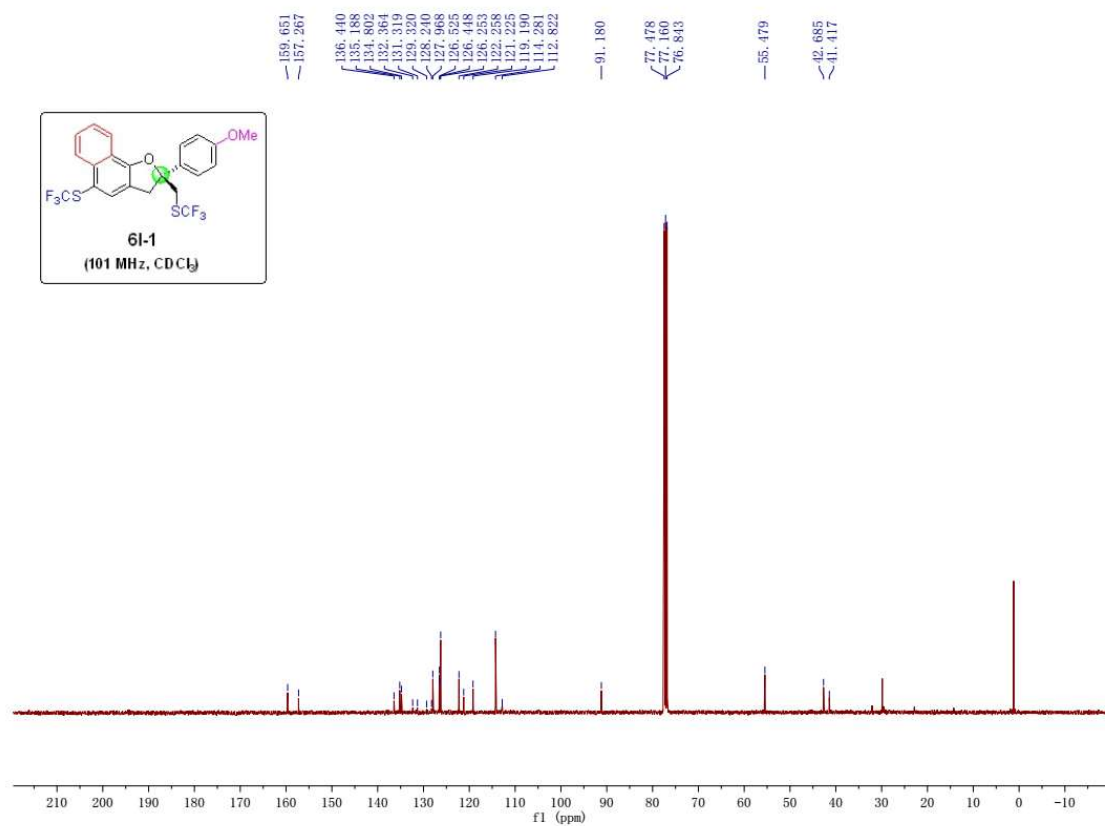

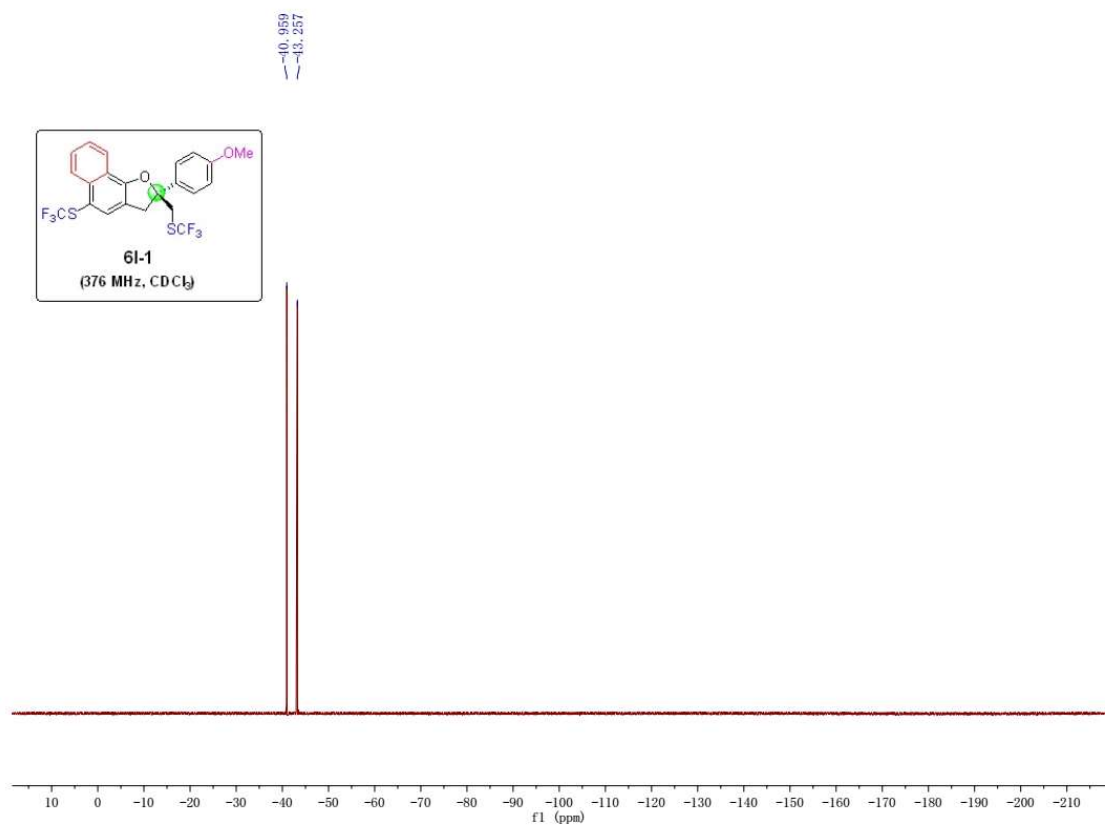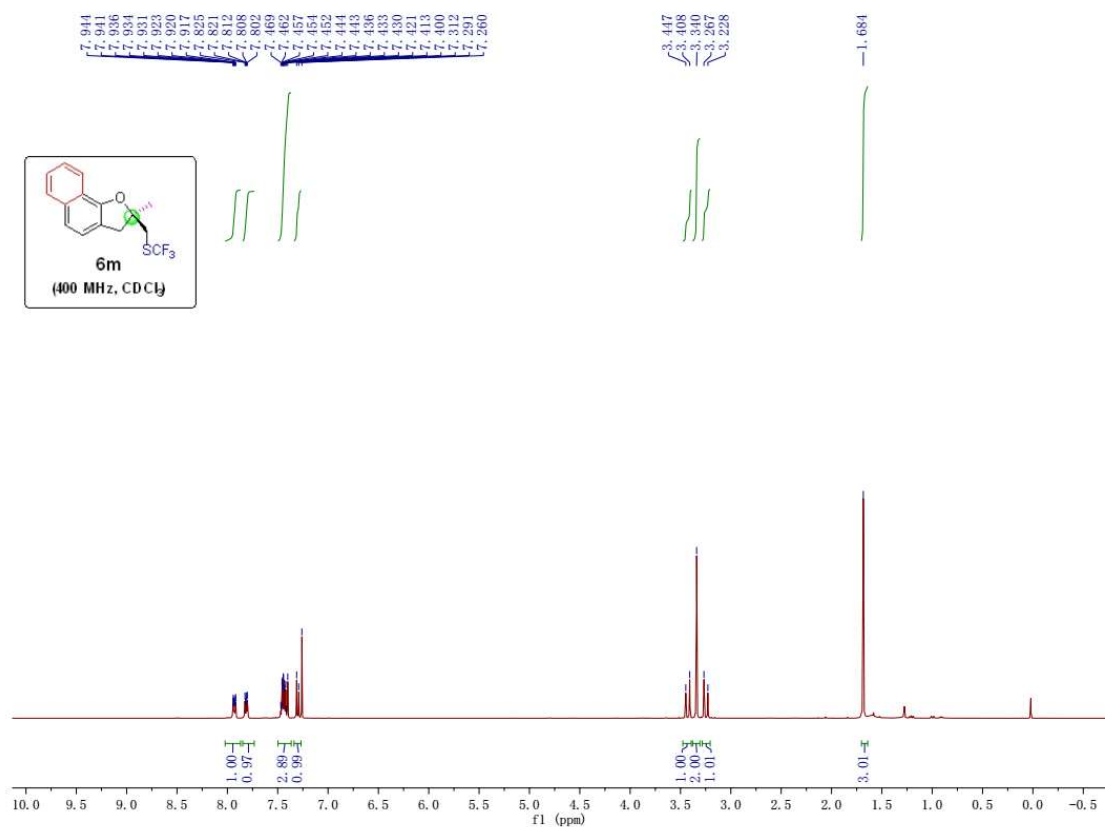



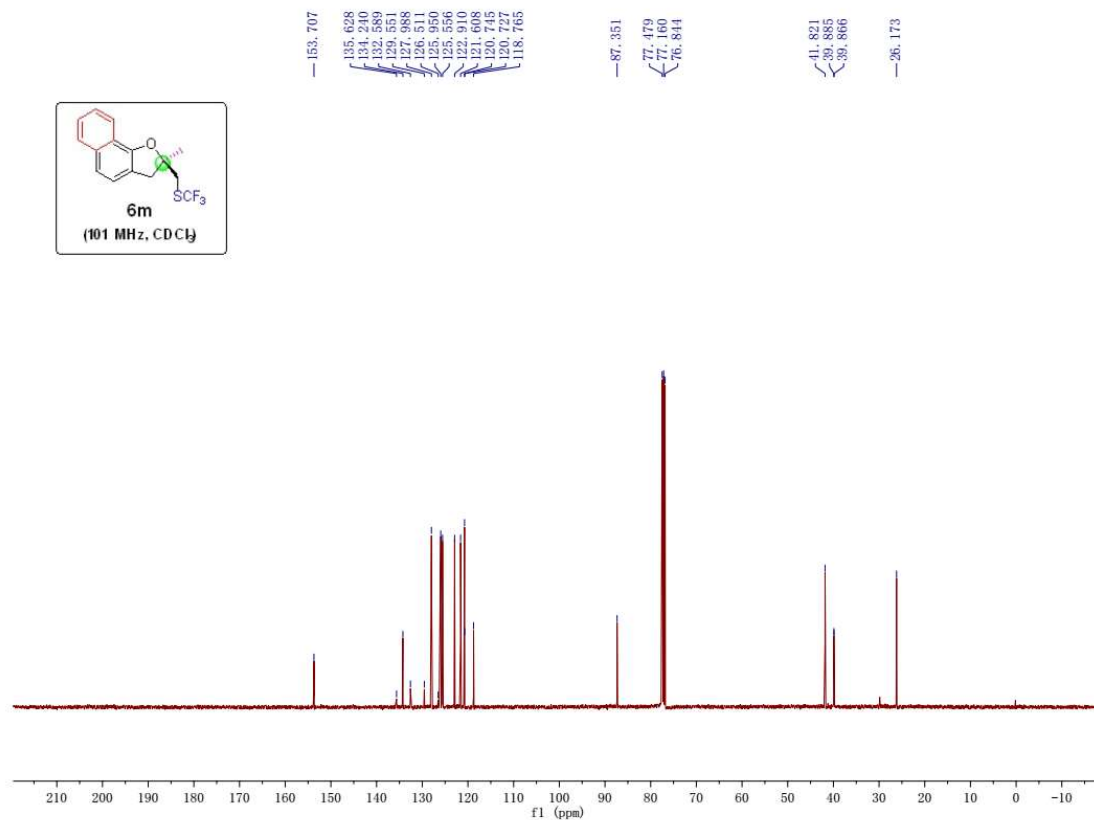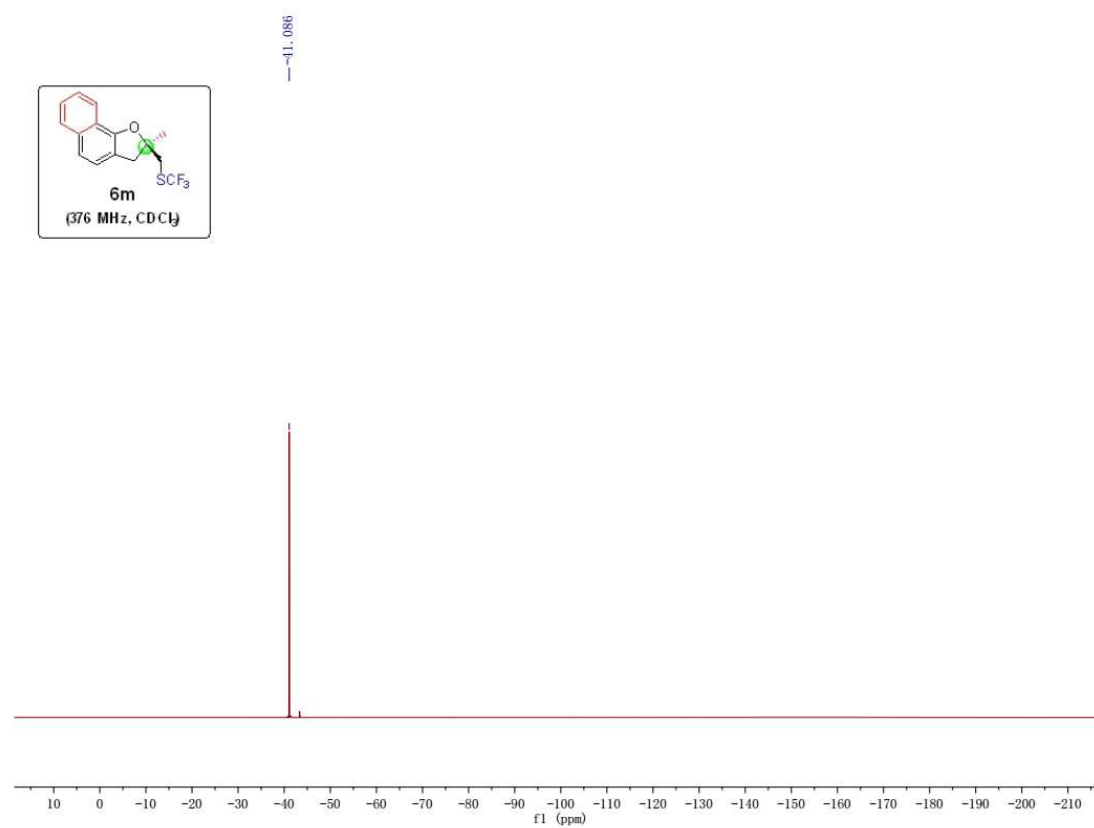

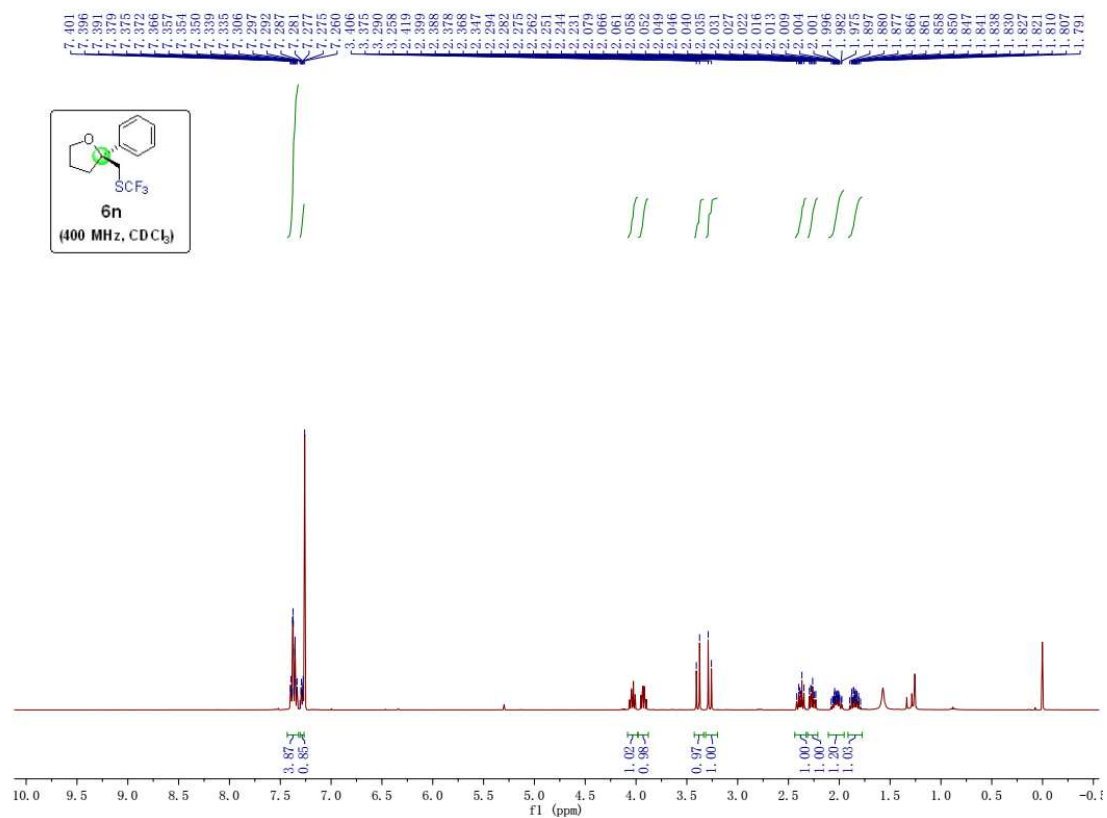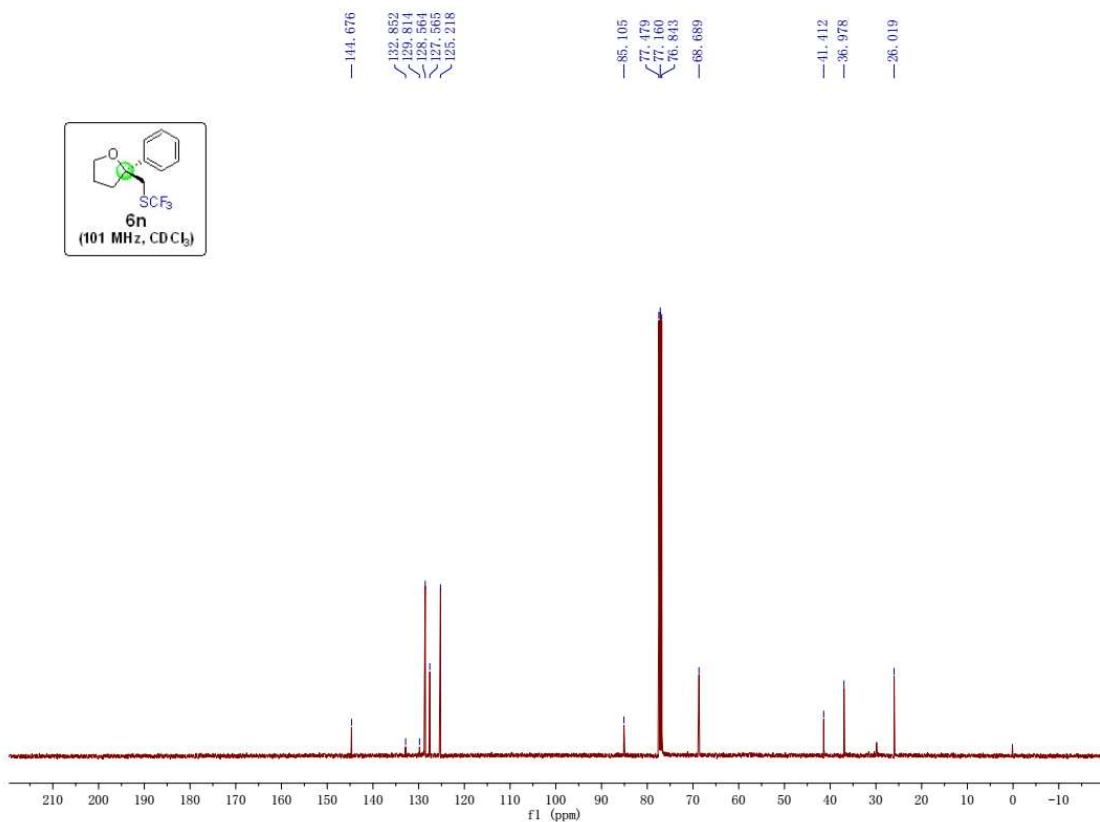

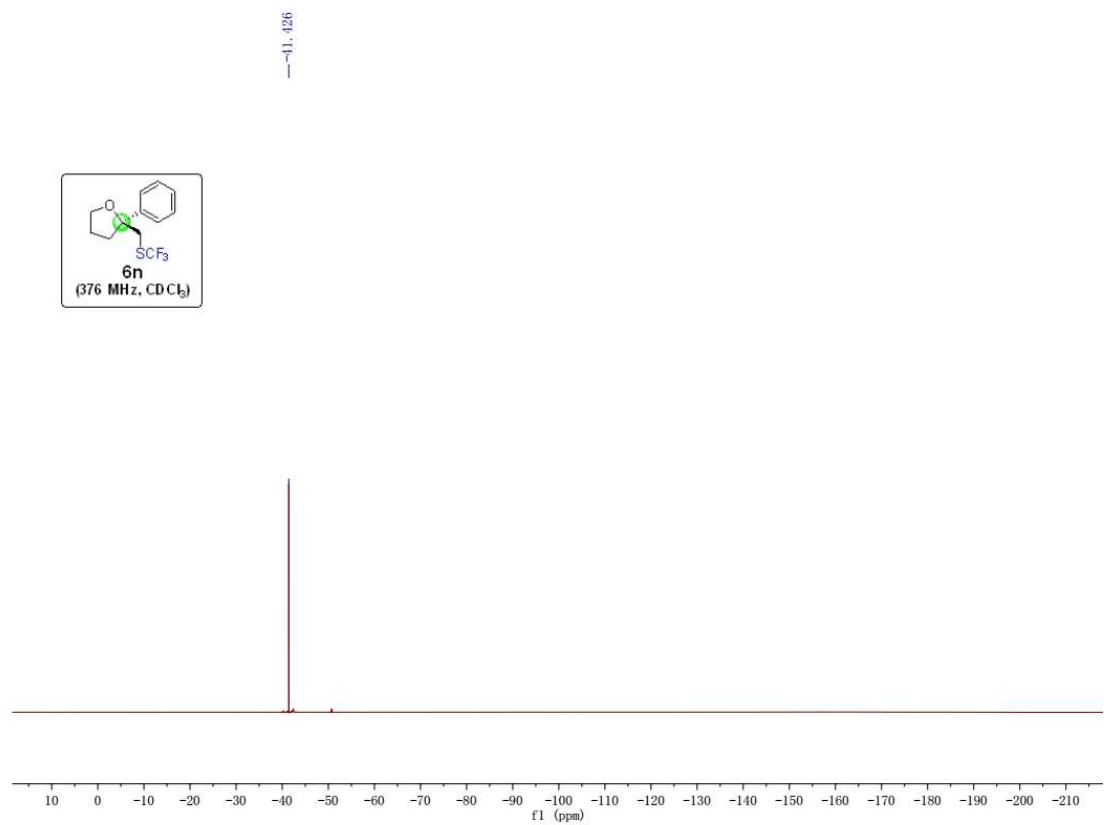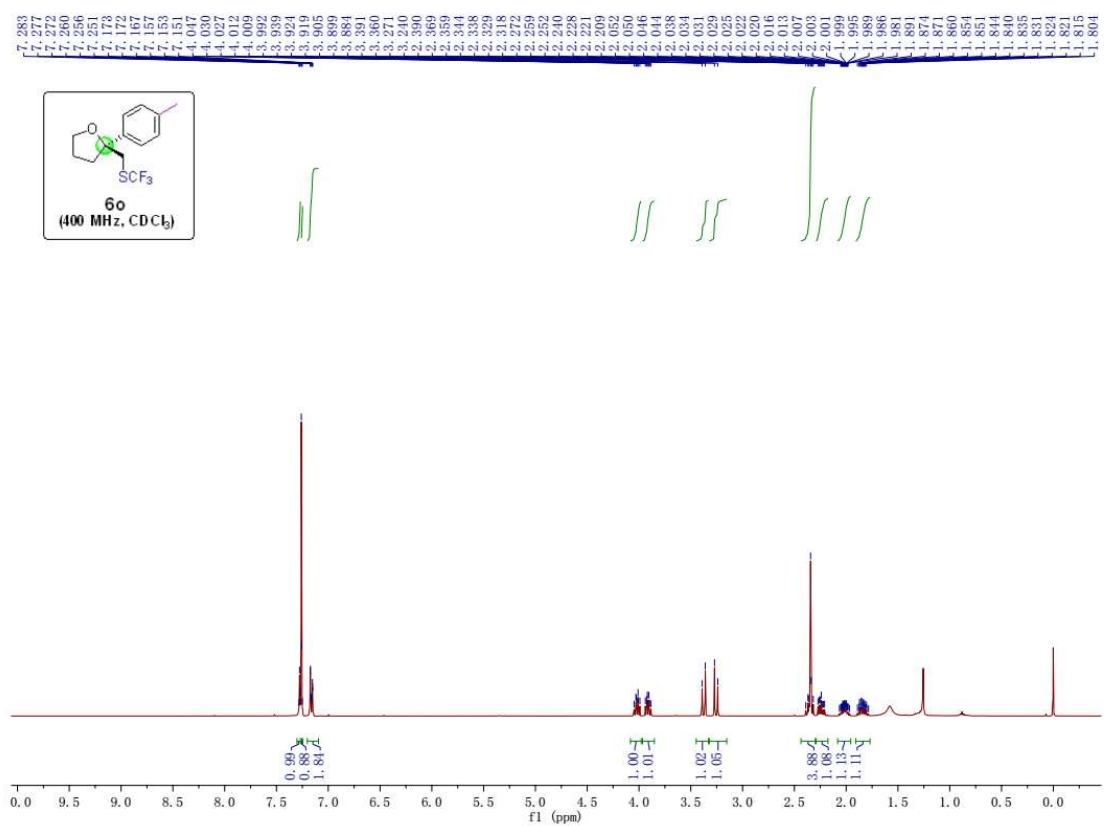

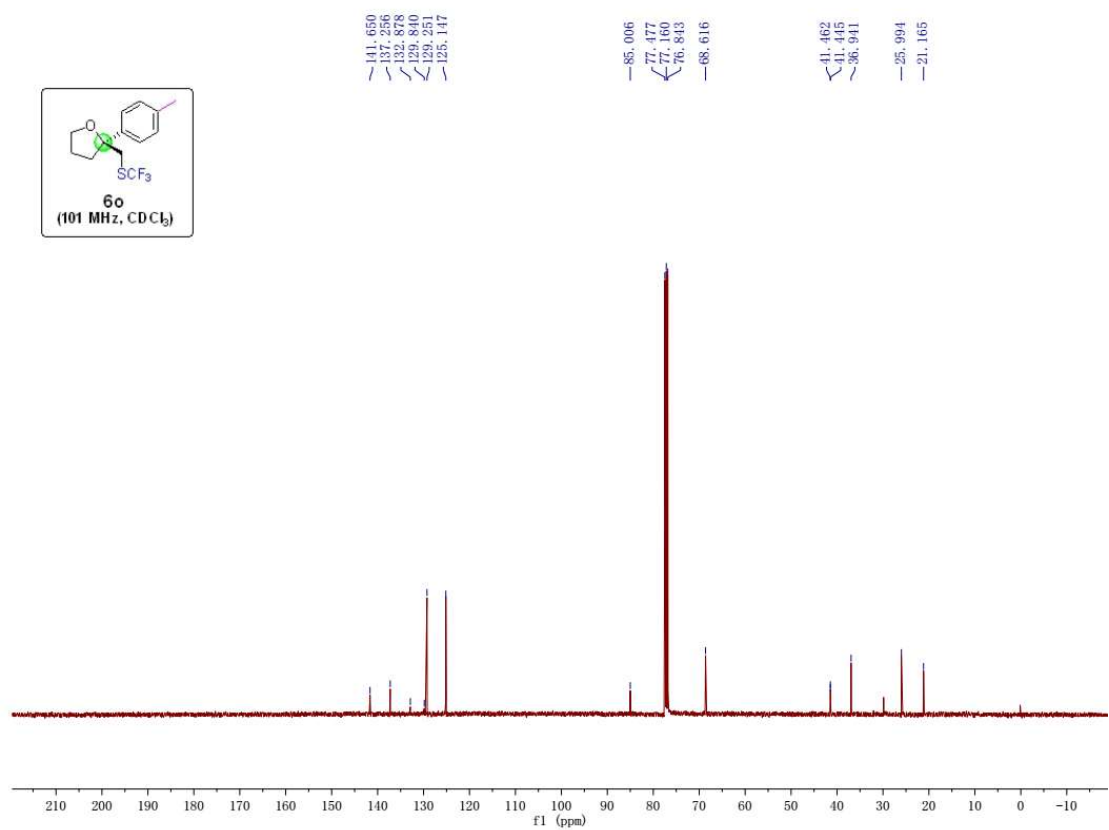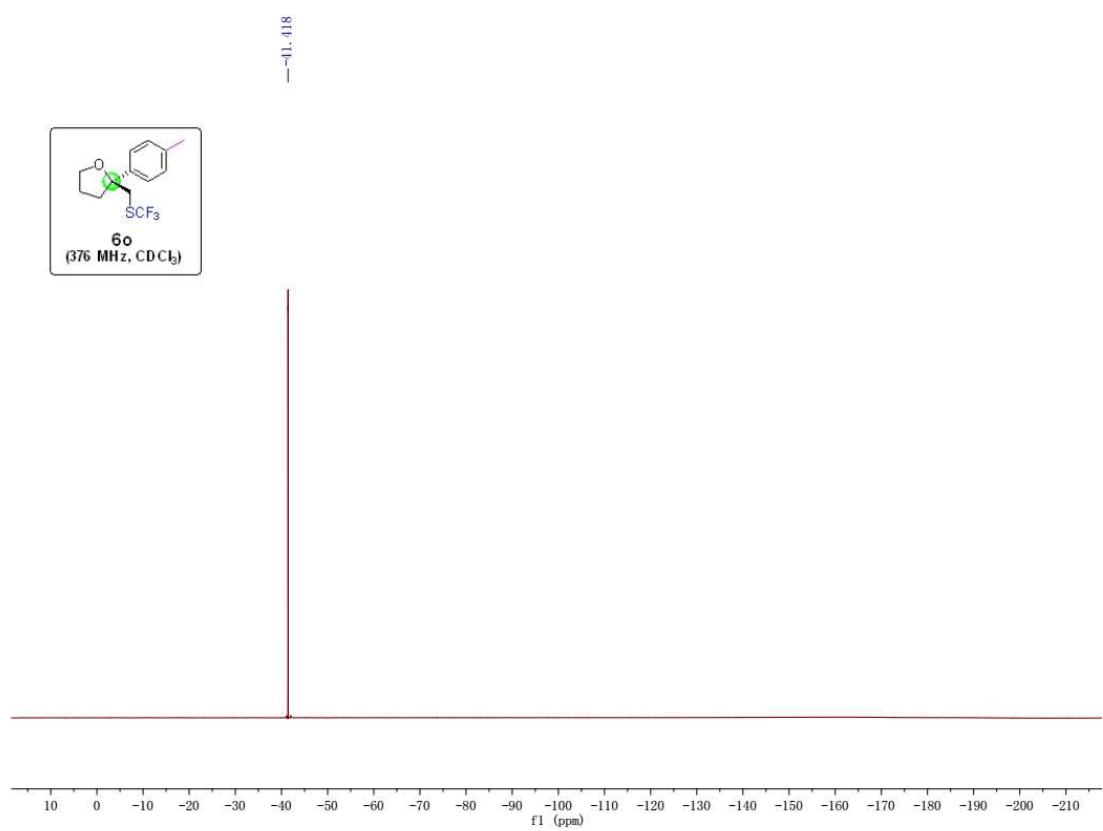

Supplement: Supplementary file 1 [file 24442394]
